# Supplementary material for: Cu(i)-Catalyzed oxidative homo-coupling of thiazoline-4-carboxylates: synthesis of 4,4′-bithiazoline derivatives
Source: Royal Society of Chemistry journal article supplement (doi:10.1039/c6ob01471b), 2016-01-01

## Supporting Information

# Cu(I)-Catalyzed Oxidative Homo-Coupling of Thiazoline-4-Carboxylates: Synthesis of 4,4'-Bithiazoline Derivatives

Xinxin Fang<sup>a</sup>, Kaifan Zhang<sup>a</sup>, Hequan Yao<sup>a\*</sup> and Yue Huang<sup>b\*</sup>

<sup>a</sup> State Key Laboratory of Natural Medicines and Department of Medicinal Chemistry  
China Pharmaceutical University, Nanjing, 24 Tong Jia Xiang, 210009, P. R. China.

<sup>b</sup> Department of Organic Chemistry, China Pharmaceutical University,

Nanjing, 24 Tong Jia Xiang, 210009, P. R. China.

E-mail: hyao@cpu.edu.cn, yhuang@cpu.edu.cn

|                                                                                    |           |
|------------------------------------------------------------------------------------|-----------|
| <b>1. General Information</b> .....                                                | <b>1</b>  |
| <b>2. General Procedure for the Preparation of Substrates</b> .....                | <b>1</b>  |
| <b>2.1 Preparation of Thiazoline-4-carboxylates</b> .....                          | <b>1</b>  |
| <b>2.2 Preparation of Oxazoline-4-carboxylates</b> .....                           | <b>1</b>  |
| <b>3. Cu(I)-catalyzed Homo-coupling of Thiazoline-4-carboxylates</b> .....         | <b>2</b>  |
| <b>3.1 General Procedure</b> .....                                                 | <b>2</b>  |
| <b>3.1.1 Optimization for Synthesis of 4,4'-Bithiazoline-4-carboxylates</b> .....  | <b>2</b>  |
| <b>3.1.2 Typical Experimental Procedure for Synthesis of 2a-2r</b> .....           | <b>3</b>  |
| <b>3.1.3 Gram-scale Reaction of 2a</b> .....                                       | <b>3</b>  |
| <b>3.1.4 Further Functionalization of Generated Homo-coupling Products</b> .....   | <b>4</b>  |
| <b>3.2 Characterization of the Homo-coupling and Functionalized Products</b> ..... | <b>5</b>  |
| <b>References</b> .....                                                            | <b>16</b> |
| <b><sup>13</sup>C and <sup>1</sup>H-NMR Spectra of Title Compounds</b> .....       | <b>17</b> |

## 1. General Information

All chemicals and reagents were purchased from commercial suppliers and used without further purification. The products were purified by flash chromatography on silica gel. Melting point (mp) was measured on a microscopic melting point apparatus.  $^1\text{H}$  NMR spectra were recorded at 300 MHz NMR spectrometer.  $^{13}\text{C}$  NMR spectra were recorded at 75 MHz NMR spectrometer. NMR experiments are reported in  $\delta$  units, parts per million (ppm), and were referenced to  $\text{CDCl}_3$  ( $\delta$  7.26 or 77.0 ppm) as the internal standard. High resolution mass measurement was performed with an electrospray ionization (ESI) method on a Q-TOF mass spectrometer operating in positive ion mode.

## 2. General Procedure for the Preparation of Substrates

### 2.1 Preparation of Thiazoline-4-carboxylates

As shown in **Scheme S1**, the suspension of benzonitrile (20 mmol) and L-cysteine (40 mmol) in EtOH (30 mL) was stirred at room temperature or refluxed for 3 h, then water (20 mL) was added and the reaction mixture was stirred at room temperature overnight. EtOH was removed in vacuum. To the remaining solution was added 1N HCl to adjust to pH = 3 under 0 °C. The resulting precipitate was filtered to yield a white solid 2-phenyl-4, 5-dihydrothiazole-4-carboxylic acid, which was used directly to next step without purification. Crude 2-phenyl-4, 5-dihydrothiazole-4-carboxylic acid (4.1g, 20 mmol) was dissolved in 20 mL DMF at 0 °C, to which potassium bicarbonate (2.0 g, 20 mmol) was added. After stirring for 30 min, iodomethane (1.86 mL, 30 mmol) was added and the solution was brought to room temperature and stirred for 3h until completion by TLC (hexanes: ethyl acetate = 10:1). The reaction mixture was then diluted in ethyl acetate (40 mL), washed with brine 3 times, and dried over  $\text{Na}_2\text{SO}_4$ . The crude product mixture was then concentrated in vacuum and purified by flash chromatography on silica gel to yield the product as a white solid (3.63 g, 82% yield, 2 steps, mp 67 °C). Data are consistent with a previously characterized compound. All other thiazolines were prepared via a route reported by corresponding literatures.<sup>1</sup>

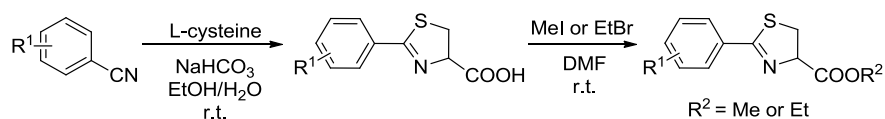

**Scheme S1.** Preparation of thiazoline-4-carboxylates

### 2.2 Preparation of Oxazoline-4-carboxylates

As shown in **Scheme S2**, to a dichloromethane solution (20 mL) of L-serine methyl ester hydrochloride (1.85 g, 10 mmol) and ethyl benzimidate hydrochloride (2.08 g, 13.4 mmol) was added triethylamine (1.9 mL, 13.4 mmol) at 0 °C and the reaction mixture was then stirred at room temperature overnight. After completion of the reaction, the reaction mixture was diluted with dichloromethane (30 mL), washed with saturated  $\text{NaHCO}_3$  solution (40 mL) and brine (40 mL), dried over  $\text{Na}_2\text{SO}_4$ , filtered, and concentrated in vacuum. The residue was purified by flash chromatography on silica gel to afford the product (5.71 g, 89% yield) as a white liquid.<sup>2</sup>

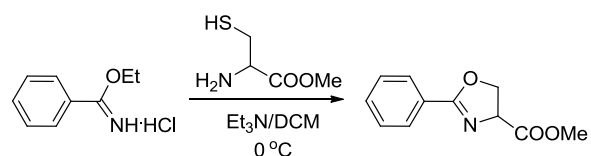

**Scheme S2.** Preparation of oxazoline-4-carboxylate

### 3. Cu(I)-catalyzed Homo-coupling of Azoline-4-carboxylates

#### 3.1 General Procedure

##### 3.1.1 Optimization for Synthesis of 4,4'-Bithiazoline-4-carboxylates<sup>a</sup>

**Table S1** Screening of Reaction Conditions<sup>a</sup>

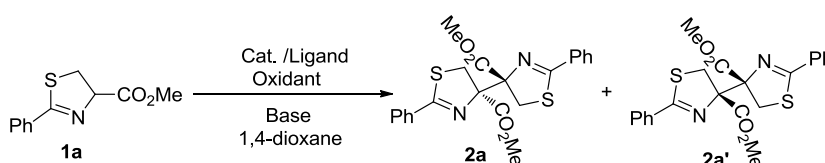

| Entry | Cat.<br>(mol %)        | Base                            | Solvent<br>(1.0 mL) | Ligand    | T<br>(°C) | Yield<br>(%) <sup>b</sup> | dr <sup>b</sup> |
|-------|------------------------|---------------------------------|---------------------|-----------|-----------|---------------------------|-----------------|
| 1     | CuI (10)               | Cs <sub>2</sub> CO <sub>3</sub> | 1,4-dioxane         | <b>L1</b> | 70        | 44                        | 1.4:1           |
| 2     | CuI (10)               | CsF                             | 1,4-dioxane         | <b>L1</b> | 70        | trace                     | /               |
| 3     | CuI (10)               | CsOAc                           | 1,4-dioxane         | <b>L1</b> | 70        | 60                        | 1.2:1           |
| 4     | CuI (10)               | K <sub>2</sub> CO <sub>3</sub>  | 1,4-dioxane         | <b>L1</b> | 70        | trace                     | /               |
| 5     | CuI (10)               | Na <sub>2</sub> CO <sub>3</sub> | 1,4-dioxane         | <b>L1</b> | 70        | trace                     | /               |
| 6     | CuI (10)               | Et <sub>3</sub> N               | 1,4-dioxane         | <b>L1</b> | 70        | trace                     | /               |
| 7     | CuI (10)               | K <sub>3</sub> PO <sub>4</sub>  | 1,4-dioxane         | <b>L1</b> | 70        | 40                        | 1.9:1           |
| 8     | CuI (10)               | DIPEA                           | 1,4-dioxane         | <b>L1</b> | 70        | nr                        | /               |
| 9     | Cu <sub>2</sub> O (10) | CsOAc                           | DCM                 | <b>L1</b> | 70        | 36                        | 1.3:1           |
| 10    | Cu <sub>2</sub> O (10) | CsOAc                           | DCE                 | <b>L1</b> | 70        | 30                        | 1.5:1           |
| 11    | Cu <sub>2</sub> O (10) | CsOAc                           | THF                 | <b>L1</b> | 70        | 39                        | 1.3:1           |
| 12    | Cu <sub>2</sub> O (10) | CsOAc                           | toluene             | <b>L1</b> | 70        | 31                        | 1.2:1           |
| 13    | Cu <sub>2</sub> O (10) | CsOAc                           | DMF                 | <b>L1</b> | 70        | trace                     | /               |
| 14    | Cu <sub>2</sub> O (10) | CsOAc                           | MeOH                | <b>L1</b> | 70        | 33                        | 1.3:1           |
| 15    | Cu <sub>2</sub> O (10) | CsOAc                           | MeCN                | <b>L1</b> | 70        | 52                        | 1.4:1           |
| 16    | Cu <sub>2</sub> O (10) | CsOAc                           | 1,4-dioxane         | <b>L2</b> | 70        | 67                        | 1.2:1           |
| 17    | Cu <sub>2</sub> O (10) | CsOAc                           | 1,4-dioxane         | <b>L3</b> | 70        | 23                        | 1.8:1           |
| 18    | Cu <sub>2</sub> O (10) | CsOAc                           | 1,4-dioxane         | <b>L4</b> | 70        | 68                        | 1.4:1           |
| 19    | Cu <sub>2</sub> O (10) | CsOAc                           | 1,4-dioxane         | <b>L5</b> | 70        | 33                        | 1.4:1           |
| 20    | Cu <sub>2</sub> O (10) | CsOAc                           | 1,4-dioxane         | <b>L6</b> | 70        | 59                        | 1.7:1           |
| 21    | Cu <sub>2</sub> O (5)  | CsOAc                           | 1,4-dioxane         | <b>L1</b> | 70        | 44                        | 1.1:1           |
| 22    | Cu <sub>2</sub> O (15) | CsOAc                           | 1,4-dioxane         | <b>L1</b> | 70        | 82                        | 1.1:1           |
| 23    | Cu <sub>2</sub> O (20) | CsOAc                           | 1,4-dioxane         | <b>L1</b> | 70        | 69                        | 1.2:1           |
| 24    | Cu <sub>2</sub> O (15) | CsOAc                           | 1,4-dioxane         | <b>L1</b> | 65        | 63                        | 1.1:1           |

|                 |                             |              |                    |           |           |                            |              |
|-----------------|-----------------------------|--------------|--------------------|-----------|-----------|----------------------------|--------------|
| <b>25</b>       | <b>Cu<sub>2</sub>O (15)</b> | <b>CsOAc</b> | <b>1,4-dioxane</b> | <b>L1</b> | <b>75</b> | <b>84 (86)<sup>c</sup></b> | <b>1.5:1</b> |
| 26              | Cu <sub>2</sub> O (15)      | CsOAc        | 1,4-dioxane        | L1        | 80        | 65                         | 1.2:1        |
| 27              | Cu <sub>2</sub> O (15)      | NaOH         | 1,4-dioxane        | L1        | 75        | trace                      | /            |
| 28              | Cu <sub>2</sub> O (15)      | KOH          | 1,4-dioxane        | L1        | 75        | trace                      | /            |
| 29 <sup>d</sup> | Cu <sub>2</sub> O (15)      | CsOAc        | 1,4-dioxane        | L1        | 75        | 81                         | 1.3:1        |

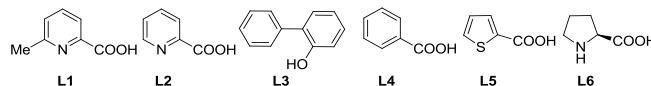

<sup>a</sup> Reaction conditions: **1a** (0.4 mmol, 1 equiv), catalyst, ligand (0.12 mmol), oxidant (0.08 mmol), CsOAc (0.4 mmol), 1,4-dioxane (1.0 mL), air atmosphere, 70 °C, 26 h. <sup>b</sup> Yield and diastereoselectivity ratio were determined by <sup>1</sup>H-NMR using dibromomethane ( $\delta = 4.80$ ) as an internal standard. <sup>c</sup> Isolated yield. <sup>d</sup> Under O<sub>2</sub> atmosphere.

### 3.1.2 Typical Experimental Procedure for Synthesis of 2a-2r

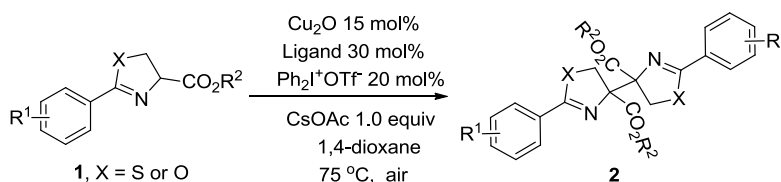

A reaction tube was charged with azole-4-carboxylate **1** (0.4 mmol, 1 equiv), Cu<sub>2</sub>O (0.06 mmol, 15 mol %), Ligand (0.12 mmol, 0.3 equiv), Ph<sub>2</sub>I<sup>+</sup>OTf<sup>-</sup> (0.08 mmol, 0.2 equiv), CsOAc (0.4 mmol, 1 equiv) and 1,4-dioxane (1.0 mL). The reaction mixture was vigorously stirred at 75 °C (oil temperature). After stirring for 26 h, the mixture was cooled to room temperature, diluted with dichloromethane and filtered. The filtrate was washed with saturated NaHCO<sub>3</sub> solution, water and brine, dried over Na<sub>2</sub>SO<sub>4</sub>, and concentrated in vacuum to give dark residue, which was purified by flash chromatography on silica gel (PE:EA = 100:1-40:1; TLC: R<sub>f1</sub> = 0.6-0.4, R<sub>f2</sub> = 0.5-0.2, PE:EA = 20:1) to afford the desired product **2**.

### 3.1.3 Gram-scale Reaction of 2a

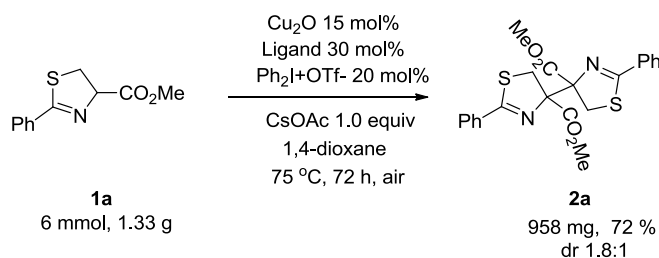

A reaction tube was charged with azole-4-carboxylate **1** (6 mmol, 1.33 g, 1 equiv), Cu<sub>2</sub>O (0.9 mmol, 15 mol %), Ligand (1.8 mmol, 0.3 equiv), Ph<sub>2</sub>I<sup>+</sup>OTf<sup>-</sup> (1.2 mmol, 0.2 equiv), CsOAc (6 mmol, 1 equiv) and 1,4-dioxane (5.0 mL). The reaction mixture was vigorously stirred at 75 °C (oil temperature). After stirring for 72 hours, the mixture was cooled to room temperature, diluted with dichloromethane and filtered. The filtrate was washed with saturated NaHCO<sub>3</sub>, water and brine, dried over Na<sub>2</sub>SO<sub>4</sub>, and concentrated in vacuo to give dark residue, which was purified by flash chromatography on silica gel to afford 958 mg light yellow solid in 72 % yield, dr = 1.8: 1.

### 3.1.4 Further Functionalization of Generated Homo-coupling Products

#### General Procedure for Preparing of 3

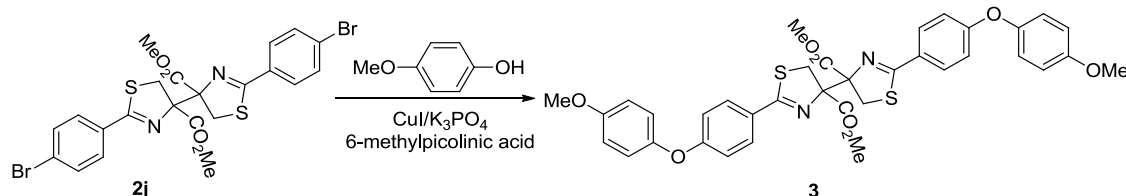

A 25 mL flask was charged with **2j** (0.2 mmol, 1 equiv), CuI (0.04 mmol, 20 mol %), 6-methylpicolinic acid (0.08 mmol, 40 mol %), K<sub>3</sub>PO<sub>4</sub> (0.8 mmol, 4 equiv) and 4-methoxyphenol (0.6 mmol, 3 equiv). The reaction mixture was then vigorously stirred at 90 °C (oil temperature) under argon for 12 h. After cooling to room temperature, the reaction mixture was diluted with ethyl acetate (20 mL) and filtered through a plug of celite. The mixture was concentrated in vacuum and purified by flash chromatography on silica gel to afford the desired product **3** in 56% yield.<sup>3</sup>

#### General Procedure for Preparing of 4

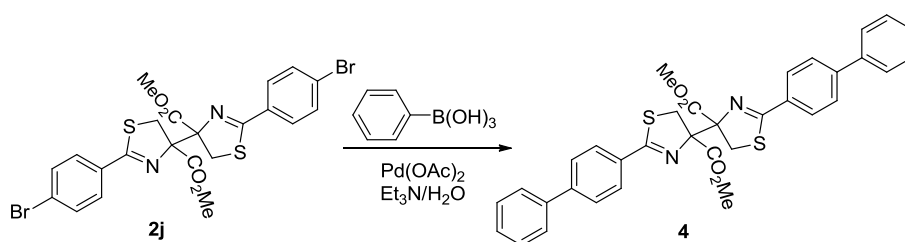

A 25 mL flask was charged with **2j** (0.2 mmol, 1.0 equiv), arylboronic acid (0.3 mmol, 1.5 equiv), Pd(OAc)<sub>2</sub> (2.2 mg, 5 mol %), Et<sub>3</sub>N (0.6 mmol, 3.0 equiv) and H<sub>2</sub>O (3.0 mL). The reaction mixture was stirred at room temperature under air. After the reaction was stopped, the solution was diluted with ethyl acetate, washed with water and brine, dried over Na<sub>2</sub>SO<sub>4</sub>, filtered and concentrated in vacuum. The residue was purified by flash chromatography on silica gel to afford the desired product **4** in 71% yield.<sup>4</sup>

#### General Procedure for Preparing of 4,4'-Bithiazoles

Table S2 Screening of Reaction Conditions<sup>a</sup>

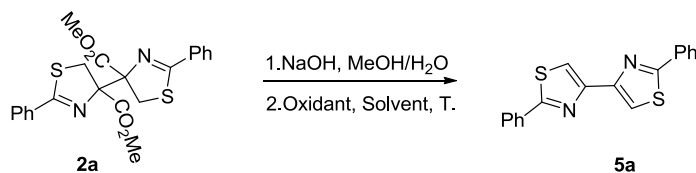

| Entry | Oxidant (equiv)        | Solvent (2.0 mL) | T (°C) | Yield (%) <sup>b</sup> |
|-------|------------------------|------------------|--------|------------------------|
| 1     | MnO <sub>2</sub> (1.1) | DCM              | 80     | trace                  |
| 2     | DDQ (1.1)              | DCM              | 80     | 31                     |
| 3     | TBHP (1.1)             | DCM              | 80     | 0                      |

|           |                  |                |            |                            |
|-----------|------------------|----------------|------------|----------------------------|
| 4         | DTBP (1.1)       | DCM            | 80         | 0                          |
| 5         | IBX (1.1)        | DCM            | 80         | 0                          |
| 6         | DDQ (1.1)        | 1,4-dioxane    | 80         | <10                        |
| 7         | DDQ (1.1)        | toluene        | 80         | 52                         |
| 8         | DDQ (1.1)        | THF            | 80         | <10                        |
| 9         | DDQ (1.1)        | EA             | 80         | 41                         |
| 10        | DDQ (1.1)        | MeCN           | 80         | trace                      |
| 11        | DDQ (2.0)        | toluene        | 80         | 56                         |
| 12        | DDQ (3.0)        | toluene        | 80         | 66                         |
| 13        | DDQ (3.0)        | toluene        | rt         | trace                      |
| 14        | DDQ (3.0)        | toluene        | 100        | 68                         |
| <b>15</b> | <b>DDQ (3.0)</b> | <b>toluene</b> | <b>110</b> | <b>74 (70)<sup>c</sup></b> |

<sup>a</sup> Reaction conditions: (1) **2a** (0.2 mmol), NaOH (1.6 mmol, 8 equiv), MeOH/H<sub>2</sub>O (1:1, 3.0 mL); (2) DDQ (0.6 mmol, 3 equiv), toluene (2.0 ml), 110 °C, 24 h. <sup>b</sup> <sup>1</sup>H NMR yields using dibromomethane ( $\delta = 4.80$ ) as an internal standard.

<sup>c</sup> Isolated yield.

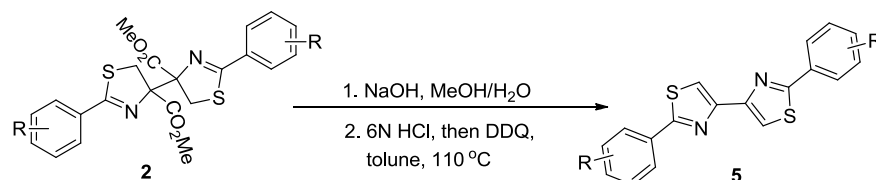

**General Procedure.** A 25 mL round bottom flask was charged with 0.2 mmol **2**, 1.6 mmol NaOH, 5 mL MeOH/H<sub>2</sub>O (1:1), heated to reflux for 2 h.<sup>5</sup> MeOH was removed in vacuum. 6 N HCl was added until pH = 4, the resulting precipitate was filtered to yield a white solid 2,2'-diphenyl-4,4',5,5'-tetrahydro-[4,4'-bithiazole]-4,4'-dicarboxylic acid, which was used directly to next step without purification. A reaction tube was charged with the acid (0.2 mmol, 1 equiv), DDQ (0.6 mmol, 3 equiv) and toluene (2.0 mL). The reaction mixture was vigorously stirred at 110 °C (oil temperature) under air for 24 h. After cooling to room temperature, diluted with dichloromethane and filtered, the filtrate was concentrated in vacuum directly to give dark residue, which was purified by flash chromatography on silica gel to afford the desired product **5**.<sup>6</sup>

### 3.2 Characterization of the Homo-coupling and Functionalized Products

#### Crystal structure of **2a**

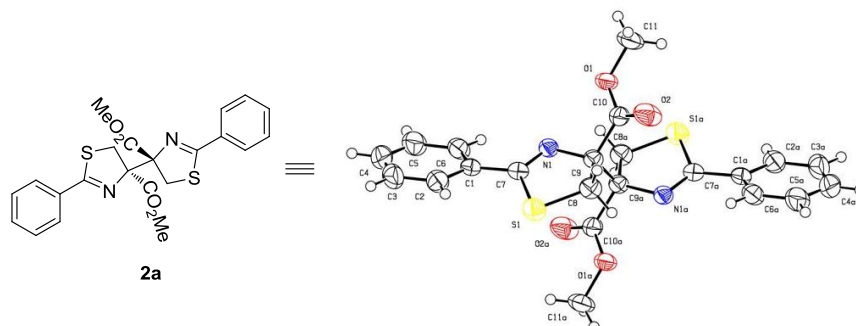

**Figure S1.** ORTEP plot of the crystal structure of **2a** (at 30% probability level).

### *X-ray crystallographic data of 2a*

|                                  |                                                                              |
|----------------------------------|------------------------------------------------------------------------------|
| CCDC number                      | 1441556                                                                      |
| Empirical formula                | C <sub>22</sub> H <sub>20</sub> N <sub>2</sub> O <sub>4</sub> S <sub>2</sub> |
| Formula weight                   | 440.52                                                                       |
| Temperature                      | 296 K                                                                        |
| Wavelength                       | 0.71073 Å                                                                    |
| Space group                      | P2(1)/c                                                                      |
| Unit cell dimensions             | a= 9.621(3) Å =90 °                                                          |
|                                  | b= 14.256(5) Å =111.224(5) °                                                 |
|                                  | c= 8.097(3) Å =90 °                                                          |
| Volume                           | 1035.2(6) Å <sup>3</sup>                                                     |
| Z                                | 2                                                                            |
| Density (calculated)             | 1.413 Mg/m <sup>3</sup>                                                      |
| F(000)                           | 460.0                                                                        |
| Completeness to theta = 25.010 ° | 99.4%                                                                        |
| Absorption correction            | MULTI-SCAN                                                                   |
| Max. and min. transmission       | 0.939 and 0.923                                                              |
| R indices (all data)             | R= 0.0324(1524)<br>wR2(reflections)= 0.0867(1813)                            |

### *Crystal structure of 2a'*

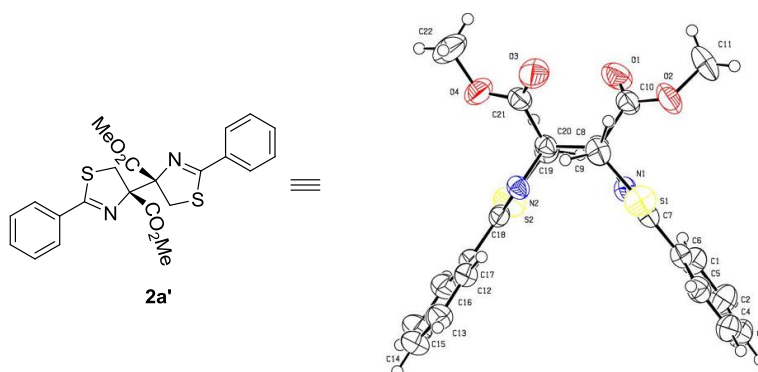

**Figure S2. ORTEP plot of the crystal structure of 2a' (at 30% probability level).**

### *X-ray crystallographic data of 2a'*

|                      |                                                                              |
|----------------------|------------------------------------------------------------------------------|
| CCDC number          | 1444167                                                                      |
| Empirical formula    | C <sub>22</sub> H <sub>20</sub> N <sub>2</sub> O <sub>4</sub> S <sub>2</sub> |
| Formula weight       | 440.52                                                                       |
| Temperature          | 296 K                                                                        |
| Wavelength           | 0.71073 Å                                                                    |
| Space group          | P2(1)/c                                                                      |
| Unit cell dimensions | a= 11.3995(11) Å =90 °                                                       |
|                      | b= 15.4075(15) Å = 97.817(2) °                                               |

|                                  |                                      |       |
|----------------------------------|--------------------------------------|-------|
|                                  | c= 12.3398(12) Å                     | =90 ° |
| Volume                           | 2147.2(4) Å <sup>3</sup>             |       |
| Z                                | 4                                    |       |
| Density (calculated)             | 1.363 Mg/m <sup>3</sup>              |       |
| F(000)                           | 920.0                                |       |
| Completeness to theta = 25.010 ° | 99.9%                                |       |
| Absorption correction            | MULTI-SCAN                           |       |
| Max. and min. transmission       | 0.941 and 0.926                      |       |
| R indices (all data)             | R= 0.0385(3191)<br>wR2= 0.1058(3796) |       |

### Characterization data of 2a-2r

#### (4*R*,4'*S*)-dimethyl 2,2'-diphenyl-4,4',5,5'-tetrahydro-[4,4'-bithiazole]-4,4'-dicarboxylate (2a)

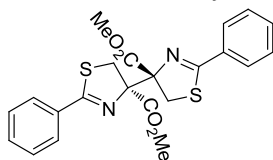

Pale white solid, 45.6 mg, 52% yield, mp 145-146 °C; <sup>1</sup>H NMR (300 MHz, CDCl<sub>3</sub>) δ 7.83-7.67 (m, 4H), 7.44-7.35 (m, 2H), 7.35-7.27 (m, 4H), 4.57 (d, *J* = 11.7 Hz, 2H), 4.21 (d, *J* = 11.7 Hz, 2H), 3.81 (s, 6H); <sup>13</sup>C NMR (75 MHz, CDCl<sub>3</sub>) δ 172.5, 170.9, 132.8, 131.5, 128.6, 128.4, 94.7, 53.1, 38.9 ppm; HRMS (ESI) calcd for [C<sub>22</sub>H<sub>20</sub>N<sub>2</sub>O<sub>4</sub>S<sub>2</sub> + H]<sup>+</sup> 441.0937, found 441.0939.

#### (4*R*,4'*R*)-dimethyl 2,2'-diphenyl-4,4',5,5'-tetrahydro-[4,4'-bithiazole]-4,4'-dicarboxylate (2a')

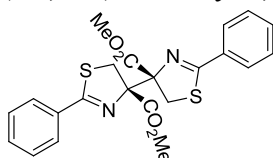

Pale yellow solid, 30.4 mg, 34% yield, mp 165-166 °C; <sup>1</sup>H NMR (300 MHz, CDCl<sub>3</sub>) δ 8.01-7.76 (m, 4H), 7.61-7.45 (m, 2H), 7.40 (dd, *J* = 8.2, 6.4 Hz, 4H), 4.14 (d, *J* = 12.2 Hz, 2H), 3.91 (d, *J* = 12.2 Hz, 2H), 3.77 (s, 6H); <sup>13</sup>C NMR (75 MHz, CDCl<sub>3</sub>) δ 171.8, 171.0, 132.8, 131.7, 128.8, 128.5, 92.8, 53.3, 38.6 ppm; HRMS (ESI) calcd for [C<sub>22</sub>H<sub>20</sub>N<sub>2</sub>O<sub>4</sub>S<sub>2</sub> + H]<sup>+</sup> 441.0937, found 441.0936.

#### (4*R*,4'*S*)-dimethyl 2,2'-di-*p*-tolyl-4,4',5,5'-tetrahydro-[4,4'-bithiazole]-4,4'-dicarboxylate (2b)

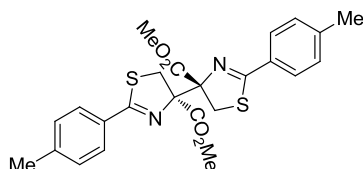

White solid, 32.0 mg, 34% yield, mp 159-160 °C; <sup>1</sup>H NMR (300 MHz, CDCl<sub>3</sub>) δ 7.63 (d, *J* = 8.2 Hz, 4H), 7.11 (d, *J* = 7.9 Hz, 4H), 4.54 (d, *J* = 11.7 Hz, 2H), 4.18 (d, *J* = 11.7 Hz, 2H), 3.80 (s, 6H), 2.32 (s, 6H); <sup>13</sup>C NMR (75 MHz, CDCl<sub>3</sub>) δ 172.2, 171.0, 141.8, 130.2, 129.0, 128.6, 94.6, 53.0, 38.8, 21.5 ppm; HRMS (ESI) calcd for [C<sub>24</sub>H<sub>24</sub>N<sub>2</sub>O<sub>4</sub>S<sub>2</sub> + H]<sup>+</sup> 469.1250, found 469.1250.



**(4*R*,4'*R*)-dimethyl 2,2'-di-*p*-tolyl-4,4',5,5'-tetrahydro-[4,4'-bithiazole]-4,4'-dicarboxylate (2*b*' )**

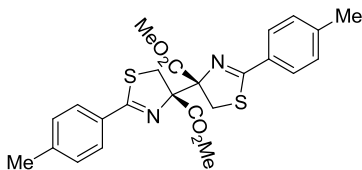

White solid, 29.0 mg, 31% yield, mp 166-167 °C; <sup>1</sup>H NMR (300 MHz, CDCl<sub>3</sub>) δ 7.76 (d, *J* = 8.2 Hz, 4H), 7.20 (d, *J* = 7.9 Hz, 4H), 4.12 (d, *J* = 12.2 Hz, 2H), 3.89 (d, *J* = 12.2 Hz, 2H), 3.76 (s, 6H), 2.39 (s, 6H); <sup>13</sup>C NMR (75 MHz, CDCl<sub>3</sub>) δ 171.9, 170.8, 142.2, 130.2, 129.1, 128.8, 92.8, 53.3, 38.5, 21.6 ppm; HRMS (ESI) calcd for [C<sub>24</sub>H<sub>24</sub>N<sub>2</sub>O<sub>4</sub>S<sub>2</sub> + H]<sup>+</sup> 469.1250, found 469.1257.

**(4*R*,4'*S*)-dimethyl 2,2'-di-*m*-tolyl-4,4',5,5'-tetrahydro-[4,4'-bithiazole]-4,4'-dicarboxylate (2*c*)**

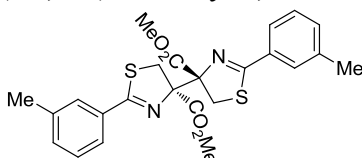

White oil liquid, 36.5 mg, 39% yield; <sup>1</sup>H NMR (300 MHz, CDCl<sub>3</sub>) δ 7.56 (d, *J* = 2.8 Hz, 4H), 7.24-7.12 (m, 4H), 4.55 (d, *J* = 11.7 Hz, 2H), 4.20 (d, *J* = 11.7 Hz, 2H), 3.80 (s, 6H), 2.31 (s, 6H); <sup>13</sup>C NMR (75 MHz, CDCl<sub>3</sub>) δ 172.6, 171.0, 138.1, 132.8, 132.2, 129.1, 128.2, 125.8, 94.6, 53.1, 38.8, 21.3 ppm; HRMS (ESI) calcd for [C<sub>24</sub>H<sub>24</sub>N<sub>2</sub>O<sub>4</sub>S<sub>2</sub> + H]<sup>+</sup> 469.1250, found 469.1251.

**(4*R*,4'*R*)-dimethyl 2,2'-di-*m*-tolyl-4,4',5,5'-tetrahydro-[4,4'-bithiazole]-4,4'-dicarboxylate (2*c*' )**

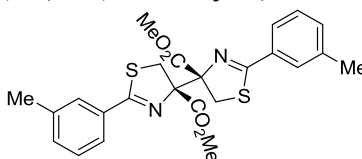

Yellow solid, 33.1 mg, 35% yield, mp 135-136 °C; <sup>1</sup>H NMR (300 MHz, CDCl<sub>3</sub>) δ 7.70 (s, 2H), 7.68-7.59 (m, 2H), 7.37-7.26 (m, 4H), 4.14 (d, *J* = 12.2 Hz, 2H), 3.90 (d, *J* = 12.2 Hz, 2H), 3.77 (s, 6H), 2.38 (s, 6H); <sup>13</sup>C NMR (75 MHz, CDCl<sub>3</sub>) δ 171.9, 171.2, 138.2, 132.8, 132.5, 129.2, 128.3, 126.1, 92.8, 53.3, 38.5, 21.3 ppm; HRMS (ESI) calcd for [C<sub>24</sub>H<sub>24</sub>N<sub>2</sub>O<sub>4</sub>S<sub>2</sub> + H]<sup>+</sup> 469.1250, found 469.1250.

**(4*R*,4'*S*)-dimethyl 2,2'-di-*o*-tolyl-4,4',5,5'-tetrahydro-[4,4'-bithiazole]-4,4'-dicarboxylate (2*d*)**

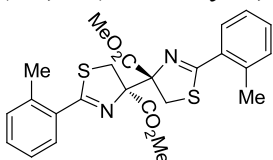

White solid, 29.3 mg, 31% yield, mp 103-104 °C; <sup>1</sup>H NMR (300 MHz, CDCl<sub>3</sub>) δ 7.51 (dd, *J* = 8.0, 1.5 Hz, 2H), 7.37-7.24 (m, 2H), 7.19 (d, *J* = 7.2 Hz, 4H), 4.48 (d, *J* = 11.6 Hz, 2H), 4.18 (d, *J* = 11.7 Hz, 2H), 3.82 (s, 6H), 2.45 (s, 6H); <sup>13</sup>C NMR (75 MHz, CDCl<sub>3</sub>) δ 173.0, 170.7, 137.5, 132.3, 131.3, 130.3, 129.9, 125.7, 95.5, 53.1, 39.1, 21.4 ppm; HRMS (ESI) calcd for [C<sub>24</sub>H<sub>24</sub>N<sub>2</sub>O<sub>4</sub>S<sub>2</sub> + H]<sup>+</sup> 469.1250, found 469.1248.

**(4*R*,4'*R*)-dimethyl 2,2'-di-*o*-tolyl-4,4',5,5'-tetrahydro-[4,4'-bithiazole]-4,4'-dicarboxylate (2*d*'**

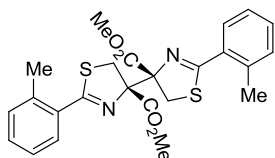

White solid, 24.4 mg, 26% yield, mp 142-143 °C; <sup>1</sup>H NMR (300 MHz, CDCl<sub>3</sub>) δ 7.57 (dd, *J* = 7.6, 1.5 Hz, 2H), 7.31-7.28 (m, 2H), 7.27-7.15 (m, 4H), 4.06 (d, *J* = 12.1 Hz, 2H), 3.90 (d, *J* = 12.1 Hz, 2H), 3.80 (s, 6H), 2.58 (s, 6H); <sup>13</sup>C NMR (75 MHz, CDCl<sub>3</sub>) δ 171.8, 171.4, 138.0, 132.3, 131.3, 130.4, 130.0, 125.6, 93.7, 53.2, 38.7, 21.2 ppm; HRMS (ESI) calcd for [C<sub>24</sub>H<sub>24</sub>N<sub>2</sub>O<sub>4</sub>S<sub>2</sub> + H]<sup>+</sup> 469.1250, found 469.1251.

**(4*R*,4'*S*)-dimethyl 2,2'-bis(4-methoxyphenyl)-4,4',5,5'-tetrahydro-[4,4'-bithiazole]-4,4'-dicarboxylate (2*e*)**

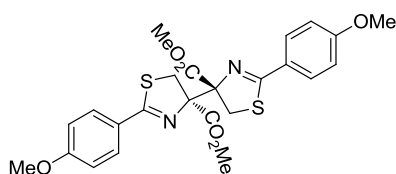

White oil liquid, 27.4 mg, 27% yield; <sup>1</sup>H NMR (300 MHz, CDCl<sub>3</sub>) δ 7.70 (d, *J* = 8.8 Hz, 4H), 6.80 (d, *J* = 8.7 Hz, 4H), 4.53 (d, *J* = 11.7 Hz, 2H), 4.17 (d, *J* = 11.6 Hz, 2H), 3.79 (s, 6H), 3.77 (s, 6H); <sup>13</sup>C NMR (75 MHz, CDCl<sub>3</sub>) δ 170.9, 170.7, 161.6, 129.8, 125.1, 113.1, 94.0, 54.8, 52.5, 38.3 ppm; HRMS (ESI) calcd for [C<sub>24</sub>H<sub>24</sub>N<sub>2</sub>O<sub>6</sub>S<sub>2</sub> + H]<sup>+</sup> 501.1149, found 501.1151.

**(4*R*,4'*R*)-dimethyl 2,2'-bis(4-methoxyphenyl)-4,4',5,5'-tetrahydro-[4,4'-bithiazole]-4,4'-dicarboxylate (2*e*'**

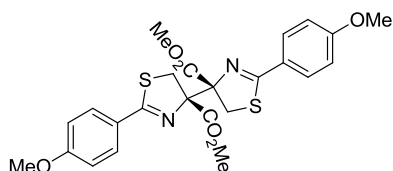

White solid, 22.8 mg, 23% yield, mp 175-176 °C; <sup>1</sup>H NMR (300 MHz, CDCl<sub>3</sub>) δ 7.82 (d, *J* = 8.5 Hz, 4H), 6.89 (d, *J* = 8.5 Hz, 4H), 4.11 (d, *J* = 12.2 Hz, 2H), 3.89-3.84 (m, 8H), 3.75 (s, 6H); <sup>13</sup>C NMR (75 MHz, CDCl<sub>3</sub>) δ 172.0, 170.0, 162.4, 130.5, 125.7, 113.7, 92.7, 55.4, 53.2, 38.6 ppm; HRMS (ESI) calcd for [C<sub>24</sub>H<sub>24</sub>N<sub>2</sub>O<sub>6</sub>S<sub>2</sub> + H]<sup>+</sup> 501.1149, found 501.1151.

**(4*R*,4'*S*)-dimethyl 2,2'-bis(4-(methoxycarbonyl)phenyl)-4,4',5,5'-tetrahydro-[4,4'-bithiazole]-4,4'-dicarboxylate (2*f*)**

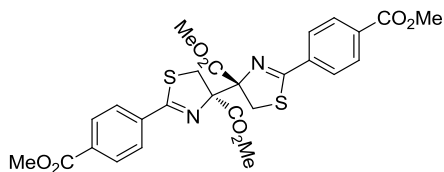

White solid, 38.0 mg, 34% yield, mp 154-155 °C; <sup>1</sup>H NMR (300 MHz, CDCl<sub>3</sub>) δ 7.89 (d, *J* = 8.2 Hz, 4H), 7.72 (d, *J* = 8.3 Hz, 4H), 4.51 (d, *J* = 11.8 Hz, 2H), 4.17 (d, *J* = 11.8 Hz, 2H), 3.81 (s, 6H), 3.75 (s, 6H); <sup>13</sup>C NMR (75 MHz, CDCl<sub>3</sub>) δ 171.9, 170.5, 166.3, 136.4, 132.6, 129.6, 128.5, 94.7,

53.3, 52.3, 39.0 ppm; HRMS (ESI) calcd for  $[C_{26}H_{24}N_2O_8S_2 + H]^+$  557.1047, found 557.1048.

**(4*R*,4'*S*)-dimethyl 2,2'-bis(4-acetylphenyl)-4,4',5,5'-tetrahydro-[4,4'-bithiazole]-4,4'-dicarboxylate (2*g*)**

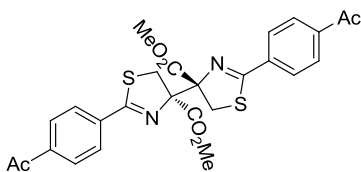

Yellow oil liquid, 32.5 mg, 31% yield;  $^1H$  NMR (300 MHz,  $CDCl_3$ )  $\delta$  7.76-7.72 (m, 8H), 4.52 (d,  $J = 11.8$  Hz, 2H), 4.18 (d,  $J = 11.8$  Hz, 2H), 3.75 (s, 6H), 2.48 (s, 6H);  $^{13}C$  NMR (75 MHz,  $CDCl_3$ )  $\delta$  197.4, 171.8, 170.4, 139.0, 136.4, 128.8, 128.3, 94.7, 53.3, 39.0, 26.7 ppm; HRMS (ESI) calcd for  $[C_{26}H_{24}N_2O_6S_2 + H]^+$  525.1149, found 525.1157.

**(4*R*,4'*R*)-dimethyl 2,2'-bis(4-acetylphenyl)-4,4',5,5'-tetrahydro-[4,4'-bithiazole]-4,4'-dicarboxylate (2*g'*)**

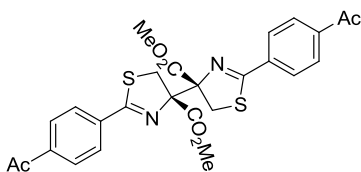

Pale yellow solid, 29.5 mg, 28% yield, mp 65-66 °C;  $^1H$  NMR (300 MHz,  $CDCl_3$ )  $\delta$  8.45-7.53 (m, 8H), 4.08 (d,  $J = 12.4$  Hz, 2H), 3.87 (d,  $J = 12.3$  Hz, 2H), 3.71 (s, 6H), 2.56 (s, 6H);  $^{13}C$  NMR (75 MHz,  $CDCl_3$ )  $\delta$  197.5, 171.4, 170.4, 139.3, 136.5, 129.0, 128.4, 92.8, 53.4, 38.8, 26.9 ppm; HRMS (ESI) calcd for  $[C_{26}H_{24}N_2O_6S_2 + H]^+$  525.1149, found 525.1145.

**(4*R*,4'*S*)-dimethyl 2,2'-bis(4-fluorophenyl)-4,4',5,5'-tetrahydro-[4,4'-bithiazole]-4,4'-dicarboxylate (2*h*)**

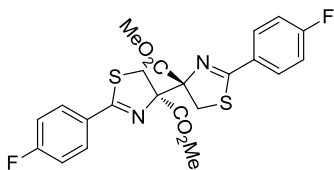

White solid, 40.7 mg, 43% yield, mp 110-111 °C;  $^1H$  NMR (300 MHz,  $CDCl_3$ )  $\delta$  7.88-7.59 (m, 4H), 6.99-6.96 (m, 4H), 4.56 (d,  $J = 11.8$  Hz, 2H), 4.21 (d,  $J = 11.7$  Hz, 2H), 3.81 (s, 6H);  $^{13}C$  NMR (75 MHz,  $CDCl_3$ )  $\delta$  171.2, 170.7, 166.4, 163.0, 130.8, 130.7, 129.0, 115.6, 115.3, 94.6, 53.2, 39.1 ppm; HRMS (ESI) calcd for  $[C_{22}H_{18}F_2N_2O_4S_2 + H]^+$  477.0749, found 477.0749.

**(4*R*,4'*S*)-dimethyl 2,2'-bis(4-chlorophenyl)-4,4',5,5'-tetrahydro-[4,4'-bithiazole]-4,4'-dicarboxylate (2*i*)**

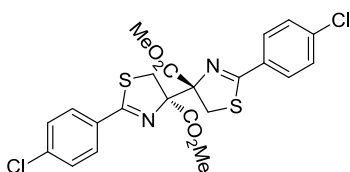

White solid, 45.8 mg, 45% yield, mp 160-161 °C;  $^1\text{H}$  NMR (300 MHz,  $\text{CDCl}_3$ )  $\delta$  7.67 (d,  $J = 8.6$  Hz, 4H), 7.28 (d,  $J = 8.5$  Hz, 4H), 4.55 (d,  $J = 11.7$  Hz, 2H), 4.21 (d,  $J = 11.8$  Hz, 2H), 3.81 (s, 6H);  $^{13}\text{C}$  NMR (75 MHz,  $\text{CDCl}_3$ )  $\delta$  171.4, 170.6, 137.7, 131.1, 129.8, 128.6, 94.6, 53.2, 39.0 ppm; HRMS (ESI) calcd for  $[\text{C}_{22}\text{H}_{18}\text{Cl}_2\text{N}_2\text{O}_4\text{S}_2 + \text{H}]^+$  509.0158, found 509.0159.

**(4*R*,4'*R*)-dimethyl 2,2'-bis(4-chlorophenyl)-4,4',5,5'-tetrahydro-[4,4'-bithiazole]-4,4'-dicarboxylate (2i')**

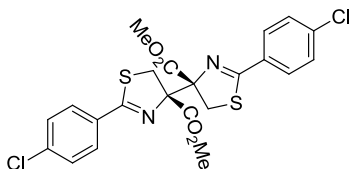

Pale yellow solid, 32.7 mg, 32% yield, mp 164-165 °C;  $^1\text{H}$  NMR (300 MHz,  $\text{CDCl}_3$ )  $\delta$  7.80 (d,  $J = 8.6$  Hz, 4H), 7.38 (d,  $J = 8.5$  Hz, 4H), 4.12 (d,  $J = 12.3$  Hz, 2H), 3.90 (d,  $J = 12.3$  Hz, 2H), 3.77 (s, 6H);  $^{13}\text{C}$  NMR (75 MHz,  $\text{CDCl}_3$ )  $\delta$  171.6, 170.0, 138.0, 131.2, 130.0, 128.7, 92.7, 53.4, 38.8 ppm; HRMS (ESI) calcd for  $[\text{C}_{22}\text{H}_{18}\text{Cl}_2\text{N}_2\text{O}_4\text{S}_2 + \text{H}]^+$  509.0158, found 509.0162.

**(4*R*,4'*S*)-dimethyl 2,2'-bis(4-bromophenyl)-4,4',5,5'-tetrahydro-[4,4'-bithiazole]-4,4'-dicarboxylate (2j)**

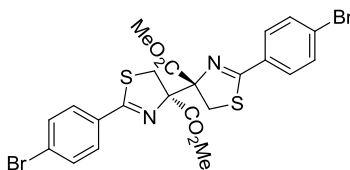

White solid, 52.5 mg, 44% yield, mp 170-171 °C;  $^1\text{H}$  NMR (300 MHz,  $\text{CDCl}_3$ )  $\delta$  7.67 (d,  $J = 8.6$  Hz, 4H), 7.28 (d,  $J = 8.5$  Hz, 4H), 4.55 (d,  $J = 11.7$  Hz, 2H), 4.21 (d,  $J = 11.8$  Hz, 2H), 3.81 (s, 6H);  $^{13}\text{C}$  NMR (75 MHz,  $\text{CDCl}_3$ )  $\delta$  171.5, 170.6, 131.6, 131.5, 130.0, 126.2, 94.6, 53.2, 39.0 ppm; HRMS (ESI) calcd for  $[\text{C}_{22}\text{H}_{18}\text{Br}_2\text{N}_2\text{O}_4\text{S}_2 + \text{H}]^+$  596.9148, found 596.9149.

**(4*R*,4'*R*)-dimethyl 2,2'-bis(4-bromophenyl)-4,4',5,5'-tetrahydro-[4,4'-bithiazole]-4,4'-dicarboxylate (2j')**

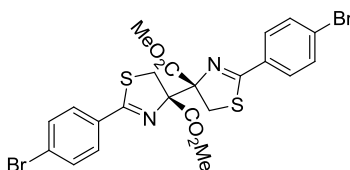

White solid, 47.8 mg, 40% yield, mp 172-173 °C;  $^1\text{H}$  NMR (300 MHz,  $\text{CDCl}_3$ )  $\delta$  7.73 (d,  $J = 8.5$  Hz, 4H), 7.54 (d,  $J = 8.5$  Hz, 4H), 4.11 (d,  $J = 12.3$  Hz, 2H), 3.90 (d,  $J = 12.3$  Hz, 2H), 3.77 (s, 6H);  $^{13}\text{C}$  NMR (75 MHz,  $\text{CDCl}_3$ )  $\delta$  171.5, 170.1, 131.7, 131.6, 130.2, 126.5, 92.7, 53.4, 38.8 ppm; HRMS (ESI) calcd for  $[\text{C}_{22}\text{H}_{18}\text{Br}_2\text{N}_2\text{O}_4\text{S}_2 + \text{H}]^+$  596.9148, found 596.9146.

**(4*R*,4'*S*)-dimethyl 2,2'-bis(4-iodophenyl)-4,4',5,5'-tetrahydro-[4,4'-bithiazole]-4,4'-dicarboxylate (2*k*)**

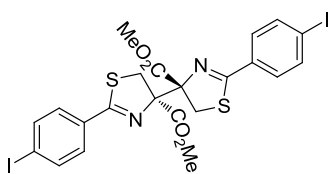

White solid, 59.7 mg, 43% yield, mp 160-161 °C; <sup>1</sup>H NMR (300 MHz, CDCl<sub>3</sub>) δ 7.71-7.59 (m, 4H), 7.52-7.39 (m, 4H), 4.54 (d, *J* = 11.8 Hz, 2H), 4.20 (d, *J* = 11.8 Hz, 2H), 3.80 (s, 6H); <sup>13</sup>C NMR (75 MHz, CDCl<sub>3</sub>) δ 171.7, 170.6, 137.6, 132.1, 130.0, 98.6, 94.6, 53.2, 39.0 ppm; HRMS (ESI) calcd for [C<sub>22</sub>H<sub>18</sub>I<sub>2</sub>N<sub>2</sub>O<sub>4</sub>S<sub>2</sub> + H]<sup>+</sup> 692.8870, found 692.8868.

**(4*R*,4'*S*)-dimethyl 2,2'-bis(3-bromo-4-methylphenyl)-4,4',5,5'-tetrahydro-[4,4'-bithiazole]-4,4'-dicarboxylate (2*l*)**

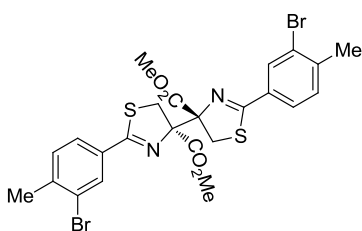

White solid, 55.6 mg, 45% yield, mp 170-171 °C; <sup>1</sup>H NMR (300 MHz, CDCl<sub>3</sub>) δ 7.92 (d, *J* = 1.8 Hz, 2H), 7.55 (dd, *J* = 7.9, 1.8 Hz, 2H), 7.14 (d, *J* = 7.9 Hz, 2H), 4.55 (d, *J* = 11.7 Hz, 2H), 4.20 (d, *J* = 11.8 Hz, 2H), 3.81 (s, 6H), 2.34 (s, 6H); <sup>13</sup>C NMR (75 MHz, CDCl<sub>3</sub>) δ 170.5, 170.2, 141.1, 131.6, 131.5, 130.1, 127.0, 124.3, 94.0, 52.7, 38.5, 22.5 ppm; HRMS (ESI) calcd for [C<sub>24</sub>H<sub>22</sub>Br<sub>2</sub>N<sub>2</sub>O<sub>4</sub>S<sub>2</sub> + H]<sup>+</sup> 624.9461, found 624.9462.

**(4*R*,4'*R*)-dimethyl 2,2'-bis(3-bromo-4-methylphenyl)-4,4',5,5'-tetrahydro-[4,4'-bithiazole]-4,4'-dicarboxylate (2*l*')**

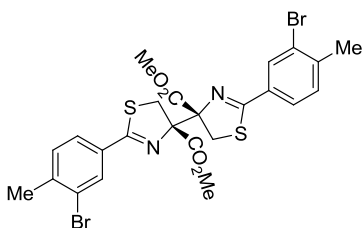

White solid, 55.4 mg, 44% yield, mp 172-173 °C; <sup>1</sup>H NMR (300 MHz, CDCl<sub>3</sub>) δ 8.05 (d, *J* = 1.8 Hz, 2H), 7.67 (dd, *J* = 7.9, 1.8 Hz, 2H), 7.25 (d, *J* = 7.7 Hz, 2H), 4.12 (d, *J* = 12.3 Hz, 2H), 3.90 (d, *J* = 12.3 Hz, 2H), 3.77 (s, 6H), 2.43 (s, 6H); <sup>13</sup>C NMR (75 MHz, CDCl<sub>3</sub>) δ 171.1, 169.1, 141.4, 131.7, 131.6, 130.2, 127.1, 124.5, 92.1, 52.9, 38.2, 22.6 ppm; HRMS (ESI) calcd for [C<sub>24</sub>H<sub>22</sub>Br<sub>2</sub>N<sub>2</sub>O<sub>4</sub>S<sub>2</sub> + H]<sup>+</sup> 624.9461, found 624.9463.

**(4*R*,4'*S*)-dimethyl 2,2'-bis(4-fluoro-3-methylphenyl)-4,4',5,5'-tetrahydro-[4,4'-bithiazole]-4,4'-dicarboxylate (2*m*)**

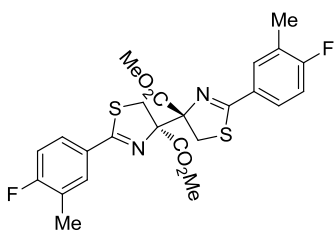

White solid, 33.9 mg, 34% yield, mp 160-161 °C; <sup>1</sup>H NMR (300 MHz, CDCl<sub>3</sub>) δ 7.76-7.36 (m, 4H), 6.92 (t, *J* = 8.9 Hz, 2H), 4.55 (d, *J* = 11.7 Hz, 2H), 4.20 (d, *J* = 11.8 Hz, 2H), 3.81 (s, 6H), 2.22 (s, 6H); <sup>13</sup>C NMR (75 MHz, CDCl<sub>3</sub>) δ 170.9, 170.3, 164.5, 161.1, 131.5, 131.4, 128.2, 127.6, 127.5, 124.7, 124.4, 114.7, 114.4, 94.1, 52.6, 38.5, 14.0, 13.9 ppm; HRMS (ESI) calcd for [C<sub>24</sub>H<sub>22</sub>F<sub>2</sub>N<sub>2</sub>O<sub>4</sub>S<sub>2</sub> + H]<sup>+</sup> 505.1062, found 505.1059.

**(4*R*,4'*R*)-dimethyl 2,2'-bis(4-fluoro-3-methylphenyl)-4,4',5,5'-tetrahydro-[4,4'-bithiazole]-4,4'-dicarboxylate (2*m*' )**

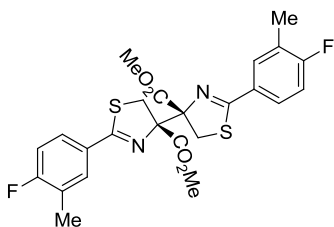

White solid, 30.8 mg, 30% yield, mp 166-167 °C; <sup>1</sup>H NMR (300 MHz, CDCl<sub>3</sub>) δ 7.74 (dd, *J* = 7.4, 2.3 Hz, 2H), 7.66-6.99 (m, 2H), 7.02 (t, *J* = 8.9 Hz, 2H), 4.12 (d, *J* = 12.2 Hz, 2H), 3.89 (d, *J* = 12.2 Hz, 2H), 3.78 (s, 6H), 2.29 (s, 6H); <sup>13</sup>C NMR (75 MHz, CDCl<sub>3</sub>) δ 171.3, 169.5, 164.7, 161.4, 131.6, 131.5, 128.2, 127.9, 127.8, 124.9, 124.6, 114.8, 114.5, 92.2, 52.9, 38.3, 14.0, 13.9 ppm; HRMS (ESI) calcd for [C<sub>24</sub>H<sub>22</sub>F<sub>2</sub>N<sub>2</sub>O<sub>4</sub>S<sub>2</sub> + H]<sup>+</sup> 505.1062, found 505.1058.

**(4*R*,4'*S*)-diethyl 2,2'-diphenyl-4,4',5,5'-tetrahydro-[4,4'-bithiazole]-4,4'-dicarboxylate (2*n*)**

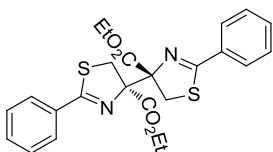

White solid, 31.3 mg, 33% yield, mp 95-96 °C; <sup>1</sup>H NMR (300 MHz, CDCl<sub>3</sub>) δ 7.75-7.73 (m, 4H), 7.52-7.17 (m, 6H), 4.60 (d, *J* = 11.6 Hz, 2H), 4.43-4.10 (m, 6H), 1.30 (t, *J* = 7.1 Hz, 6H); <sup>13</sup>C NMR (75 MHz, CDCl<sub>3</sub>) δ 171.7, 169.8, 132.4, 130.9, 128.1, 127.8, 94.2, 61.6, 38.5, 13.6 ppm; HRMS (ESI) calcd for [C<sub>24</sub>H<sub>24</sub>N<sub>2</sub>O<sub>4</sub>S<sub>2</sub> + H]<sup>+</sup> 469.1250, found 469.1245.

**(4*R*,4'*R*)-diethyl 2,2'-diphenyl-4,4',5,5'-tetrahydro-[4,4'-bithiazole]-4,4'-dicarboxylate (2*n*' )**

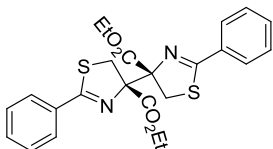

Yellow solid, 26.0 mg, 28% yield, mp 48-49 °C; <sup>1</sup>H NMR (300 MHz, CDCl<sub>3</sub>) δ 8.02-7.71 (m, 4H), 7.64-7.31 (m, 6H), 4.46-4.10 (m, 6H), 3.99 (d, *J* = 12.2 Hz, 2H), 1.21 (t, *J* = 7.1 Hz, 6H); <sup>13</sup>C NMR

(75 MHz, CDCl<sub>3</sub>)  $\delta$  170.3, 170.2, 132.4, 131.1, 128.3, 127.9, 92.3, 61.8, 38.1, 13.5 ppm; HRMS (ESI) calcd for [C<sub>24</sub>H<sub>24</sub>N<sub>2</sub>O<sub>4</sub>S<sub>2</sub> + H]<sup>+</sup> 469.1250, found 469.1246.

**(4*R*,4'*S*)-dimethyl 2,2'-di(thiophen-2-yl)-4,4',5,5'-tetrahydro-[4,4'-bithiazole]-4,4'-dicarboxylate (2o)**

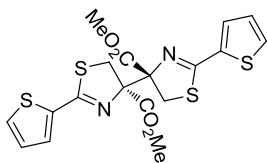

White solid, 21.7 mg, 24% yield, mp 150-151 °C; <sup>1</sup>H NMR (300 MHz, CDCl<sub>3</sub>)  $\delta$  7.37 (dd, *J* = 10.1, 4.4 Hz, 4H), 6.97 (t, *J* = 4.4 Hz, 2H), 4.54 (d, *J* = 11.6 Hz, 2H), 4.20 (d, *J* = 11.6 Hz, 2H), 3.80 (s, 6H); <sup>13</sup>C NMR (75 MHz, CDCl<sub>3</sub>)  $\delta$  170.7, 165.3, 136.3, 131.2, 130.4, 127.4, 94.0, 53.1, 39.4 ppm; HRMS (ESI) calcd for [C<sub>18</sub>H<sub>16</sub>N<sub>2</sub>O<sub>4</sub>S<sub>4</sub> + H]<sup>+</sup> 453.0066, found 453.0065.

**(4*R*,4'*S*)-dimethyl 2,2'-diphenyl-4,4',5,5'-tetrahydro-[4,4'-bioxazole]-4,4'-dicarboxylate (2r)**

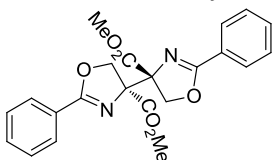

White solid, 13.3 mg, 16% yield, mp 222-223 °C; <sup>1</sup>H NMR (300 MHz, CDCl<sub>3</sub>)  $\delta$  7.99 (d, *J* = 7.5 Hz, 4H), 7.51 (t, *J* = 7.5 Hz, 2H), 7.40 (t, *J* = 7.6 Hz, 4H), 4.85 (d, *J* = 10.0 Hz, 2H), 4.66 (d, *J* = 10.0 Hz, 2H), 3.78 (s, 6H); <sup>13</sup>C NMR (75 MHz, CDCl<sub>3</sub>)  $\delta$  171.9, 167.1, 132.1, 128.9, 128.3, 126.7, 82.3, 72.5, 53.2 ppm; HRMS (ESI) calcd for [C<sub>22</sub>H<sub>20</sub>N<sub>2</sub>O<sub>6</sub> + H]<sup>+</sup> 409.1394, found 409.1399.

**(4*R*,4'*S*)-dimethyl 2,2'-bis(4-(4-methoxyphenoxy)phenyl)-4,4',5,5'-tetrahydro-[4,4'-bithiazole]-4,4'-dicarboxylate (3)**

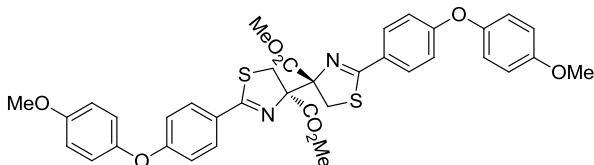

Yellow solid, 79.1 mg, 56% yield, mp 50-51 °C; <sup>1</sup>H NMR (300 MHz, CDCl<sub>3</sub>)  $\delta$  7.82-7.55 (m, 4H), 6.94 (d, *J* = 9.1 Hz, 4H), 6.90-6.78 (m, 8H), 4.54 (d, *J* = 11.7 Hz, 2H), 4.18 (d, *J* = 11.7 Hz, 2H), 3.78 (s, 6H), 3.77 (s, 6H); <sup>13</sup>C NMR (75 MHz, CDCl<sub>3</sub>)  $\delta$  171.4, 171.0, 161.5, 156.4, 148.9, 130.4, 127.0, 121.4, 116.6, 115.0, 94.6, 55.6, 53.1, 39.0 ppm; HRMS (ESI) calcd for [C<sub>36</sub>H<sub>32</sub>N<sub>2</sub>O<sub>8</sub>S<sub>2</sub> + Na]<sup>+</sup> 707.1492, found 707.1467.

**(4*R*,4'*S*)-dimethyl 2,2'-diphenyl-4,4',5,5'-tetrahydro-[4,4'-bithiazole]-4,4'-dicarboxylate (4)**

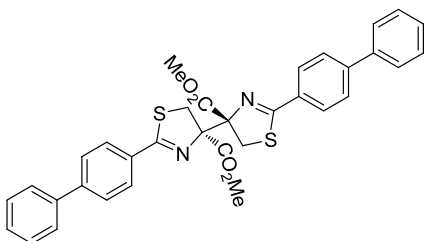

White solid, 84.1 mg, 71% yield, mp 90-91 °C; <sup>1</sup>H NMR (300 MHz, CDCl<sub>3</sub>)  $\delta$  7.97-7.73 (m, 4H),

7.68-7.48 (m, 8H), 7.47-7.30 (m, 6H), 4.62 (d,  $J = 11.8$  Hz, 2H), 4.25 (d,  $J = 11.7$  Hz, 2H), 3.82 (s, 6H);  $^{13}\text{C}$  NMR (75 MHz,  $\text{CDCl}_3$ )  $\delta$  172.1, 170.9, 144.2, 140.1, 131.7, 129.1, 128.9, 127.9, 127.1, 127.0, 94.7, 53.1, 39.0 ppm; HRMS (ESI) calcd for  $[\text{C}_{34}\text{H}_{28}\text{N}_2\text{O}_4\text{S}_2 + \text{H}]^+$  593.1563, found 593.1558.

### 2,2'-diphenyl-4,4'-bithiazole (5a)

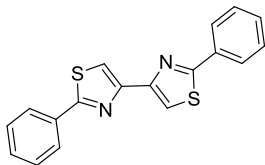

Yellow solid, 44.8 mg, 70% yield, mp 186-187 °C;  $^1\text{H}$  NMR (300 MHz,  $\text{CDCl}_3$ )  $\delta$  7.97 (dd,  $J = 7.1$ , 2.5 Hz, 4H), 7.83 (s, 2H), 7.53-7.29 (m, 6H);  $^{13}\text{C}$  NMR (75 MHz,  $\text{CDCl}_3$ )  $\delta$  168.3, 151.6, 133.6, 130.2, 129.0, 126.6, 115.3 ppm; HRMS (ESI) calcd for  $[\text{C}_{18}\text{H}_{12}\text{N}_2\text{S}_2 + \text{H}]^+$  321.0515, found 321.0520.

### 2,2'-di-*p*-tolyl-4,4'-bithiazole (5b)

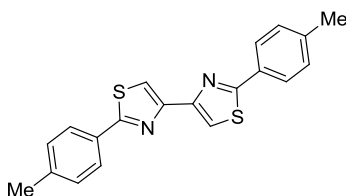

White solid, 44.8 mg, 77% yield, mp 198-199 °C;  $^1\text{H}$  NMR (300 MHz,  $\text{CDCl}_3$ )  $\delta$  7.91 (d,  $J = 7.9$  Hz, 4H), 7.85 (s, 2H), 7.25 (d,  $J = 7.8$  Hz, 4H), 2.39 (s, 6H);  $^{13}\text{C}$  NMR (75 MHz,  $\text{CDCl}_3$ )  $\delta$  168.5, 151.5, 140.4, 131.0, 129.6, 126.6, 114.8, 21.5 ppm; HRMS (ESI) calcd for  $[\text{C}_{20}\text{H}_{16}\text{N}_2\text{S}_2 + \text{H}]^+$  349.0828, found 349.0833.

### 2,2'-di-*m*-tolyl-4,4'-bithiazole (5c)

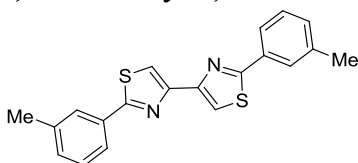

White solid, 57.8 mg, 83% yield, mp 160-161 °C;  $^1\text{H}$  NMR (300 MHz,  $\text{CDCl}_3$ )  $\delta$  7.89 (s, 2H), 7.87 (s, 2H), 7.81 (d,  $J = 7.7$  Hz, 2H), 7.34 (t,  $J = 7.6$  Hz, 2H), 7.29-7.18 (m, 2H), 2.43 (s, 6H);  $^{13}\text{C}$  NMR (75 MHz,  $\text{CDCl}_3$ )  $\delta$  168.5, 151.5, 138.7, 133.5, 131.0, 128.9, 127.2, 123.9, 115.2, 21.4 ppm; HRMS (ESI) calcd for  $[\text{C}_{20}\text{H}_{16}\text{N}_2\text{S}_2 + \text{H}]^+$  349.0828, found 349.0831.

### 2,2'-di-*o*-tolyl-4,4'-bithiazole (5d)

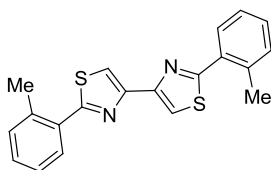

White solid, 50.4 mg, 71% yield, mp 105-106 °C;  $^1\text{H}$  NMR (300 MHz,  $\text{CDCl}_3$ )  $\delta$  7.93 (s, 2H), 7.78 (d,  $J = 7.2$  Hz, 2H), 7.33-7.25 (m, 6H), 2.68 (s, 6H);  $^{13}\text{C}$  NMR (75 MHz,  $\text{CDCl}_3$ )  $\delta$  168.1, 151.1, 136.7, 132.9, 131.6, 129.9, 129.6, 126.1, 115.7, 21.6 ppm; HRMS (ESI) calcd for  $[\text{C}_{20}\text{H}_{16}\text{N}_2\text{S}_2 + \text{H}]^+$



HJ<sup>+</sup> 349.0828, found 349.0832.

**2,2'-bis(4-fluoro-3-methylphenyl)-4,4'-bithiazole (5e)**

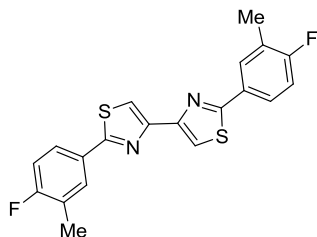

White solid, 41.5 mg, 54% yield, m.p. 213-214 °C; <sup>1</sup>H NMR (300 MHz, CDCl<sub>3</sub>) δ 7.90-7.82 (m, 3H), 7.10 (t, *J* = 8.7 Hz, 1H), 2.37 (s, 3H); <sup>13</sup>C NMR (75 MHz, CDCl<sub>3</sub>) δ 164.2, 160.9, 151.5, 129.9, 129.8, 125.9, 125.8, 125.6, 115.8, 115.5, 115.1, 14.6 ppm; HRMS(ESI) calcd for [C<sub>20</sub>H<sub>14</sub>F<sub>2</sub>N<sub>2</sub>S<sub>2</sub>+ Na]<sup>+</sup> 407.0459, found 407.0467.

**2,2'-di(thiophen-2-yl)-4,4'-bithiazole (5f)**

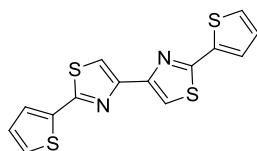

White solid, 44.4 mg, 67% yield, mp 185-186 °C; <sup>1</sup>H NMR (300 MHz, CDCl<sub>3</sub>) δ 7.82 (s, 2H), 7.56 (d, *J* = 3.7 Hz, 2H), 7.42 (d, *J* = 5.1 Hz, 2H), 7.20-6.99 (m, 2H); <sup>13</sup>C NMR (75 MHz, CDCl<sub>3</sub>) δ 161.9, 150.7, 137.2, 127.9, 127.6, 126.8, 114.9 ppm; HRMS (ESI) calcd for [C<sub>14</sub>H<sub>8</sub>N<sub>2</sub>S<sub>4</sub> + H]<sup>+</sup> 332.9643, found 332.9641.

**References**

1. T.-S. Kim, Y.-J. Lee, B.-S. Jeong, H.-G. Park and S.-S. Jew, *J. Org. Chem.* 2006, **71**, 8276.
2. H. Emten äs, L. Alderin and F. Almqvist, *J. Org. Chem.* 2001, **66**, 6756.
3. I. Güell and X. Ribas, *Eur. J. Org. Chem.* 2004, 3212.
4. Q. Liang, P. Xing, Z. Huang, J. Dong, K. B. Sharpless, X. Li and B. Jiang, *Org. Lett.* 2015, **17**, 1942.
5. R. Oliveira, R. C. Guedes, P. Meireles, I. S. Albuquerque, L. M. Gonçalves, E. Pires, M. R. Bronze, J. Gut, P. J. Rosenthal, M. Prudêncio, R. Moreira, P. M. O' Neill and F. Lopes, *J. Med. Chem.* 2014, **57**, 4916.
6. R. Chicharro, S. D. Castro, J. L. Reino and V. J. Ar án, *Eur. J. Org. Chem.* 2003, 2314.

# <sup>1</sup>H NMR and <sup>13</sup>C NMR Spectra of Title Compounds

7.7654  
7.7611  
7.7557  
7.7452  
7.7383  
7.7327  
7.3925  
7.3765  
7.3684  
7.3390  
7.3362  
7.3316  
7.3170  
7.3112  
7.3049  
7.2881  
7.2830  
7.2591

4.5908  
4.5518  
4.2297  
4.1907  
-3.8054

-0.0000

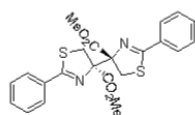

**2a**

<sup>1</sup>H NMR (300 MHz, CDCl<sub>3</sub>)

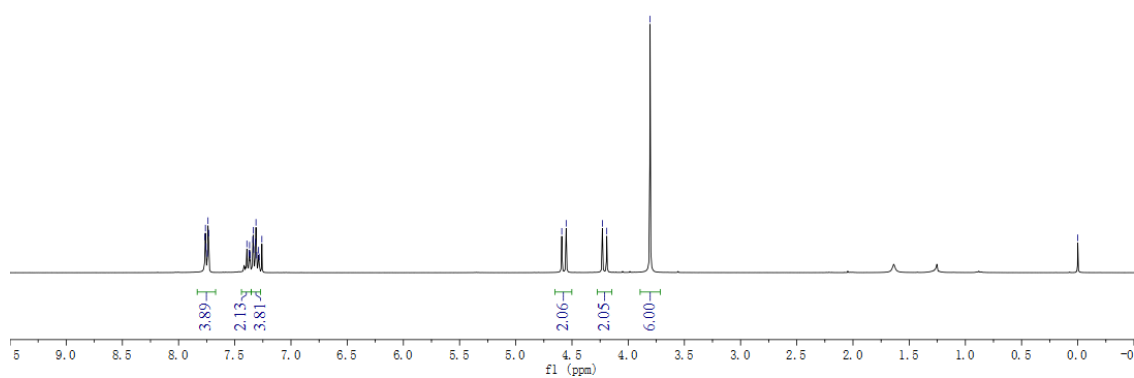

172.50  
170.88

132.82  
131.49  
128.59  
128.36

94.68

77.60  
77.18  
76.75

53.10

38.91

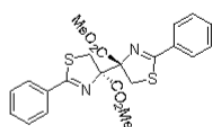

**2a**

<sup>13</sup>C NMR (75 MHz, CDCl<sub>3</sub>)

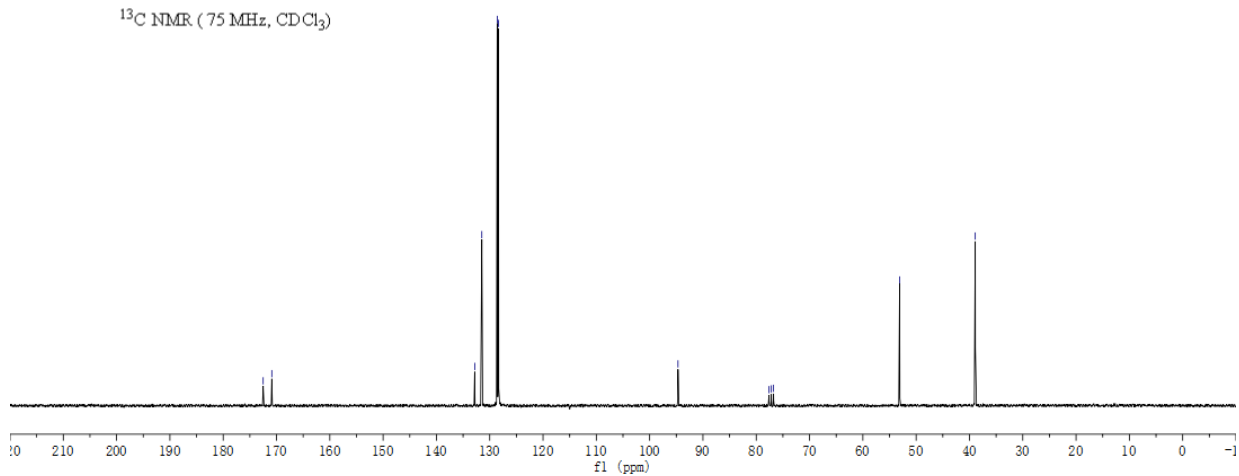

7.8871  
7.8832  
7.8779  
7.8681  
7.8603  
7.8545  
7.4842  
7.4652  
7.4601  
7.4549  
7.4268  
7.4071  
7.4013  
7.3783  
7.3729  
7.2612

4.1606  
4.1198  
3.9334  
3.8926  
3.7720

-0.0001

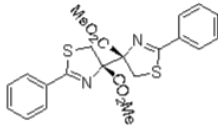

2a'

<sup>1</sup>H NMR (300 MHz, CDCl<sub>3</sub>)

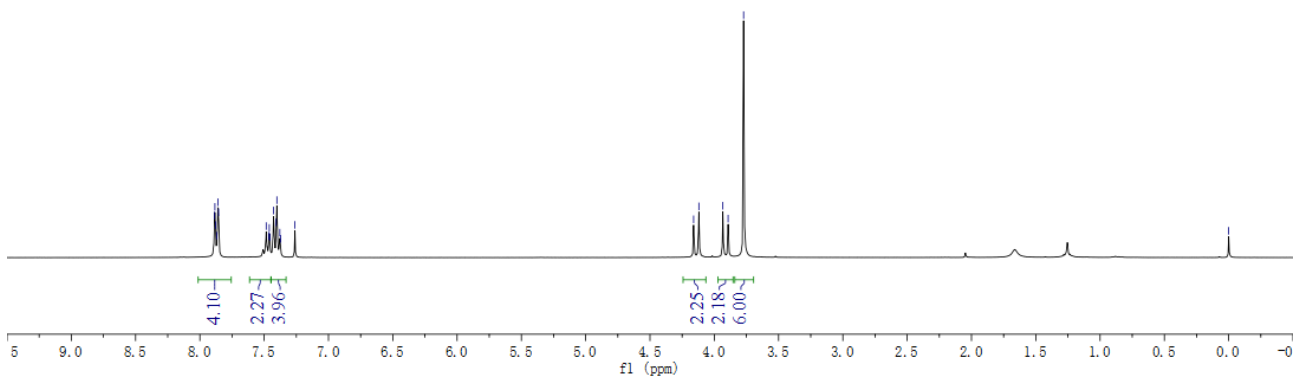

171.79  
171.03

132.83  
131.73  
128.77  
128.46

92.79

77.50  
77.08  
76.66

53.31

38.59

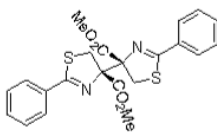

2a'

<sup>13</sup>C NMR (75 MHz, CDCl<sub>3</sub>)

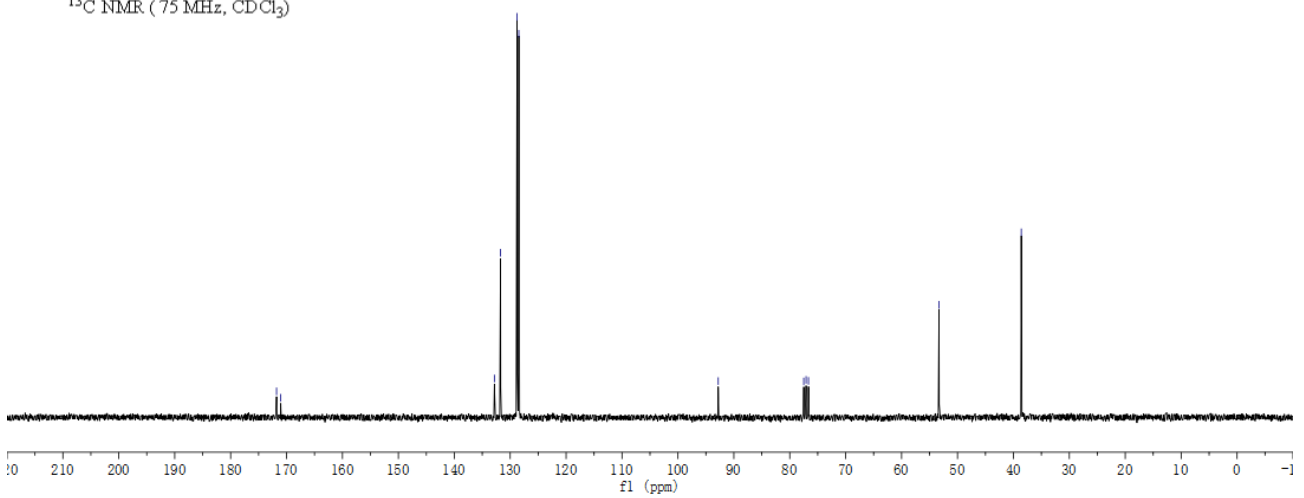

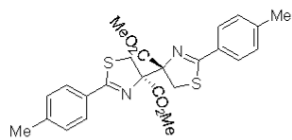

2b

$^1\text{H NMR}$  (300 MHz,  $\text{CDCl}_3$ )

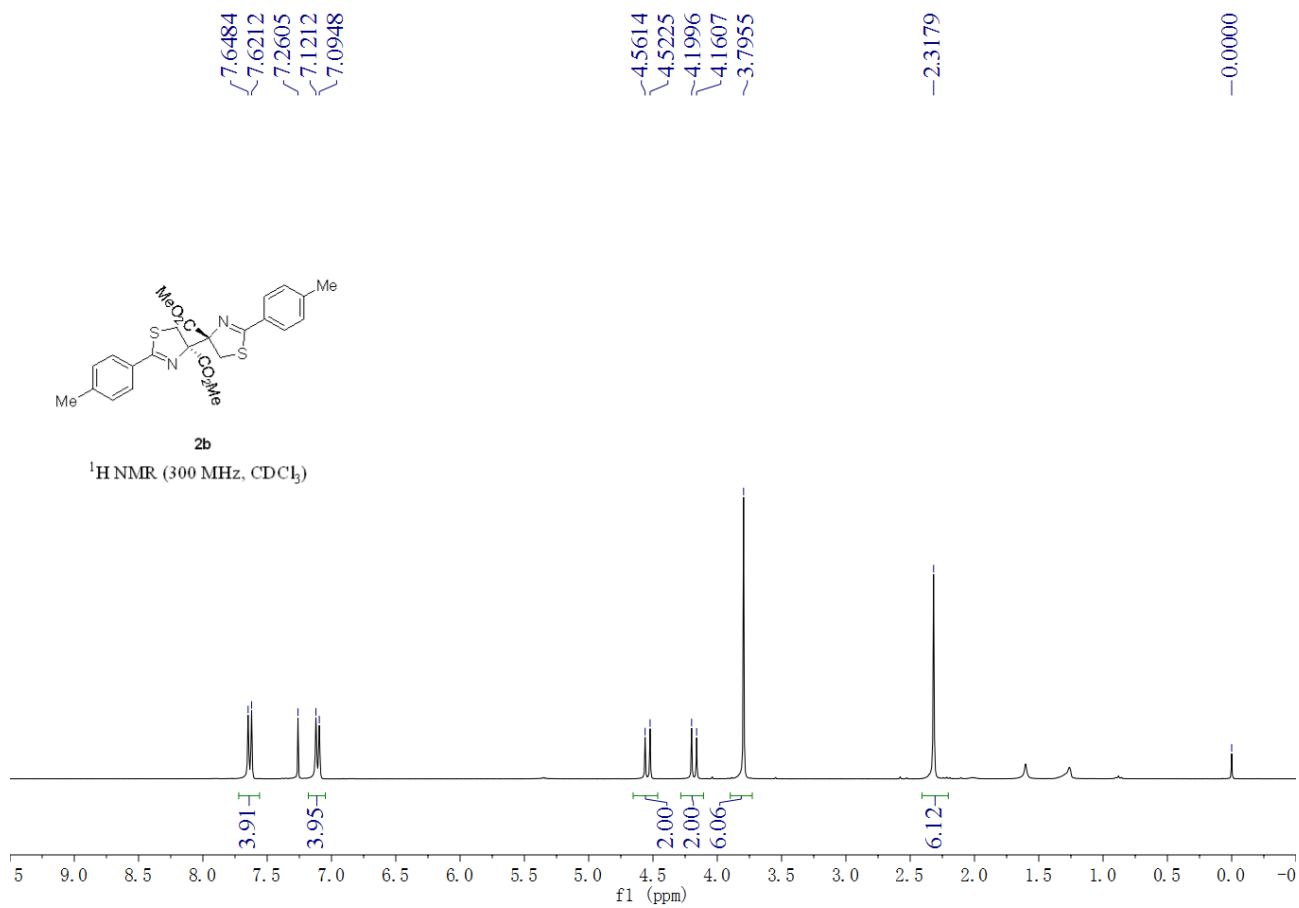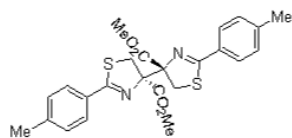

2b

$^{13}\text{C NMR}$  (75 MHz,  $\text{CDCl}_3$ )

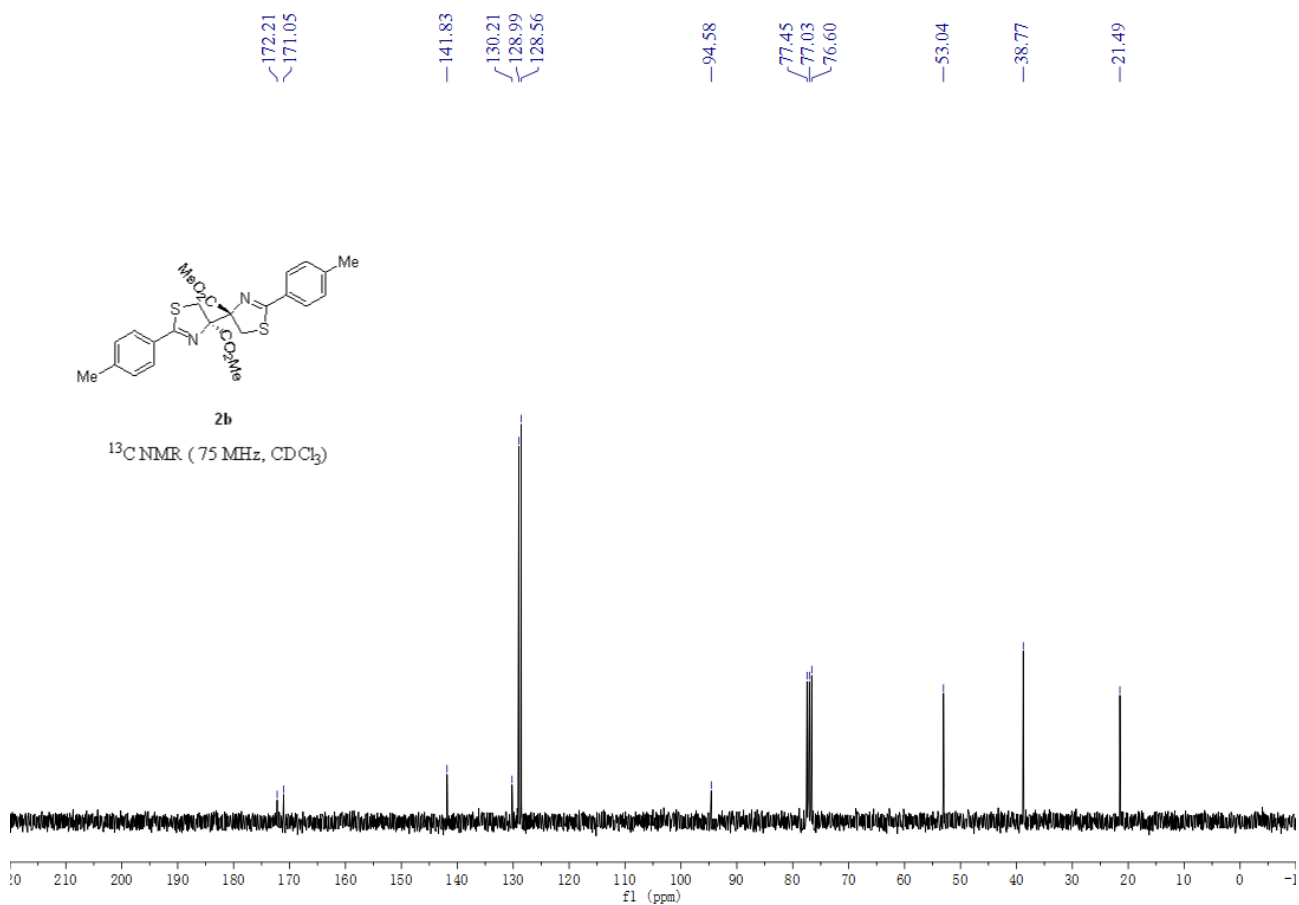

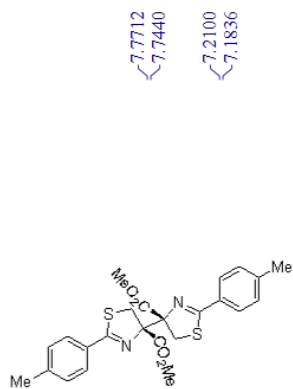

**2b'**

<sup>1</sup>H NMR (300 MHz, CDCl<sub>3</sub>)

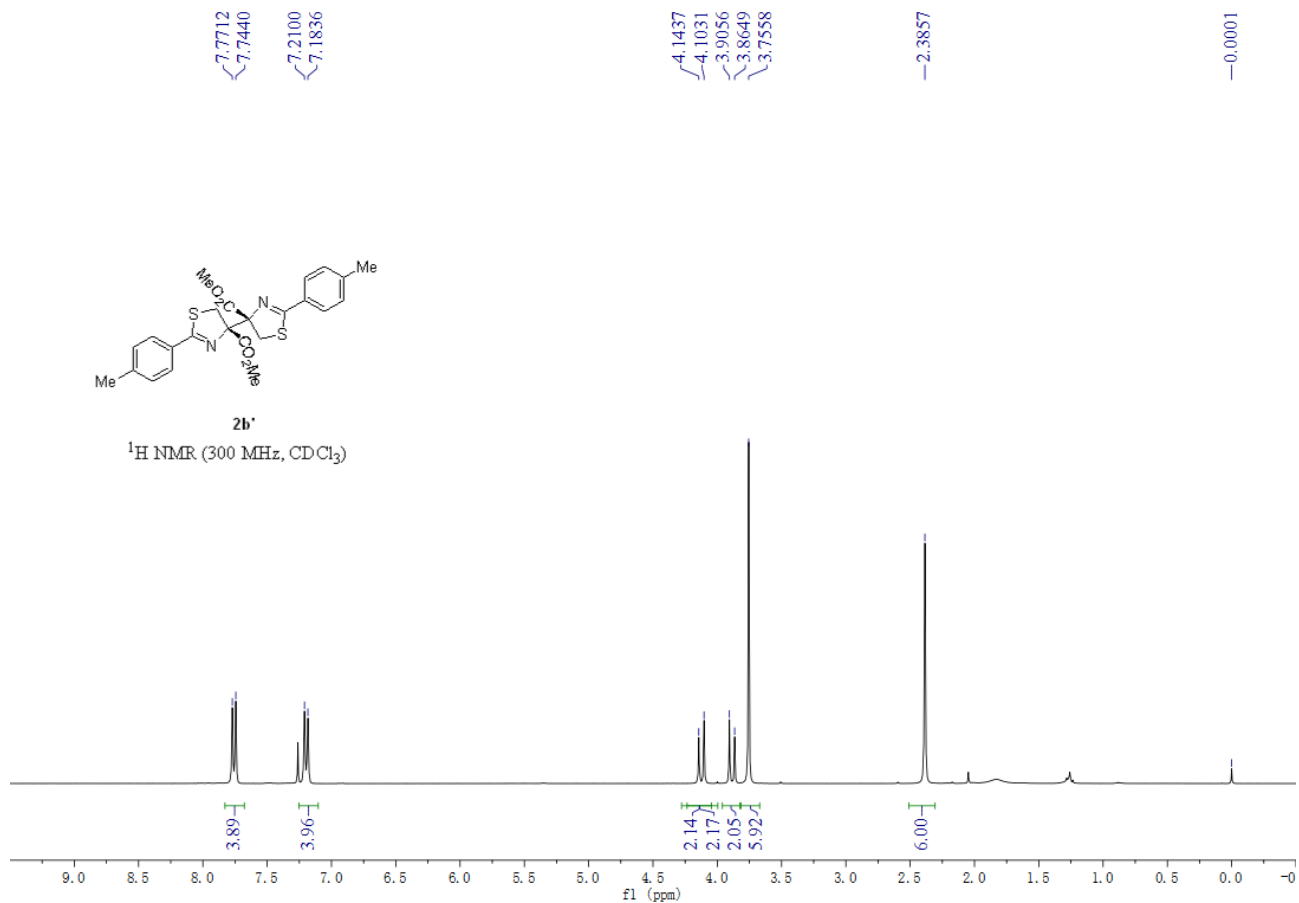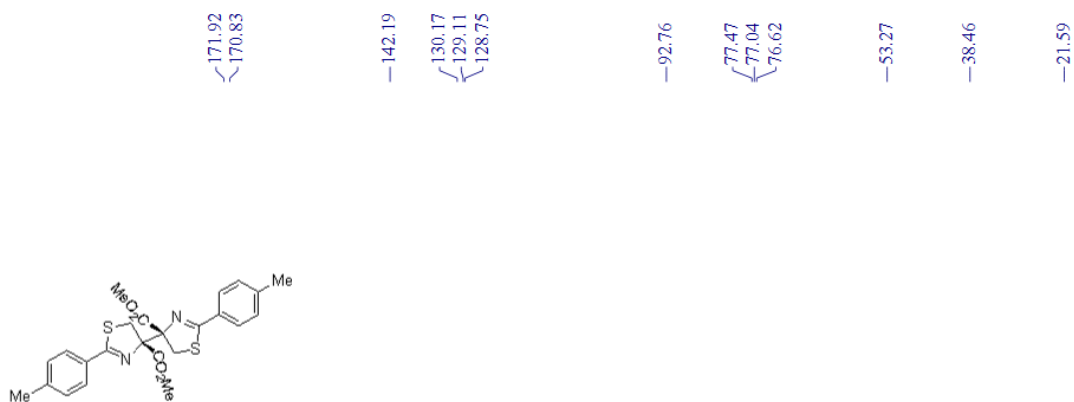

**2b'**

<sup>13</sup>C NMR (75 MHz, CDCl<sub>3</sub>)

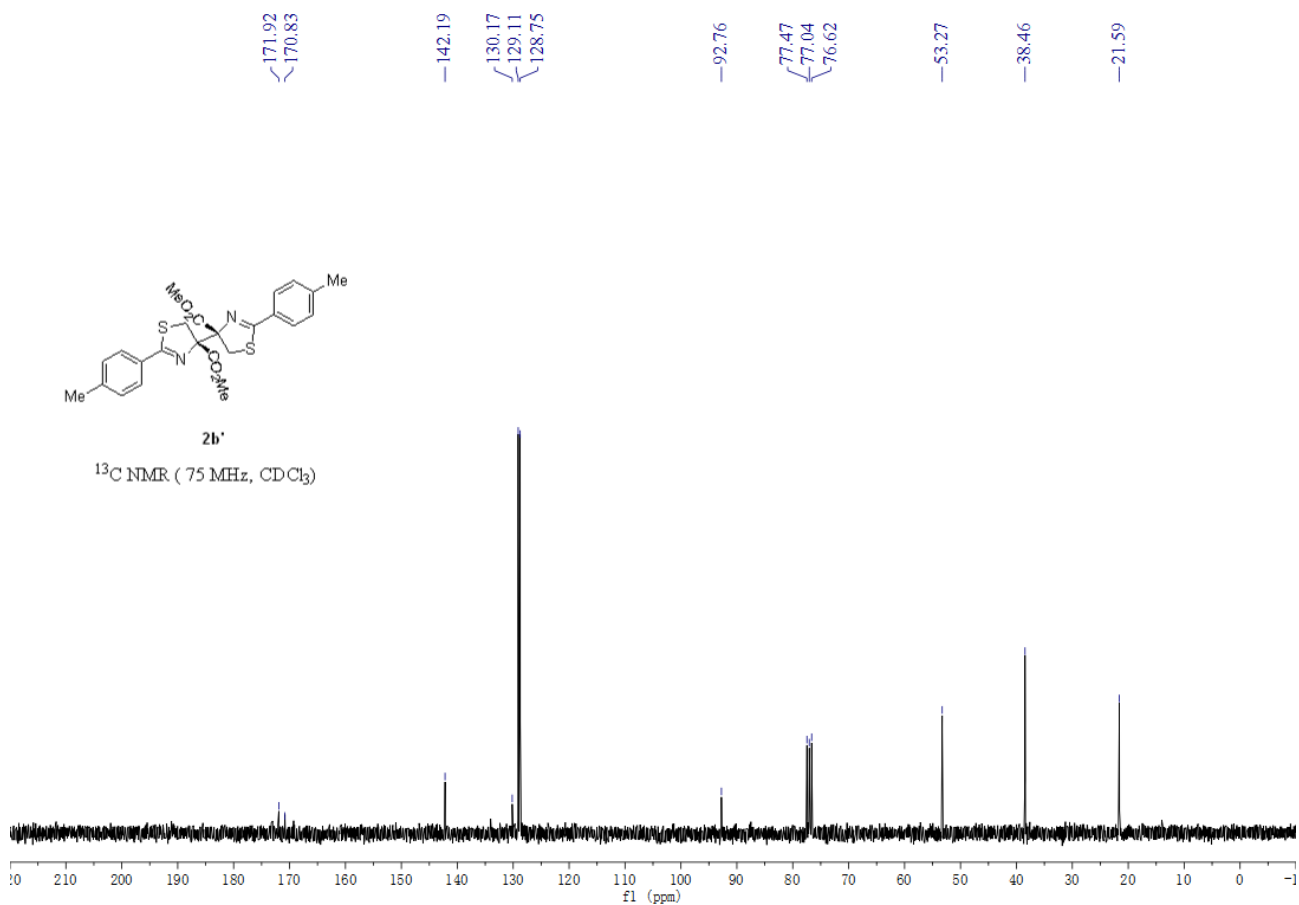

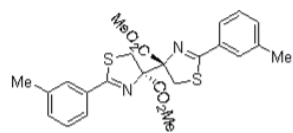

2c

$^1\text{H NMR}$  (300 MHz,  $\text{CDCl}_3$ )

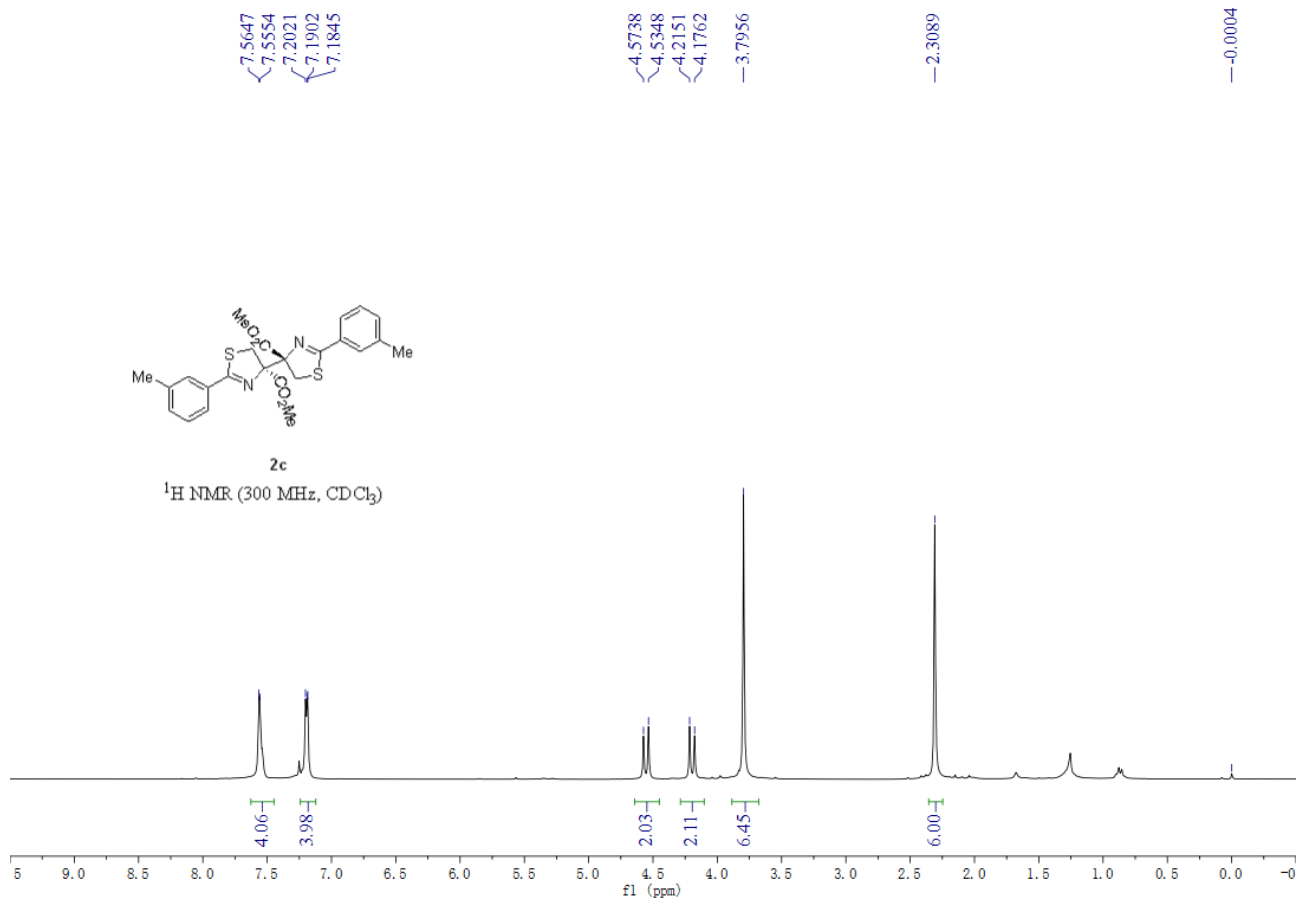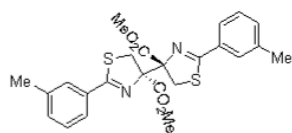

2c

$^{13}\text{C NMR}$  (75 MHz,  $\text{CDCl}_3$ )

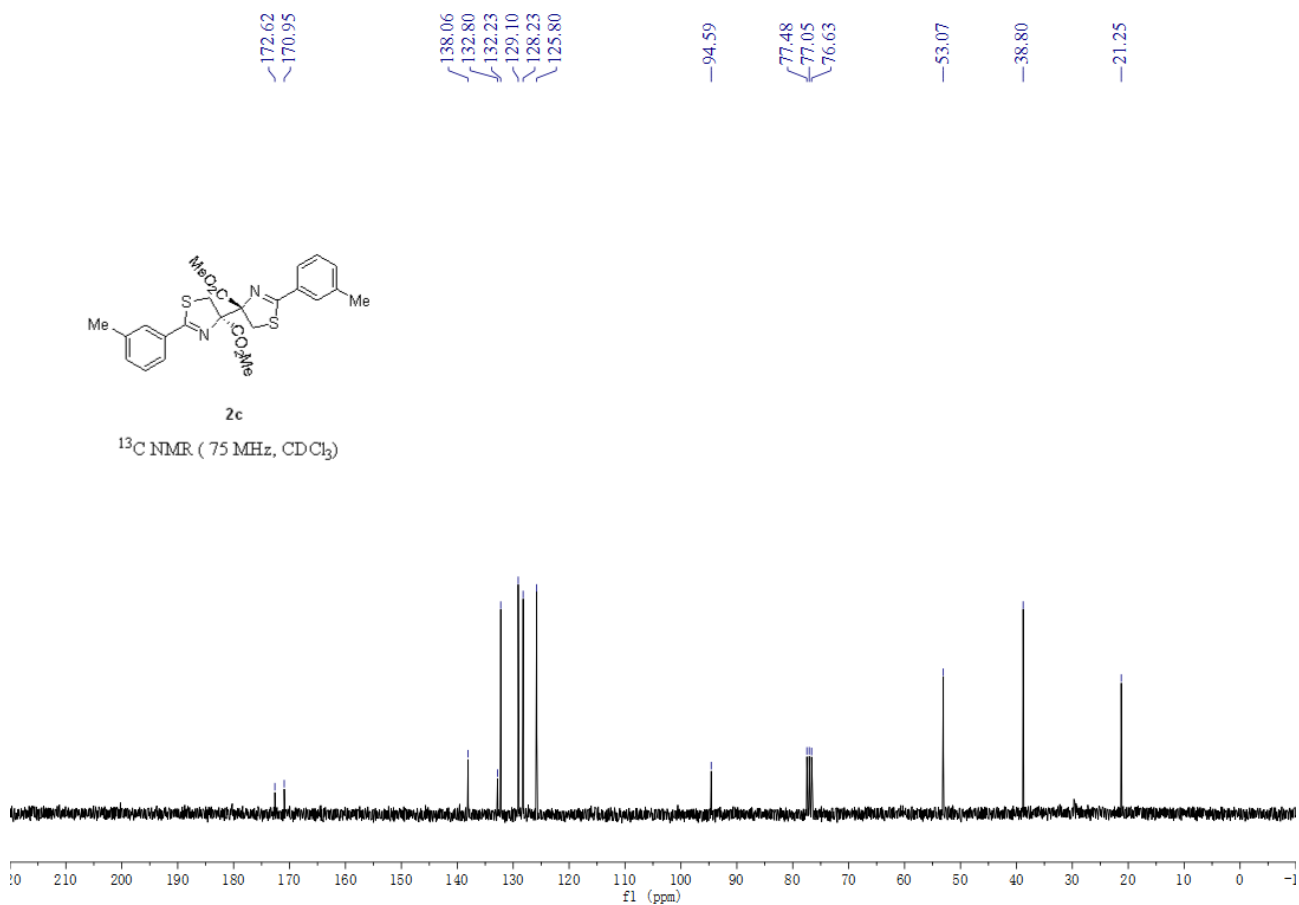

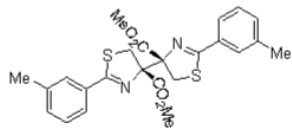

2c'

$^1\text{H NMR}$  (300 MHz,  $\text{CDCl}_3$ )

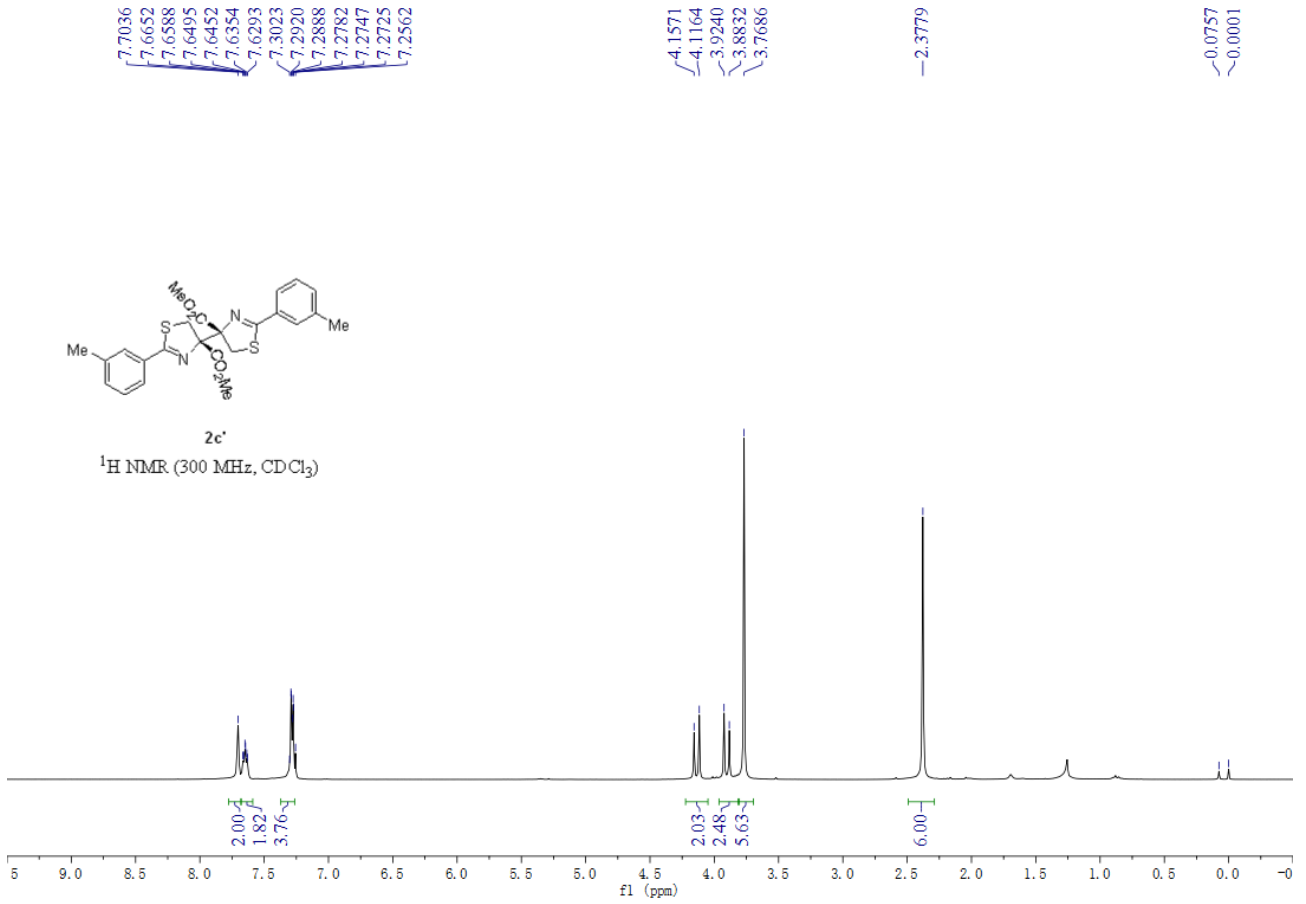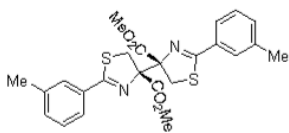

2c'

$^{13}\text{C NMR}$  (75 MHz,  $\text{CDCl}_3$ )

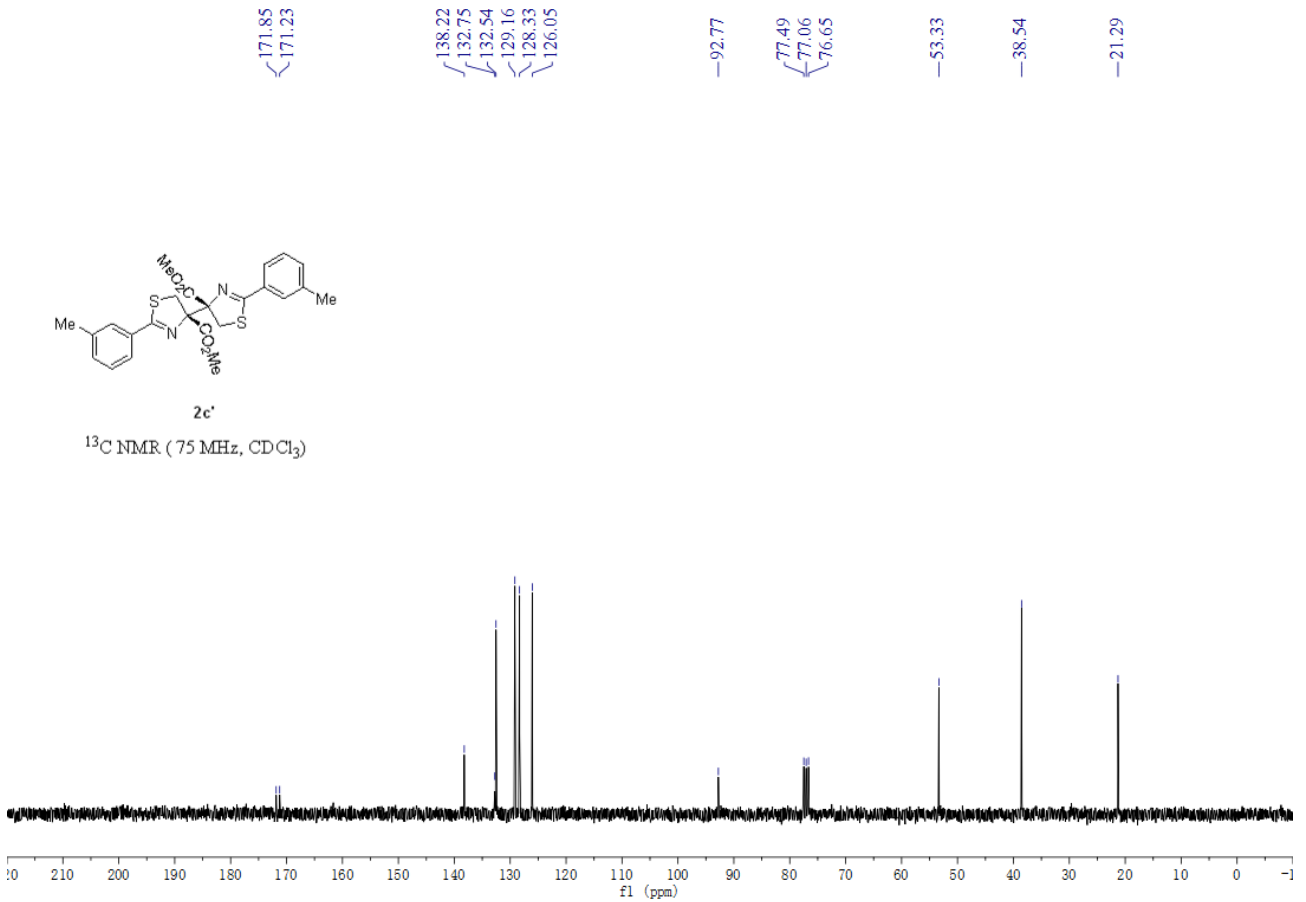

7.5284  
7.5220  
7.5003  
7.4968  
7.2866  
7.2808  
7.2611  
7.2572  
7.2008  
7.1767  
7.1554

4.5036  
4.4648  
4.1965  
4.1575  
3.8201

-2.4503

-0.0002

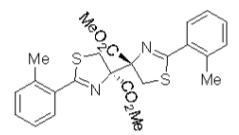

2d

<sup>1</sup>H NMR (300 MHz, CDCl<sub>3</sub>)

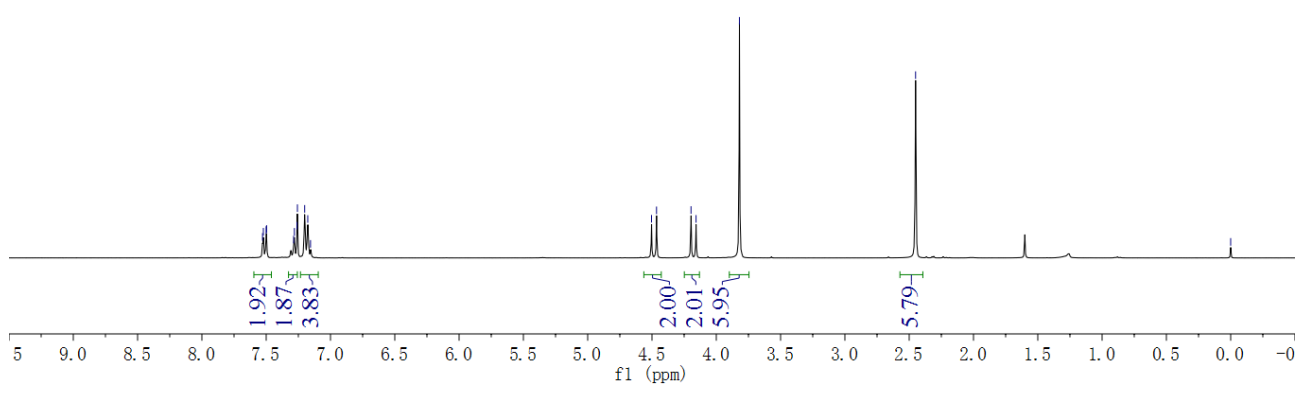

173.02  
170.71

137.54  
132.27  
131.34  
130.31  
129.88  
125.69

-95.48

77.46  
77.04  
76.61

-53.08

-39.05

-21.38

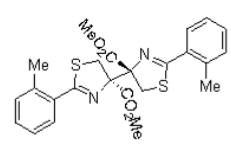

2d

<sup>13</sup>C NMR (75 MHz, CDCl<sub>3</sub>)

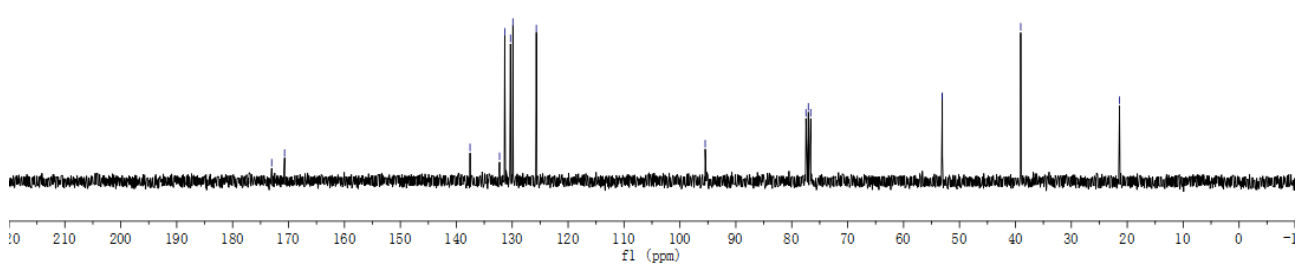



7.5873  
7.5830  
7.5625  
7.5570  
7.3400  
7.3351  
7.3164  
7.3109  
7.2906  
7.2855  
7.2575  
7.2408  
7.2349  
7.2181  
7.2111  
7.2052  
7.1859  
7.1808

4.0783  
4.0379  
3.9183  
3.8778  
3.7997

-2.5782

-0.0001

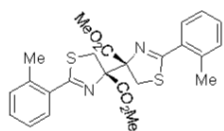

2d'

<sup>1</sup>H NMR (300 MHz, CDCl<sub>3</sub>)

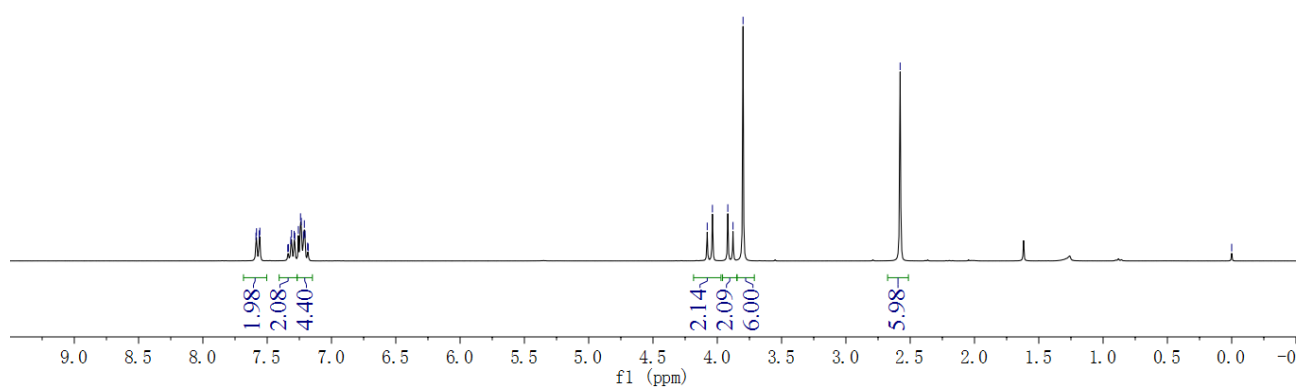

171.83  
171.36

137.97  
132.32  
131.35  
130.40  
130.00  
125.64

-93.67

77.47  
77.05  
76.62

-53.22

-38.73

-21.24

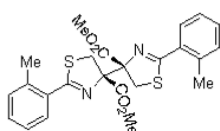

2d'

<sup>13</sup>C NMR (75 MHz, CDCl<sub>3</sub>)

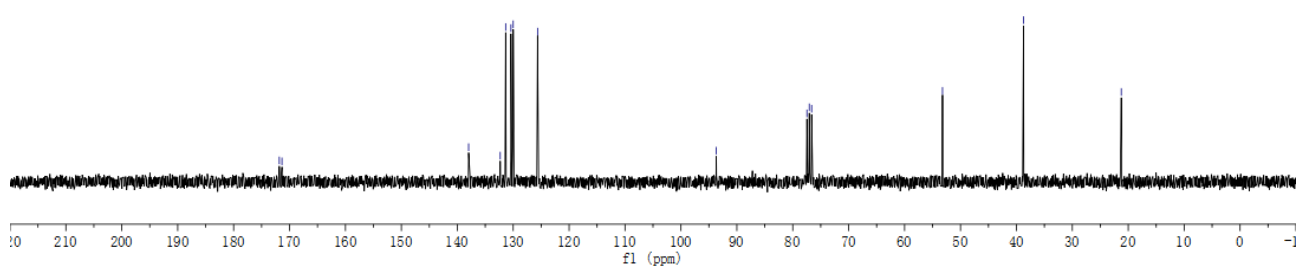

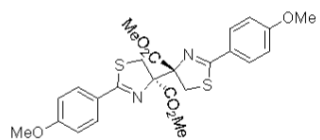

**2e**

<sup>1</sup>H NMR (300 MHz, CDCl<sub>3</sub>)

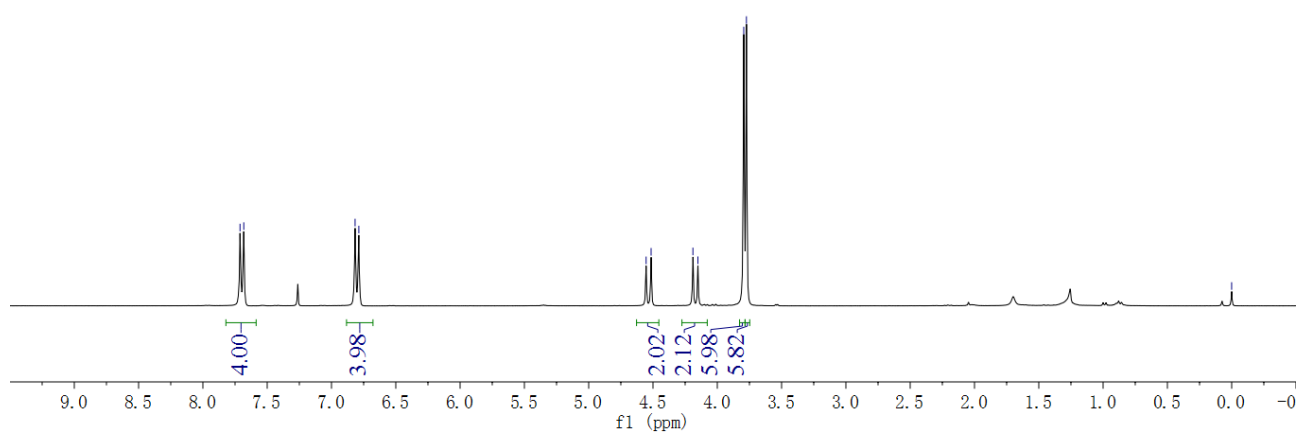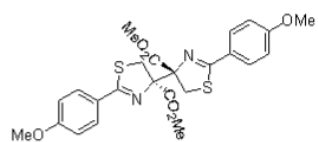

**2e**

<sup>13</sup>C NMR (75 MHz, CDCl<sub>3</sub>)

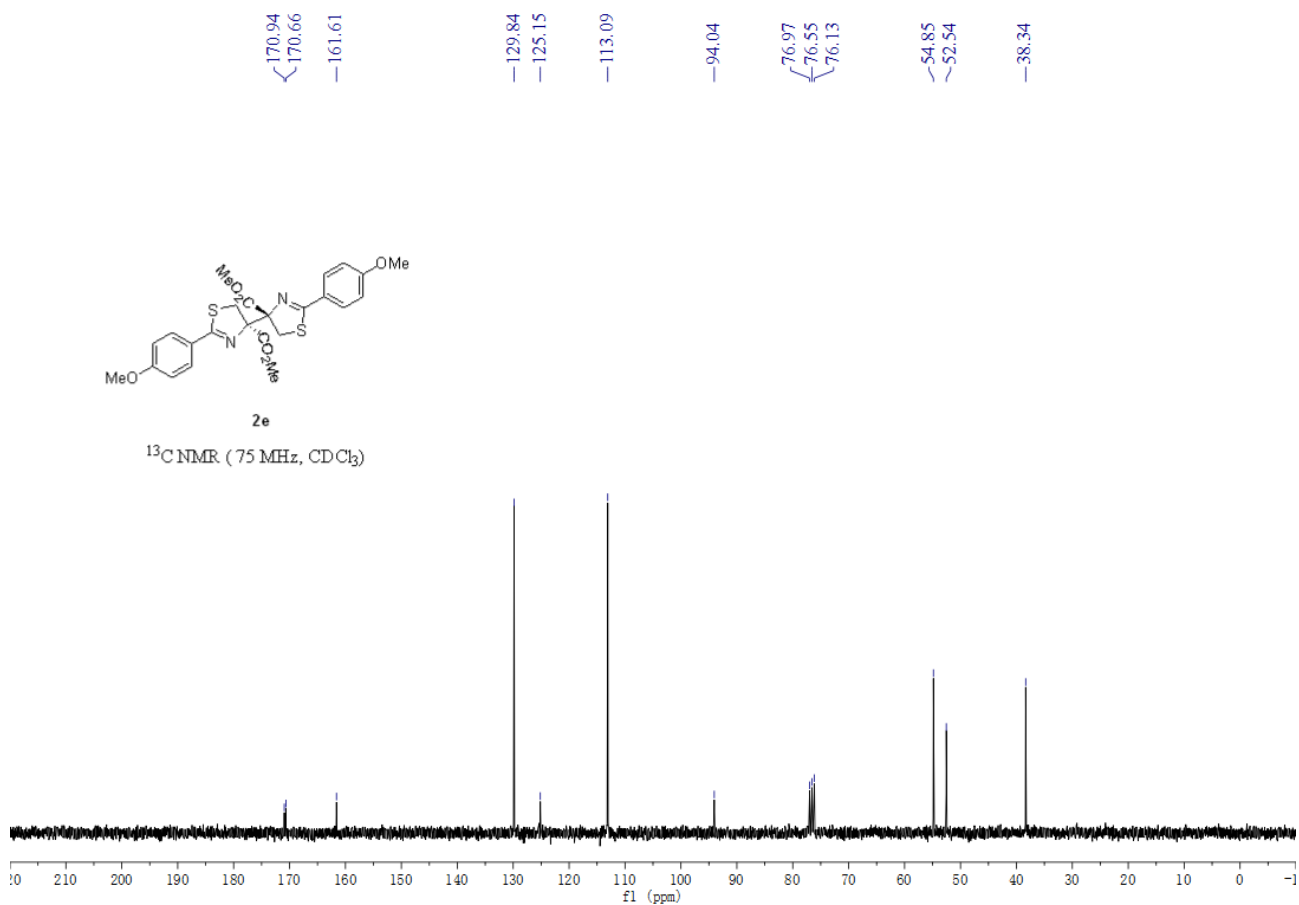

7.8344  
7.8062

6.9076  
6.8794

4.1314  
4.0908  
3.8919  
3.8518  
3.8393  
3.7547

-0.0002

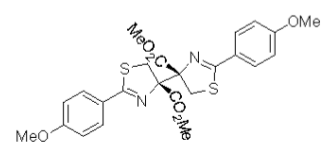

2e'

<sup>1</sup>H NMR (300 MHz, CDCl<sub>3</sub>)

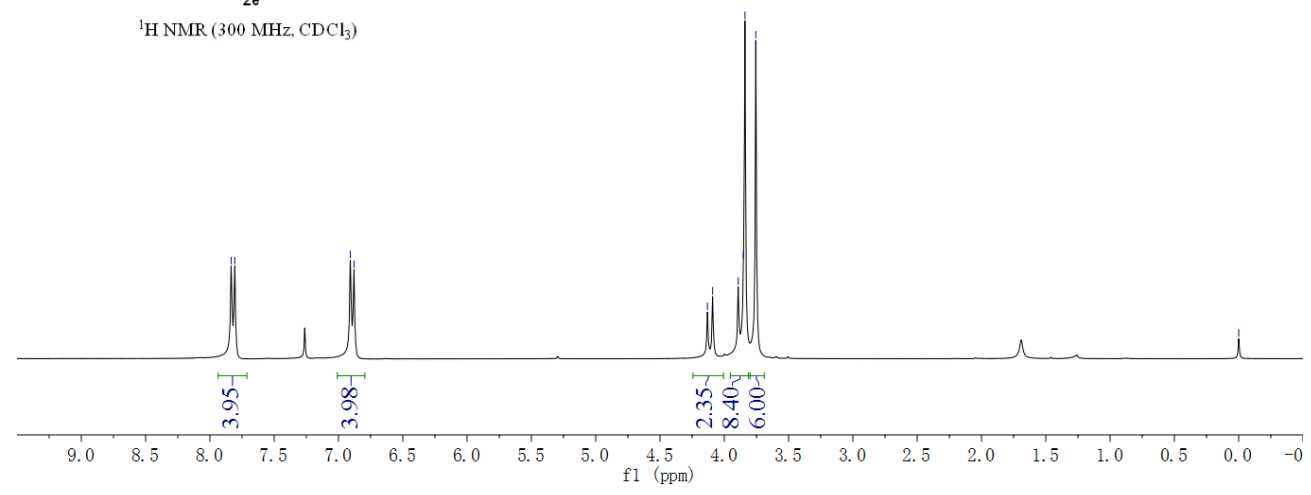

172.01  
169.97  
162.37

130.54  
125.68

113.70

92.75

77.46  
77.03  
76.61

55.42  
53.22

38.56

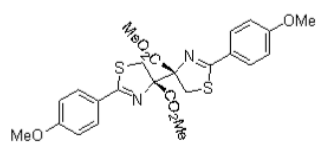

2e'

<sup>13</sup>C NMR (75 MHz, CDCl<sub>3</sub>)

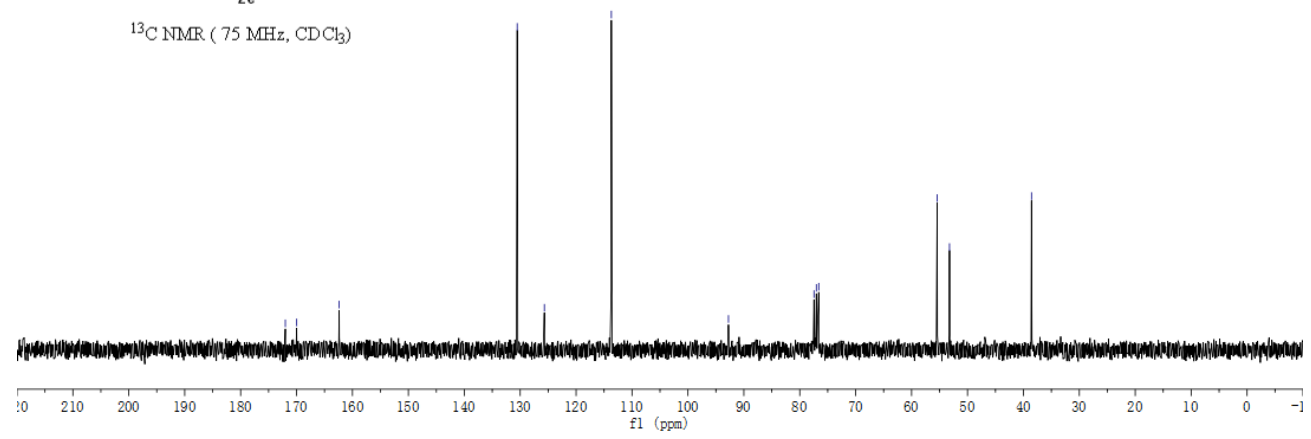

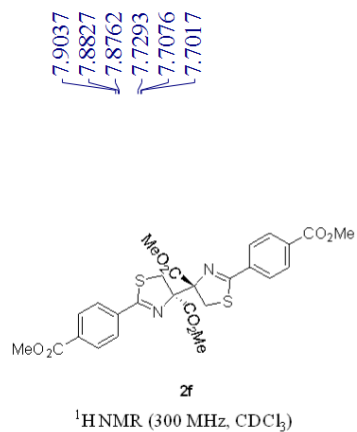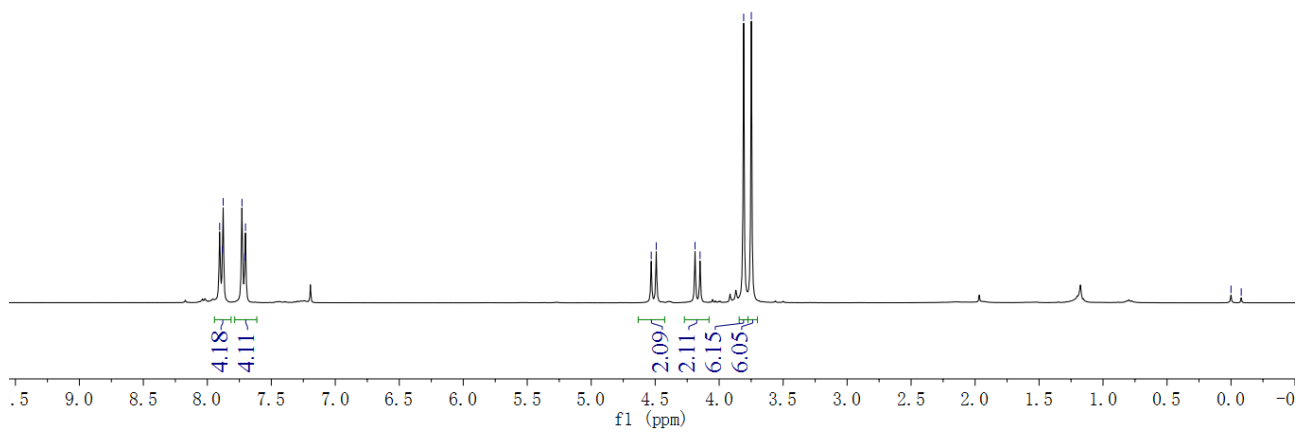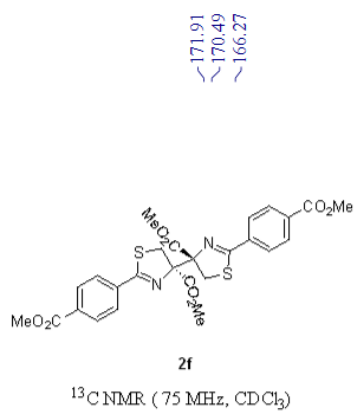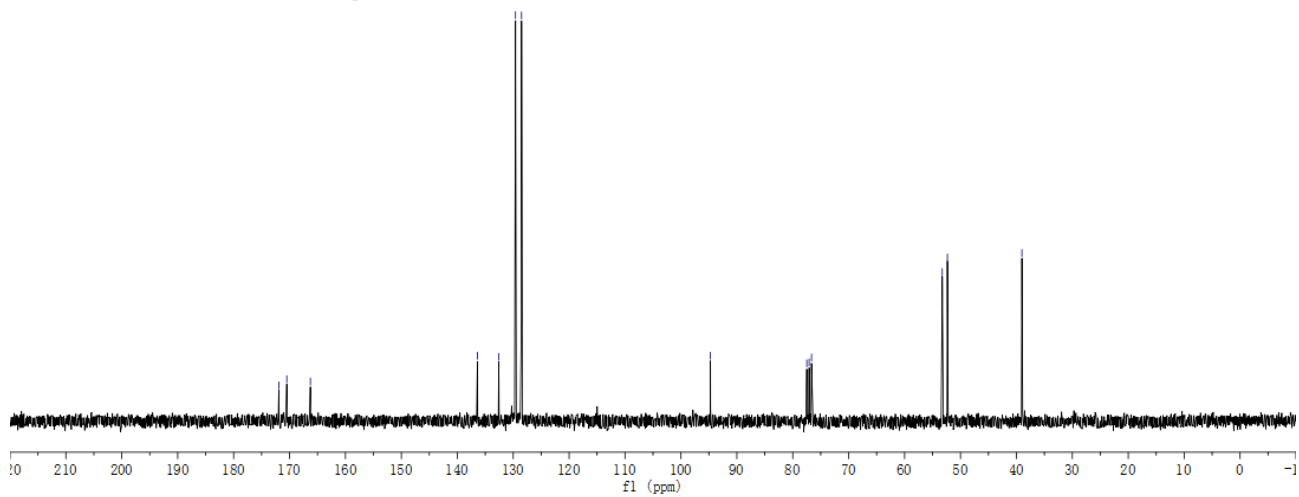

7.8063  
7.7801  
7.7683  
7.7485  
7.7389  
7.7202

4.5393  
4.5000  
4.1972  
4.1579  
3.7459  
3.7352  
3.7214

2.4755  
2.4647  
2.4510

0.0004  
-0.0108

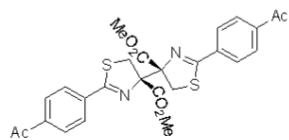

2g

<sup>1</sup>H NMR (300 MHz, CDCl<sub>3</sub>)

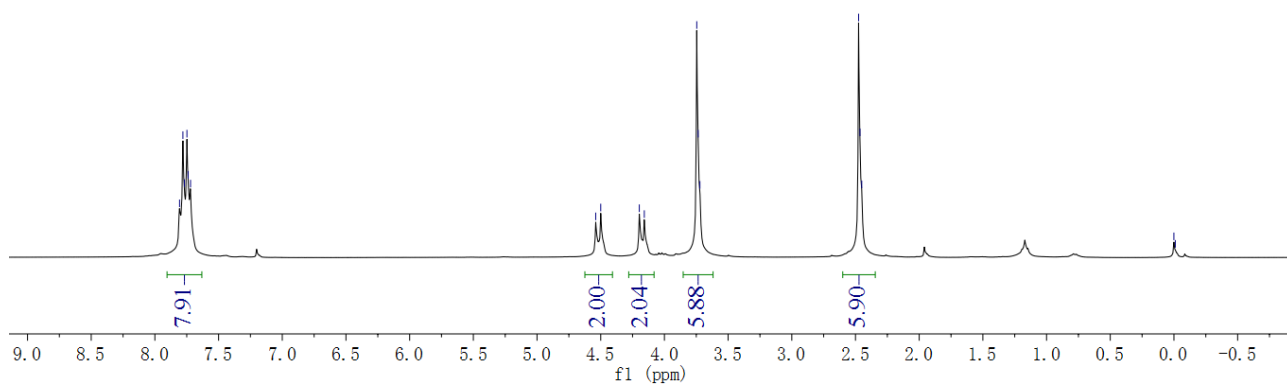

197.39

171.79  
170.44

139.04  
136.42  
128.75  
128.28

94.73

77.53  
77.11  
76.69

53.26

39.03

26.75

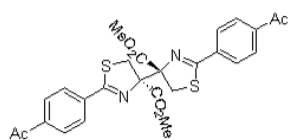

2g

<sup>13</sup>C NMR (75 MHz, CDCl<sub>3</sub>)

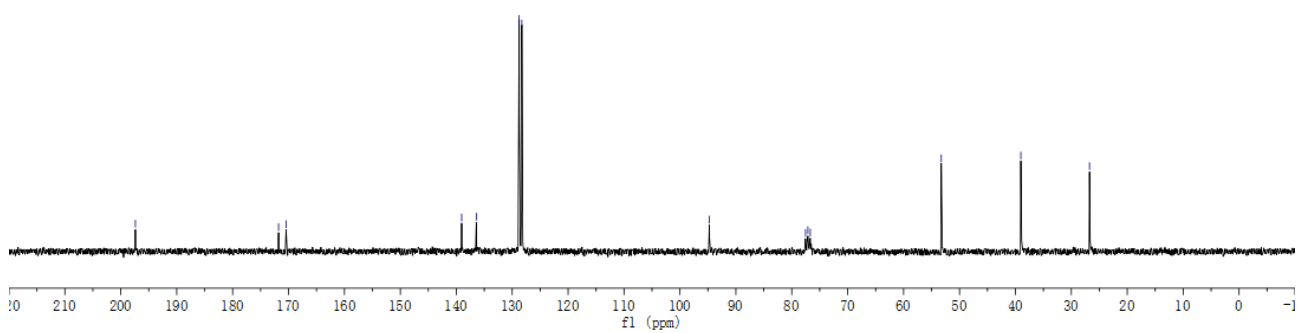

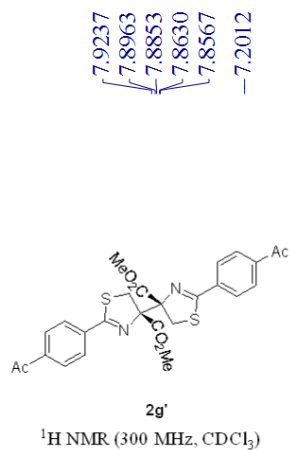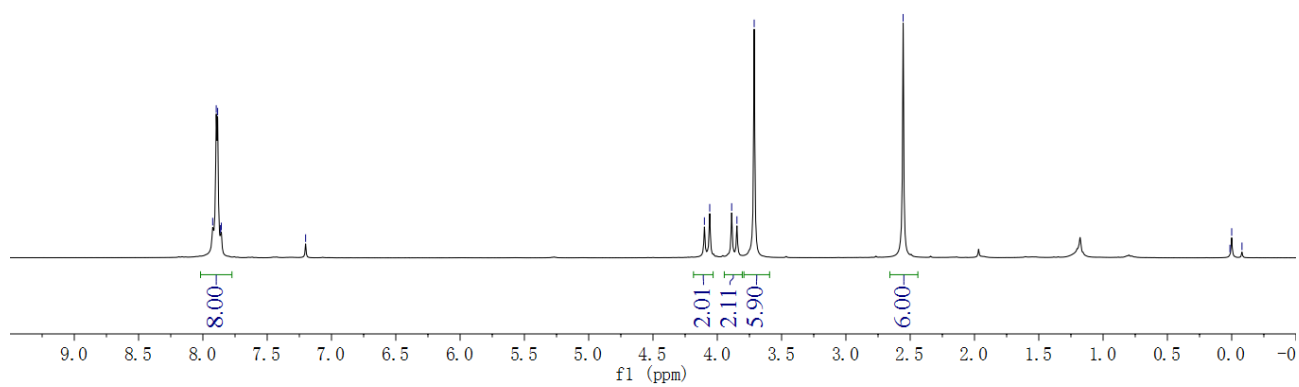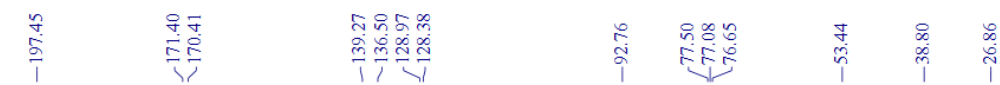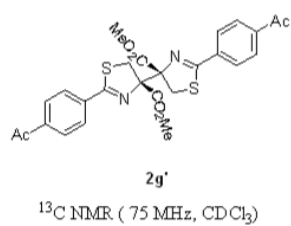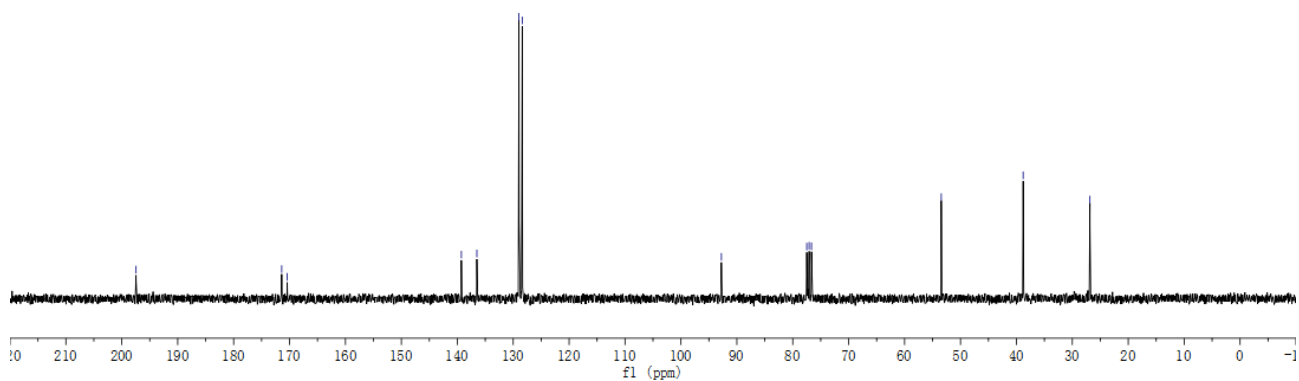

7.7675  
7.7604  
7.7490  
7.7382  
7.7273  
7.7203  
7.2623  
7.0224  
7.0154  
7.0031  
6.9936  
6.9715  
6.9648

4.5753  
4.5363  
4.2299  
4.1908  
~3.8094

-0.0004

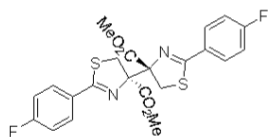

2h

<sup>1</sup>H NMR (300 MHz, CDCl<sub>3</sub>)

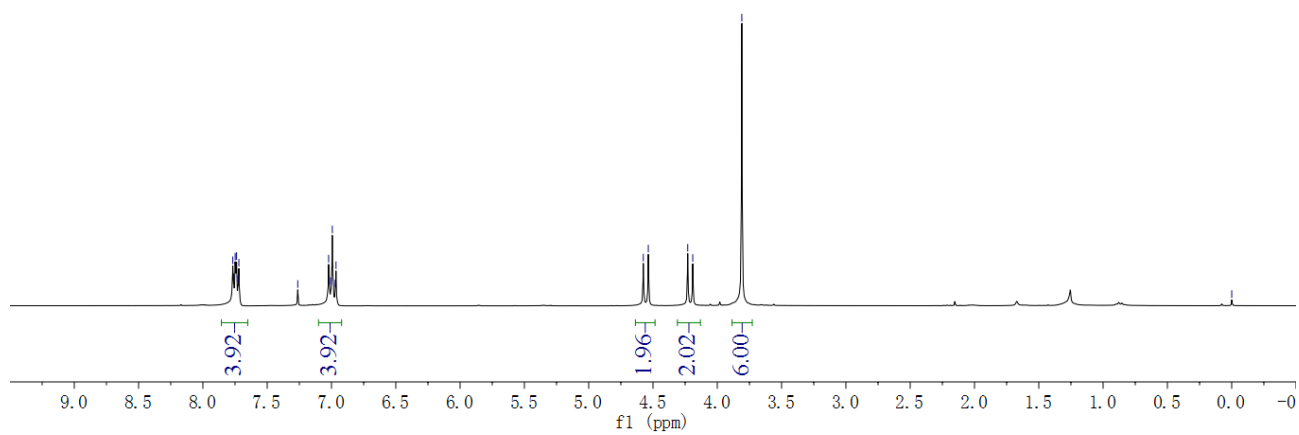

171.16  
170.74  
166.37  
163.02

130.80  
130.68  
129.02

115.61  
115.32

-94.60

77.49  
77.05  
76.63

-53.16

-39.09

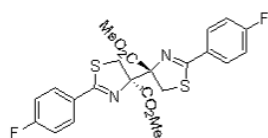

2h

<sup>13</sup>C NMR (75 MHz, CDCl<sub>3</sub>)

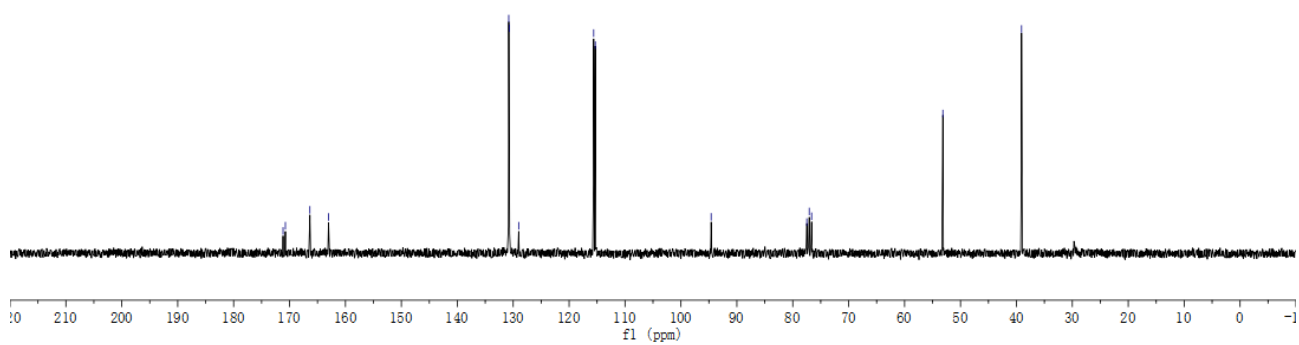

7.6854  
7.6569  
7.2991  
7.2707

4.5690  
4.5299  
4.2304  
4.1911  
3.8101

-0.0003

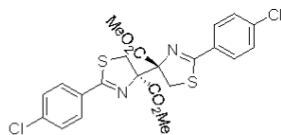

2i

<sup>1</sup>H NMR (300 MHz, CDCl<sub>3</sub>)

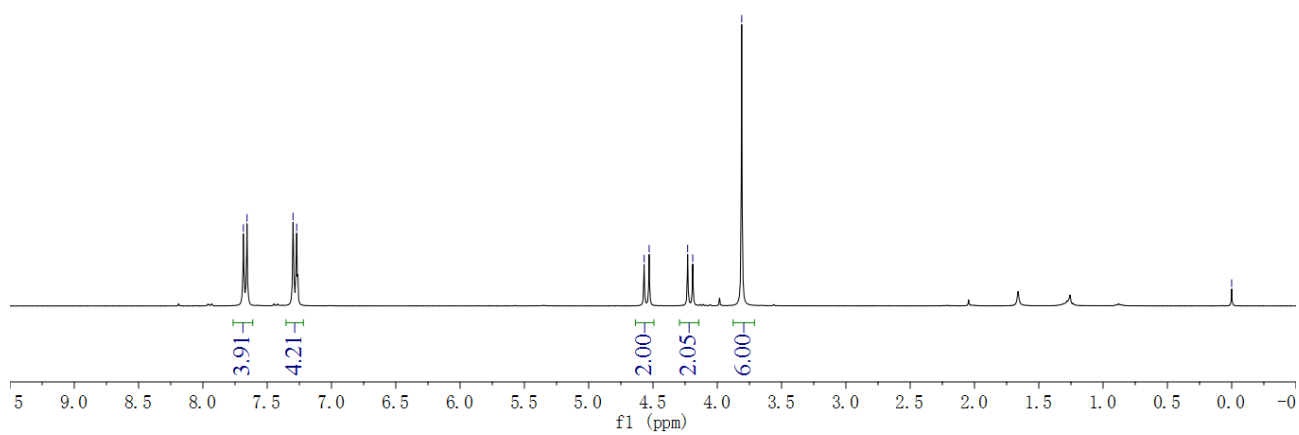

171.35  
170.62

137.69  
131.12  
129.84  
128.63

-94.60

77.46  
77.03  
76.61

-53.18

-39.03

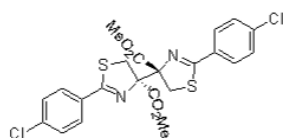

2i

<sup>13</sup>C NMR (75 MHz, CDCl<sub>3</sub>)

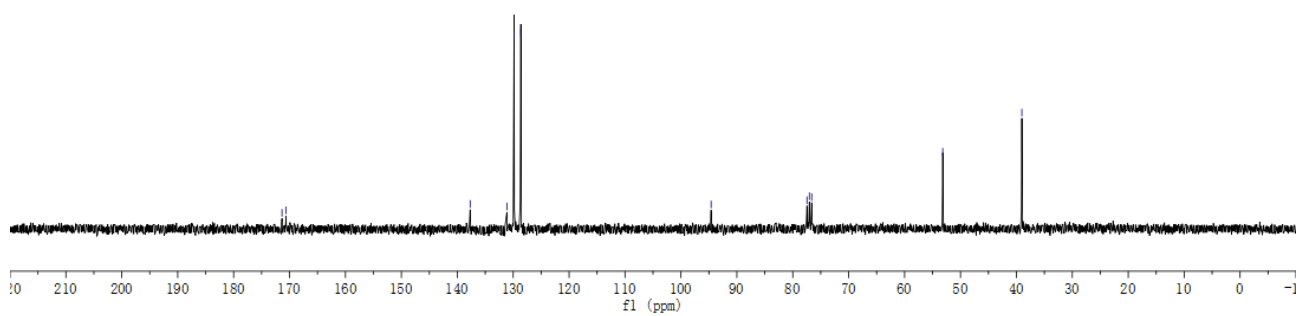



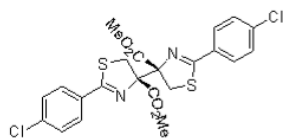

2i'

<sup>1</sup>H NMR (300 MHz, CDCl<sub>3</sub>)

7.8130  
7.7845  
7.3929  
7.3645

4.1371  
4.0962  
3.9238  
3.8829  
3.7710

-0.0001

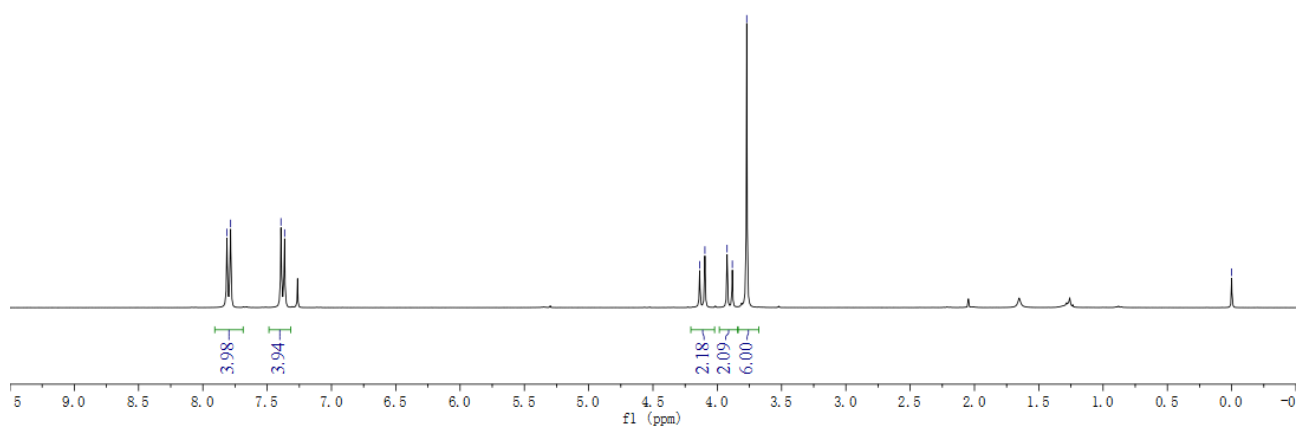

171.56  
169.99

137.95  
131.19  
130.04  
128.74

92.68

77.46  
77.04  
76.61

53.37

38.81

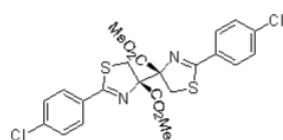

2i'

<sup>13</sup>C NMR (75 MHz, CDCl<sub>3</sub>)

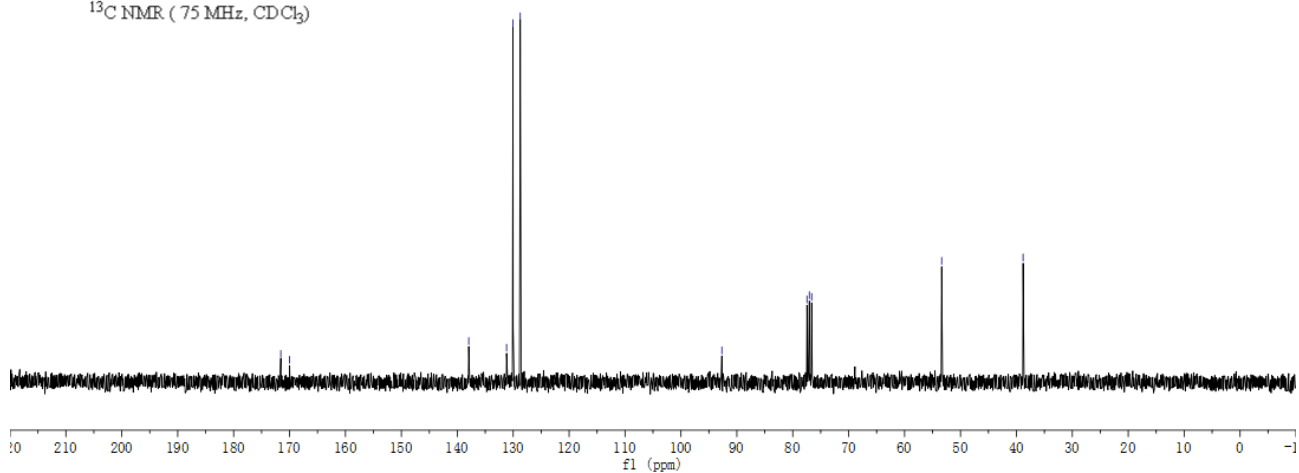

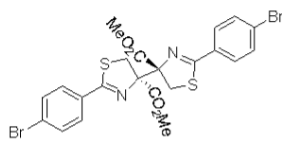

2j

$^1\text{H NMR}$  (300 MHz,  $\text{CDCl}_3$ )

7.6122  
7.5838  
7.4580  
7.4296

4.5654  
4.5261  
4.2291  
4.1900  
3.8083

-0.0001

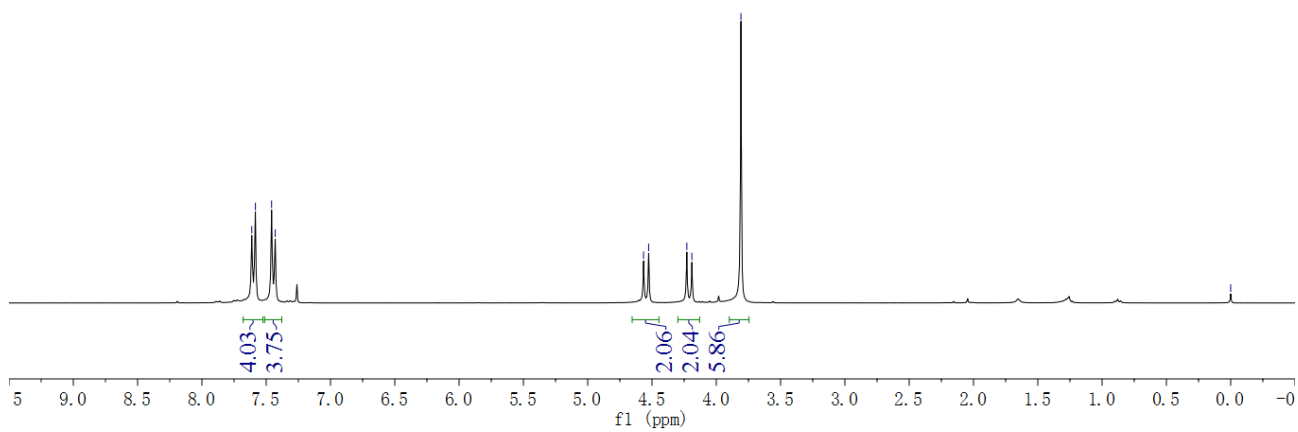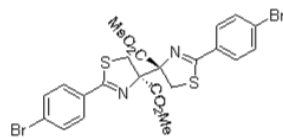

2j

$^{13}\text{C NMR}$  (75 MHz,  $\text{CDCl}_3$ )

171.51  
170.59

131.61  
131.54  
130.03  
126.23

-94.61

77.48  
77.05  
76.63

-53.20

-39.04

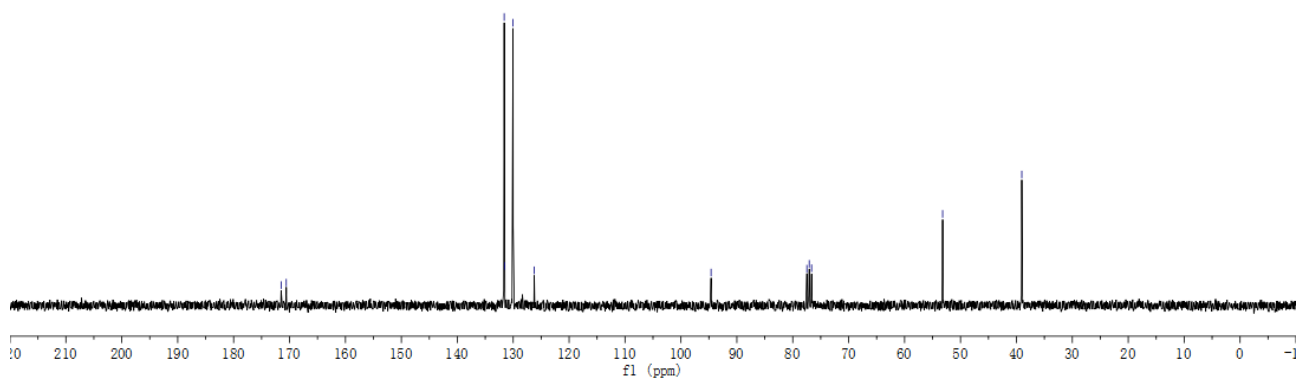

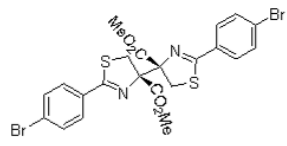

2j'

<sup>1</sup>H NMR (300 MHz, CDCl<sub>3</sub>)

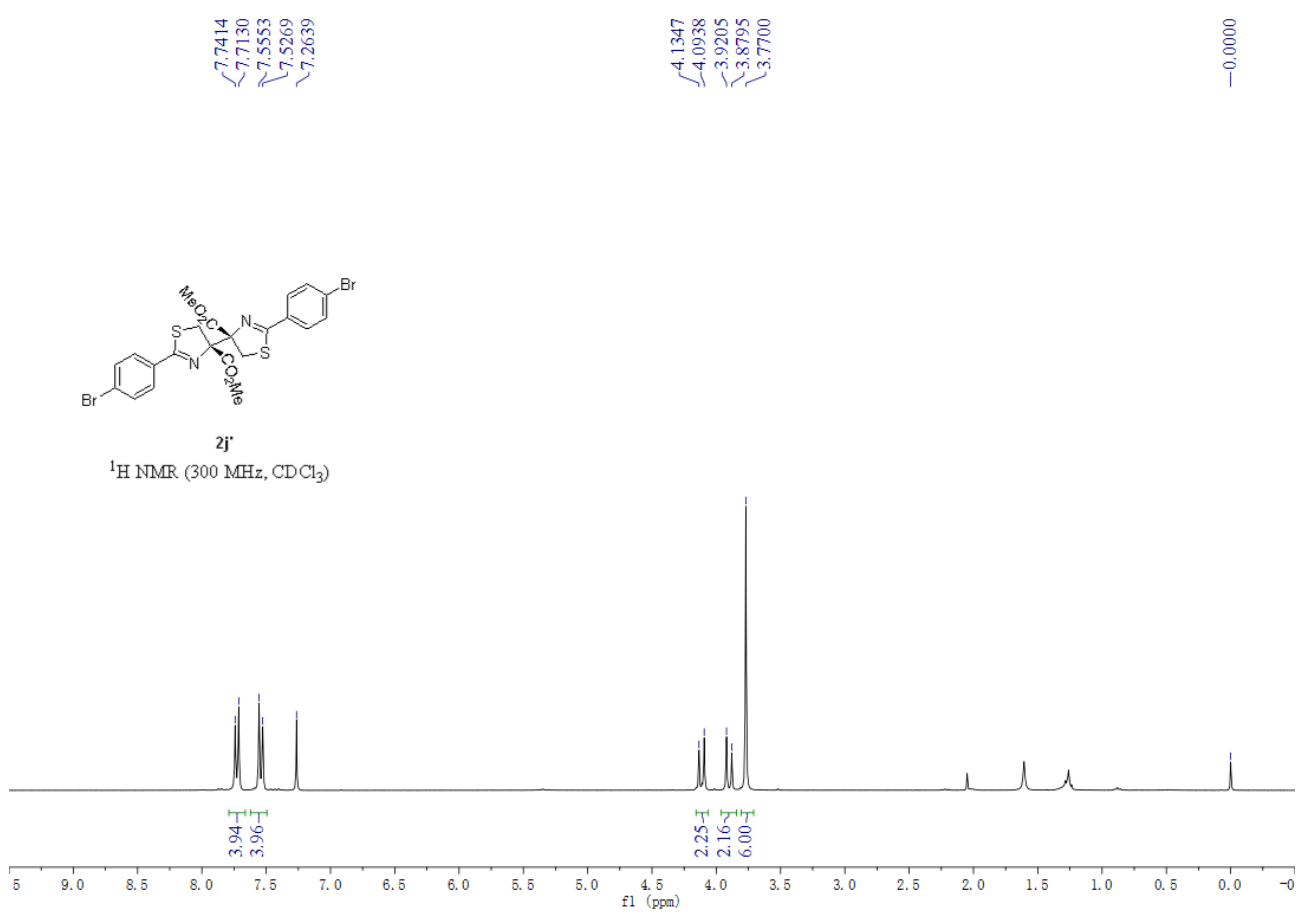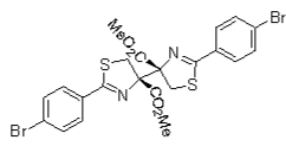

2j'

<sup>13</sup>C NMR (75 MHz, CDCl<sub>3</sub>)

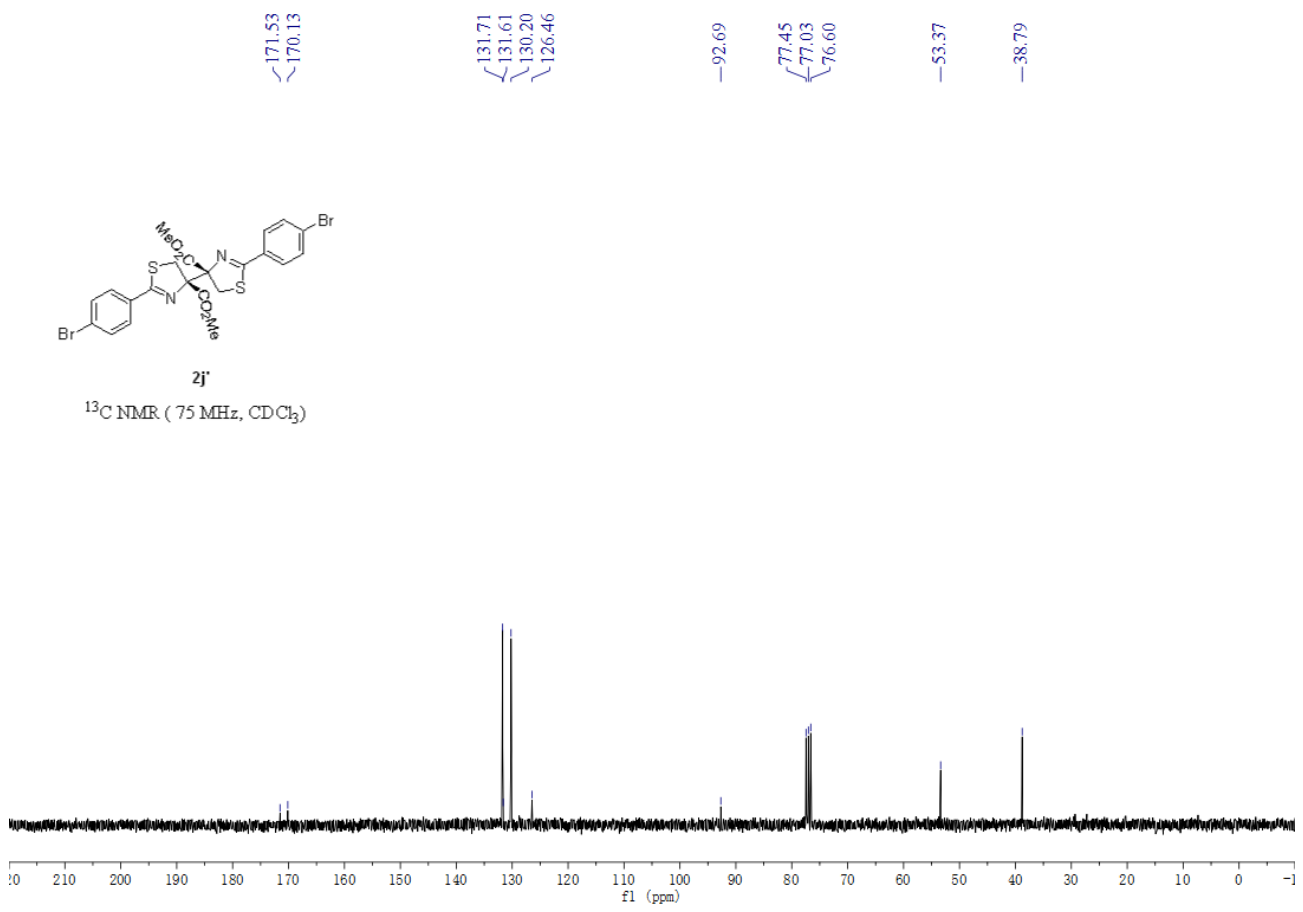

7.6732  
7.6665  
7.6515  
7.6452  
7.6366  
7.4711  
7.4601  
7.4536  
7.4379  
7.4319  
7.2608

4.5546  
4.5154  
4.2199  
4.1807  
3.8043

0.0000

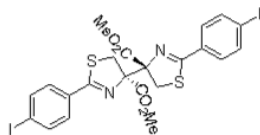

2k

<sup>1</sup>H NMR (300 MHz, CDCl<sub>3</sub>)

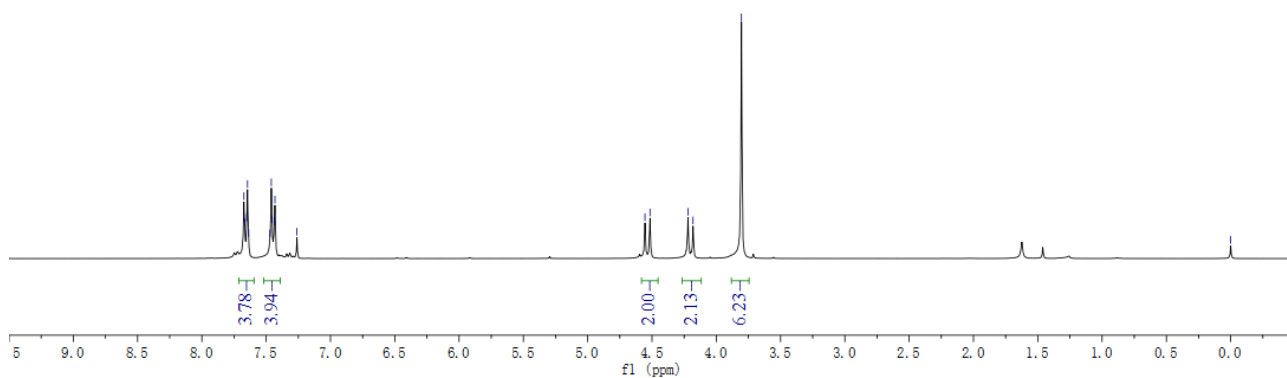

171.74  
170.58

137.58  
132.08  
130.04

98.63  
94.59

77.48  
77.06  
76.63

53.21

39.00

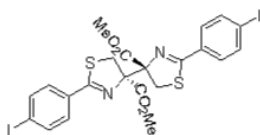

2k

<sup>13</sup>C NMR (75 MHz, CDCl<sub>3</sub>)

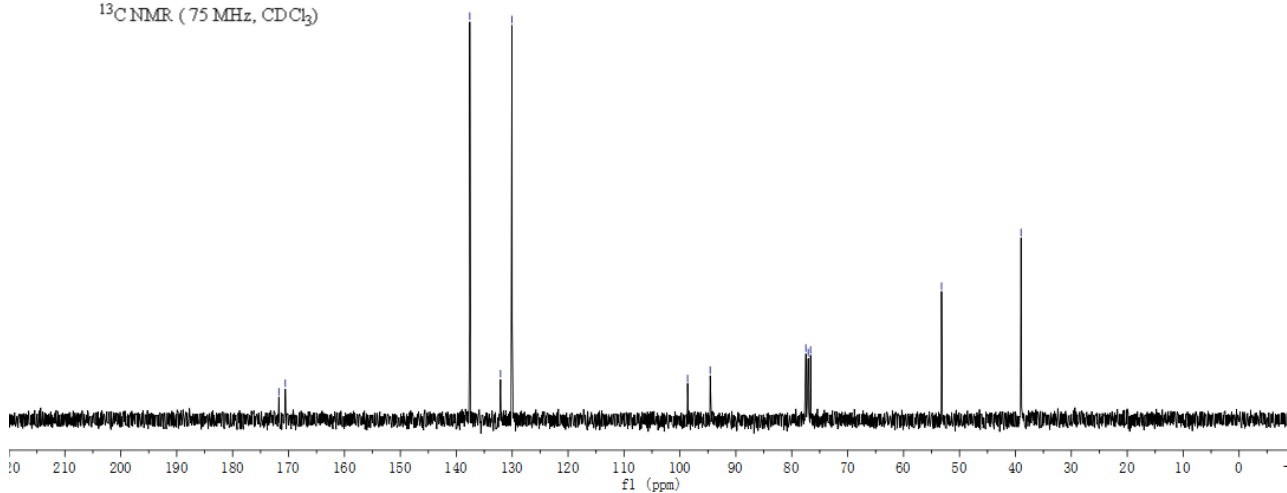

7.9217  
7.9157  
7.5626  
7.5565  
7.5363  
7.5302  
7.1576  
7.1312

4.5650  
4.5260  
4.2192  
4.1800  
3.8052

2.3398

0.0000

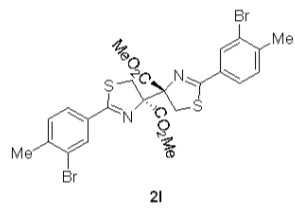

<sup>1</sup>H NMR (300 MHz, CDCl<sub>3</sub>)

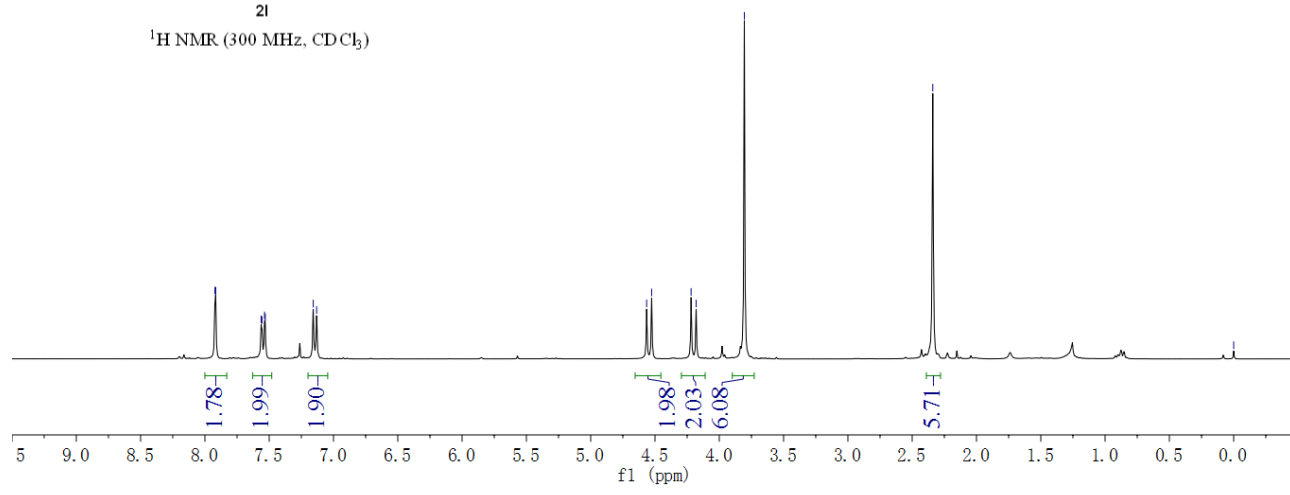

170.47  
170.19

141.14  
131.60  
131.53  
130.09  
126.96  
124.30

93.98

77.01  
76.58  
76.16

52.66

38.45

22.53

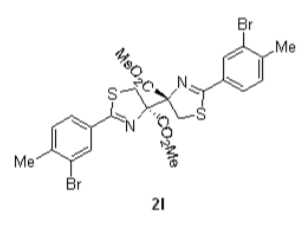

<sup>13</sup>C NMR (75 MHz, CDCl<sub>3</sub>)

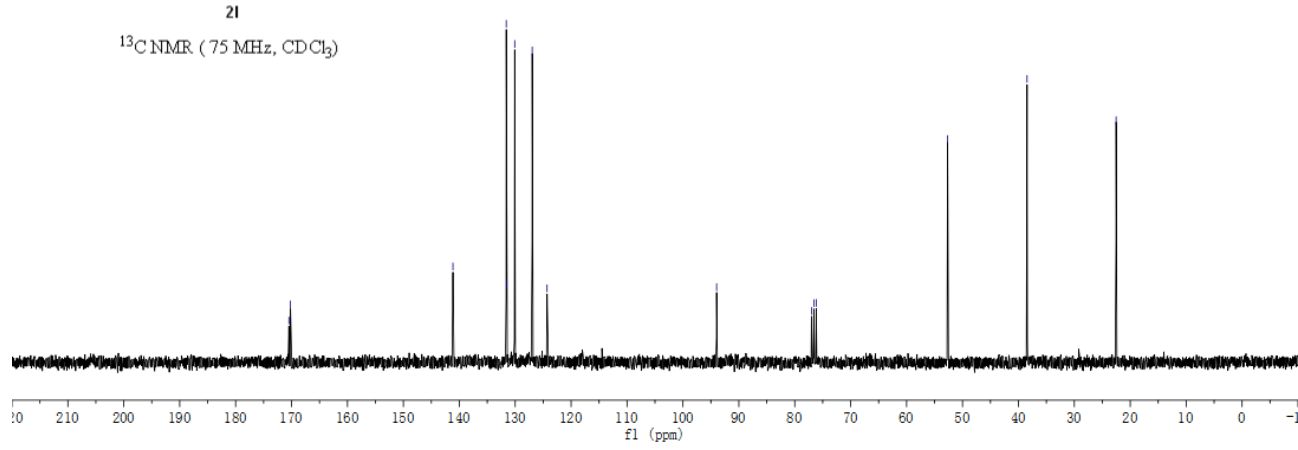

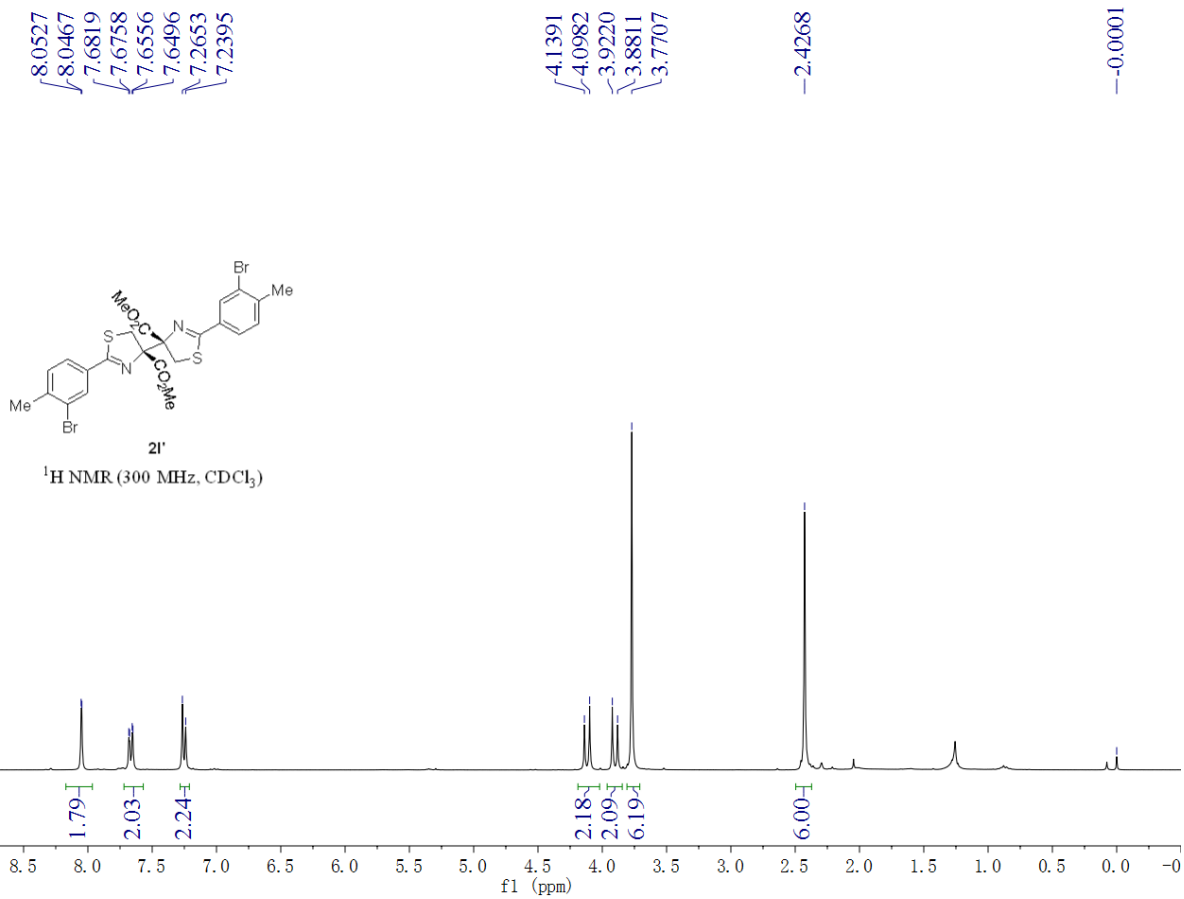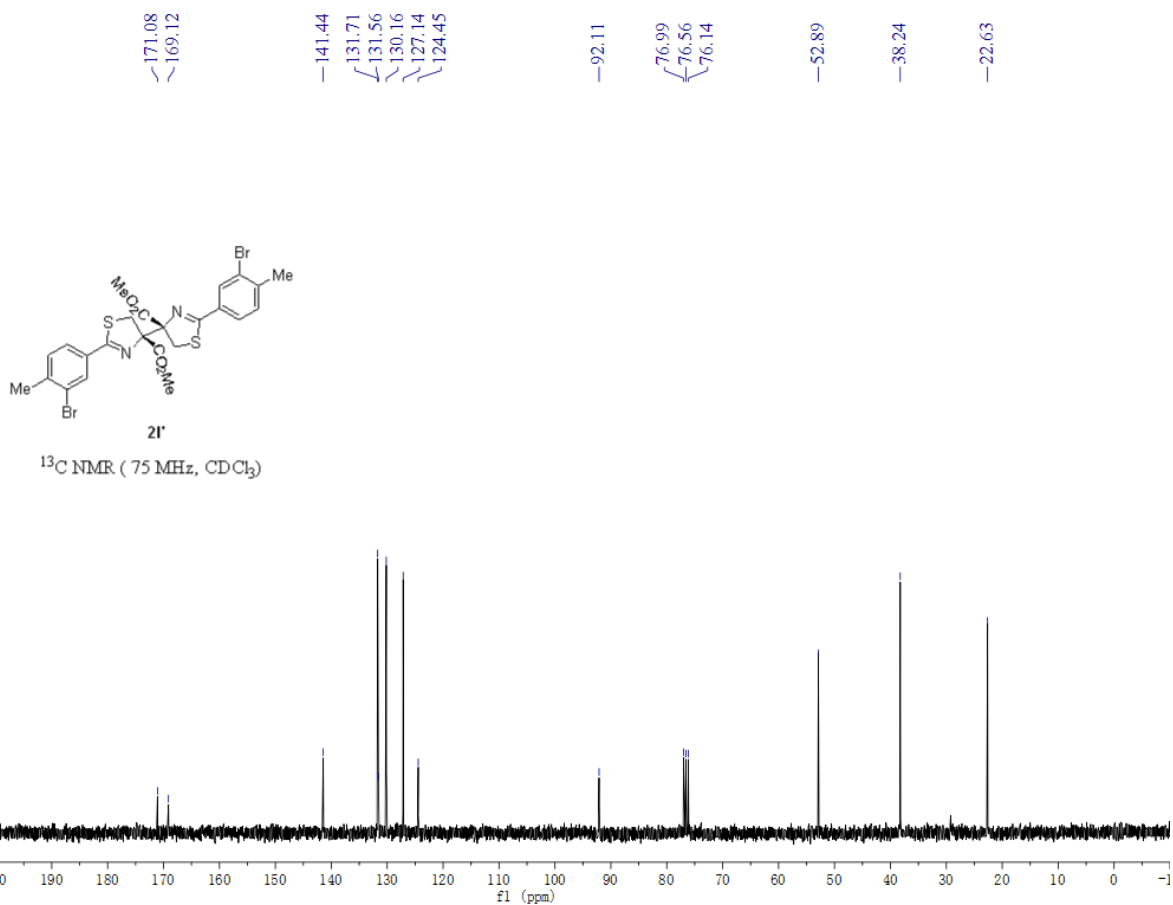

7.6128  
7.6054  
7.5829  
7.5676  
7.5571  
7.5484  
7.5399  
7.5323  
6.9538  
6.9241  
6.8948

4.5670  
4.5279  
4.2203  
4.1812  
3.8051

2.2272  
2.2200

0.0846  
0.0000

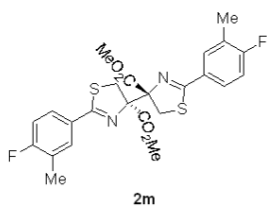

<sup>1</sup>H NMR (300 MHz, CDCl<sub>3</sub>)

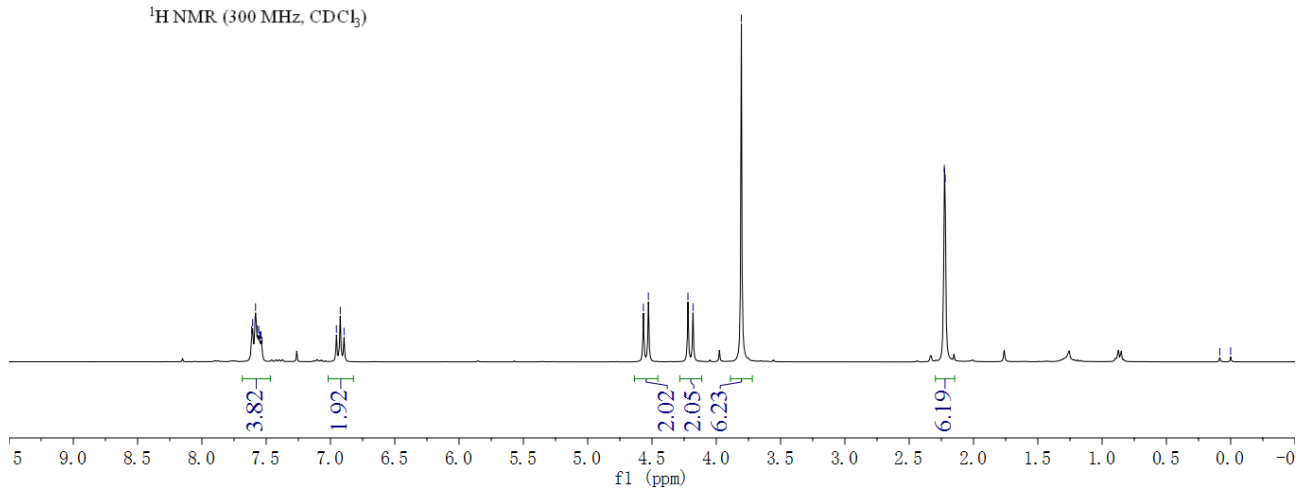

170.87  
170.34  
164.45  
161.12

131.46  
131.38  
128.21  
127.64  
127.53  
124.68  
124.44  
114.68  
114.38

94.05

77.01  
76.59  
76.16

52.63

38.51

13.97  
13.92

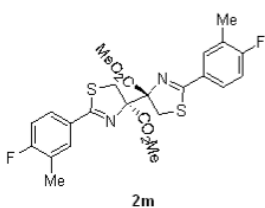

<sup>13</sup>C NMR (75 MHz, CDCl<sub>3</sub>)

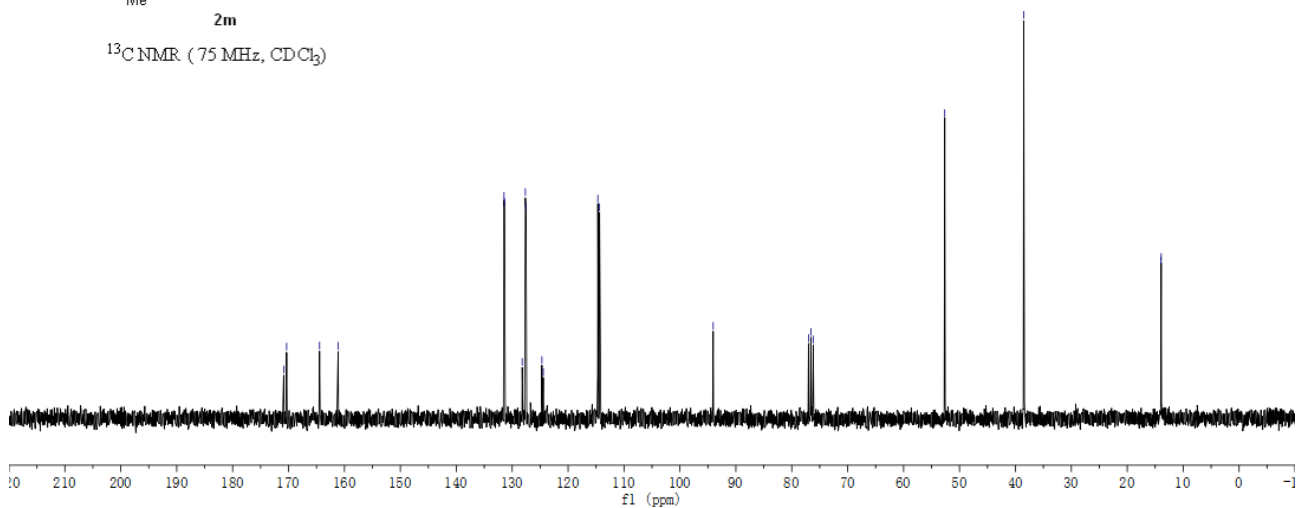

7.7607  
7.7530  
7.7360  
7.7285  
7.6834  
7.6758  
7.6672  
7.6568  
7.6472  
7.6383  
7.6307  
7.2660  
7.0481  
7.0185  
6.9889

4.1403  
4.0996  
3.9141  
3.8733  
3.7754

2.2979  
2.2910

-0.0000

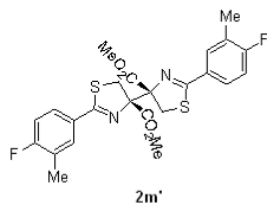

<sup>1</sup>H NMR (300 MHz, CDCl<sub>3</sub>)

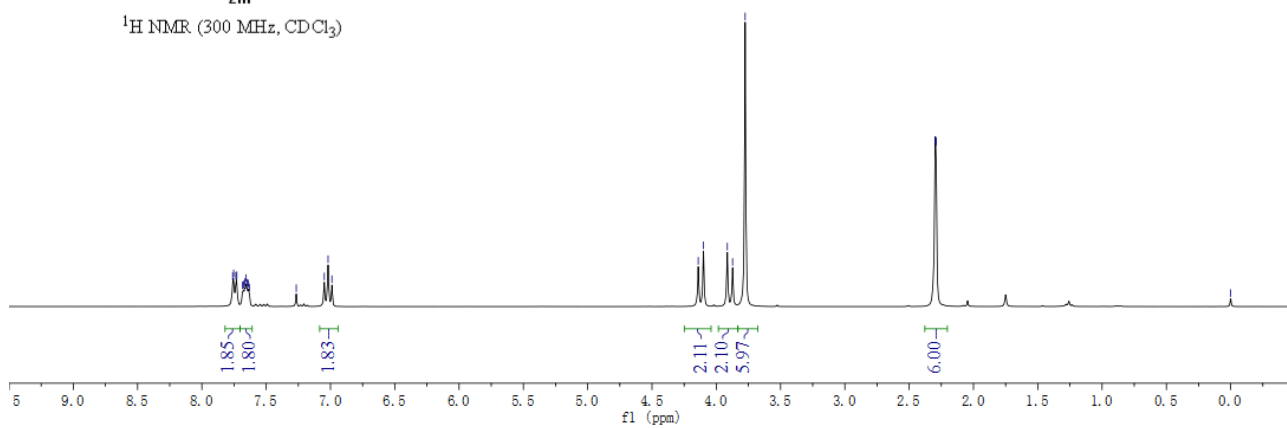

171.27  
169.55  
164.68  
161.35

131.55  
131.47  
128.17  
127.90  
127.78  
124.87  
124.63  
114.77  
114.47

92.17

77.00  
76.57  
76.15

52.87

38.30

13.99  
13.94

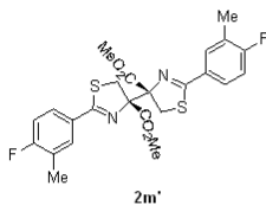

<sup>13</sup>C NMR (75 MHz, CDCl<sub>3</sub>)

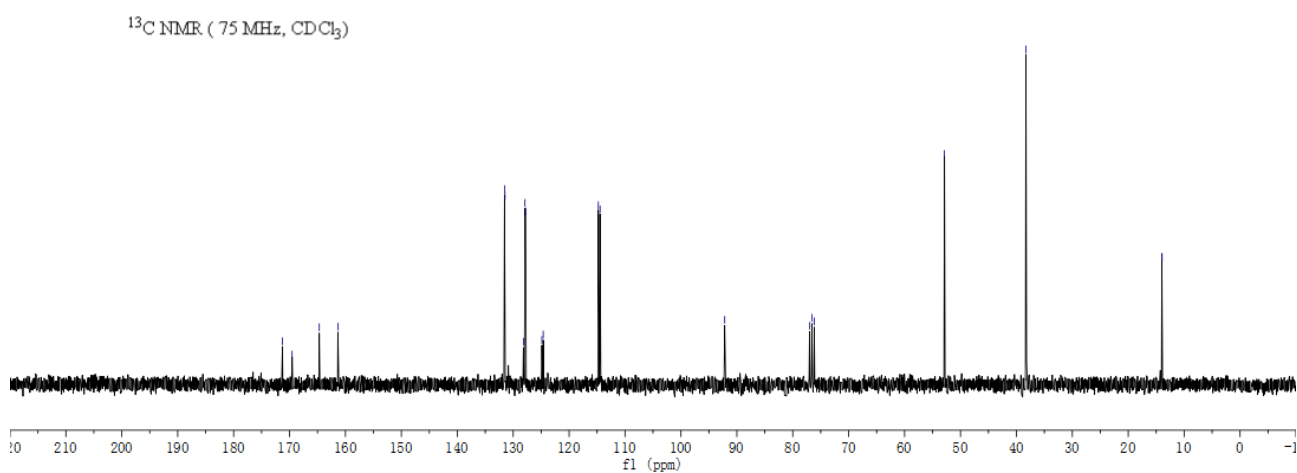



7.7666  
7.7623  
7.7570  
7.7466  
7.7393  
7.7335  
7.3833  
7.3648  
7.3599  
7.3549  
7.3304  
7.3113  
7.3050  
7.2825  
7.2771  
7.2542

4.6230  
4.5843  
4.2913  
4.2724  
4.2679  
4.2539  
4.2486  
4.2440  
4.2246  
4.2209  
4.2148

1.3222  
1.2985  
1.2748

-0.0002

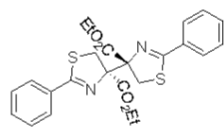

2n

$^1\text{H NMR}$  (300 MHz,  $\text{CDCl}_3$ )

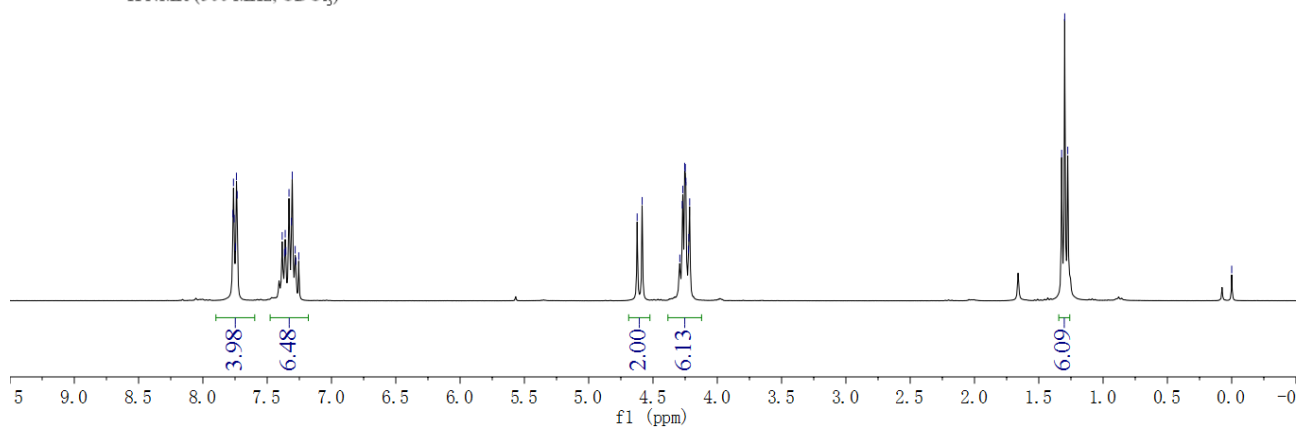

171.73  
169.82

132.44  
130.86  
128.09  
127.81

94.17

76.98  
76.56  
76.13

61.64

38.46

13.56

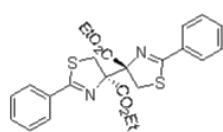

2n

$^{13}\text{C NMR}$  (75 MHz,  $\text{CDCl}_3$ )

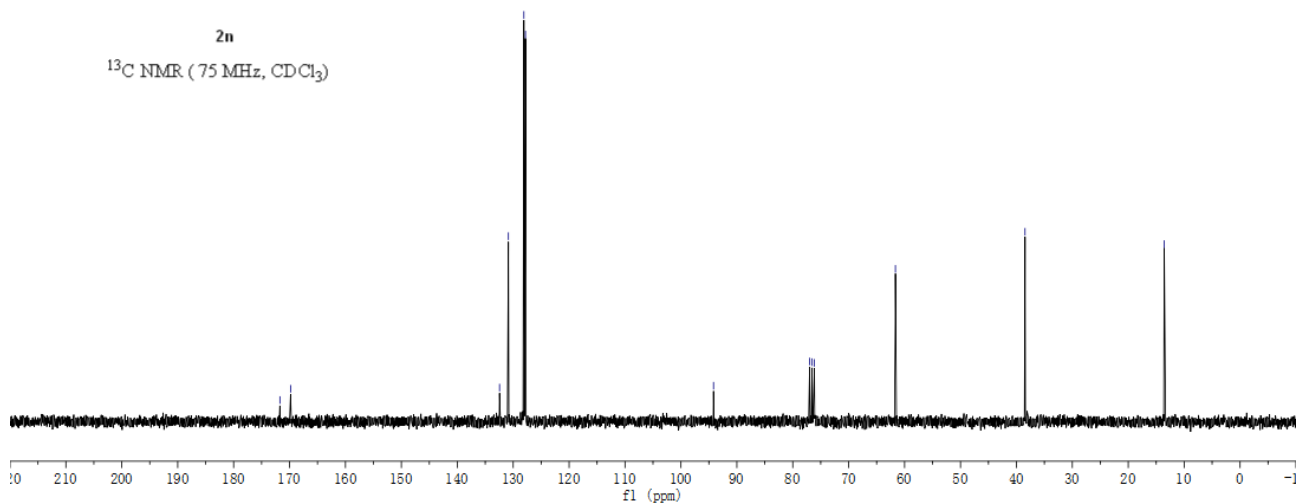

7.8894  
7.8852  
7.8801  
7.8624  
7.8566  
7.4908  
7.4816  
7.4710  
7.4626  
7.4522  
7.4472  
7.4422  
7.4182  
7.3989  
7.3929  
7.3757  
7.3698  
7.3645  
7.2536

4.2379  
4.2183  
4.2142  
4.1904  
4.1772  
4.1667  
4.0132  
3.9724

1.2297  
1.2060  
1.1822

-0.0001

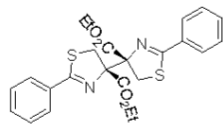

2n'

<sup>1</sup>H NMR (300 MHz, CDCl<sub>3</sub>)

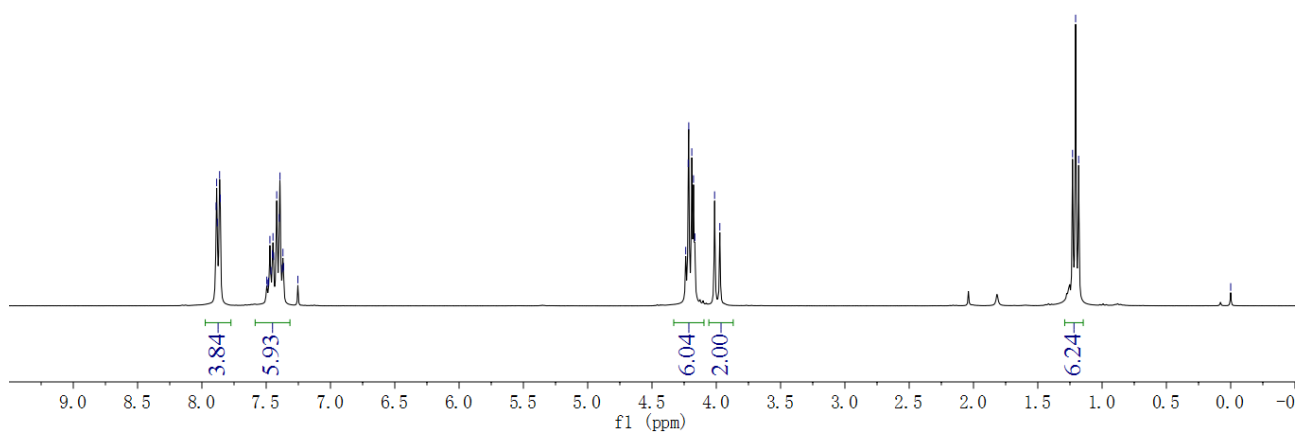

170.29  
170.17

132.44  
131.14  
128.26  
127.93

92.32

77.02  
76.60  
76.17

61.79

38.05

13.50

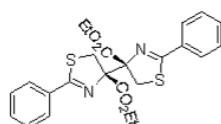

2n'

<sup>13</sup>C NMR (75 MHz, CDCl<sub>3</sub>)

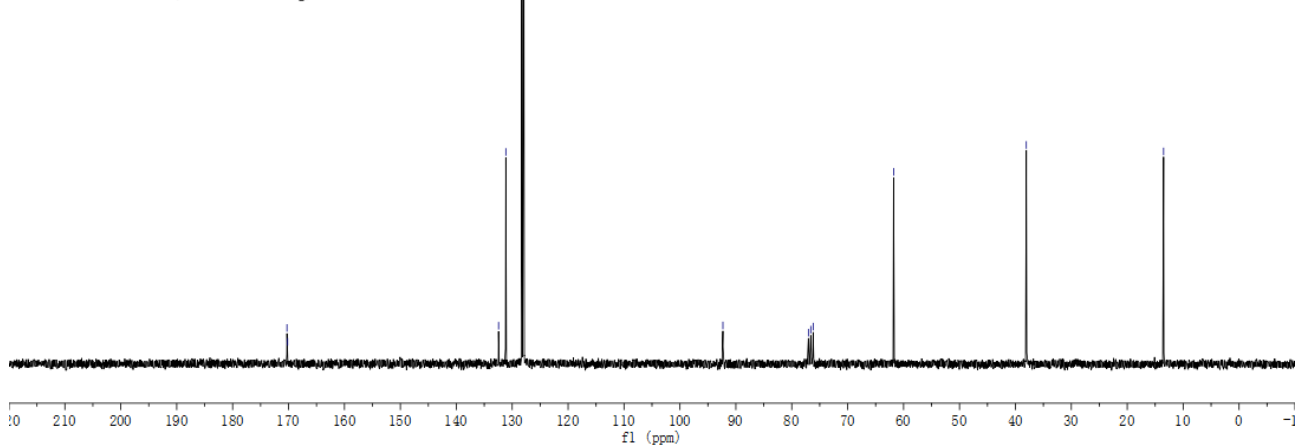

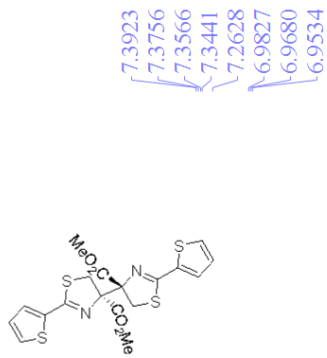

**2o**

<sup>1</sup>H NMR (300 MHz, CDCl<sub>3</sub>)

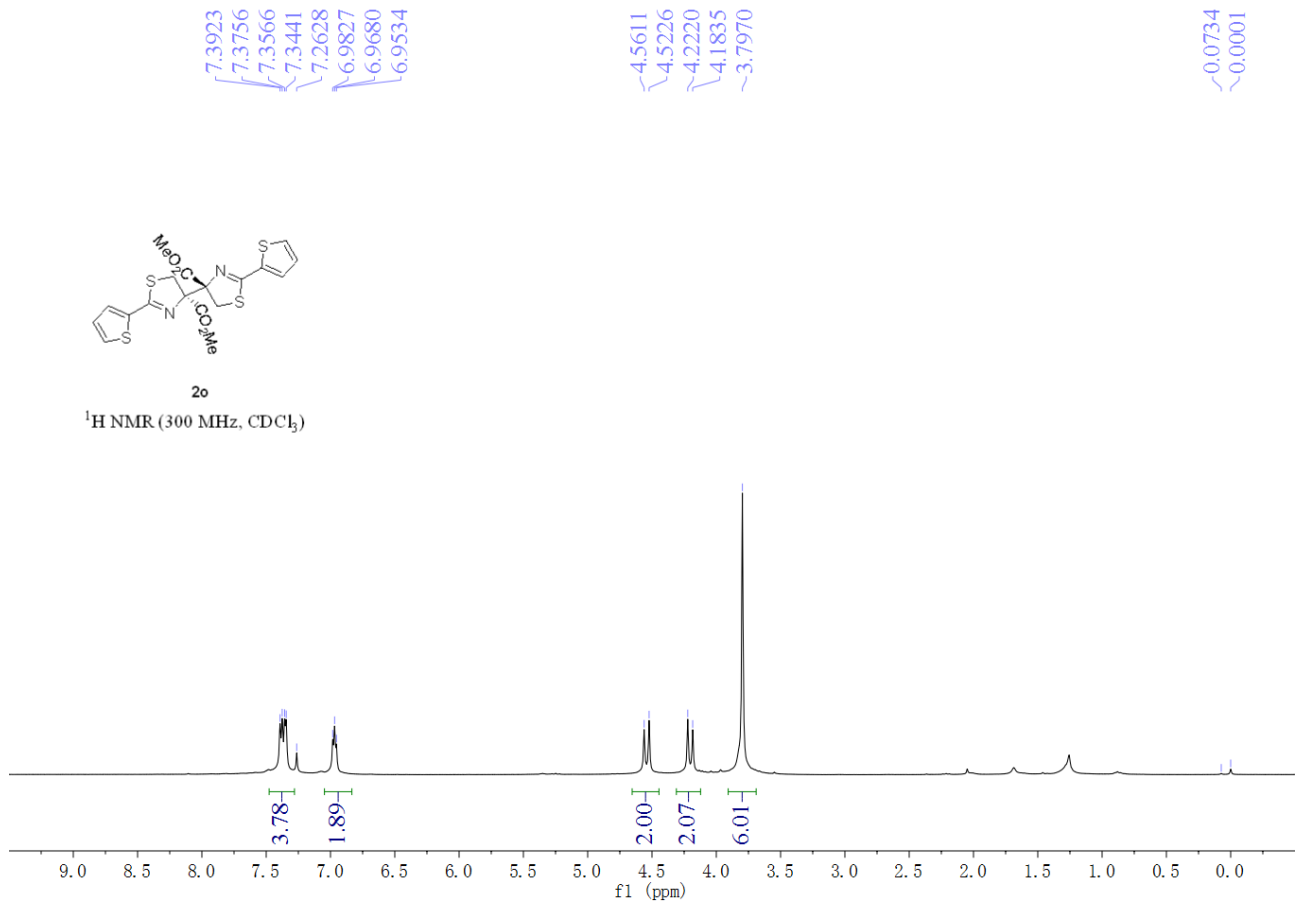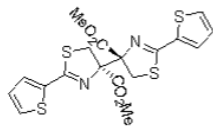

**2o**

<sup>13</sup>C NMR (75 MHz, CDCl<sub>3</sub>)

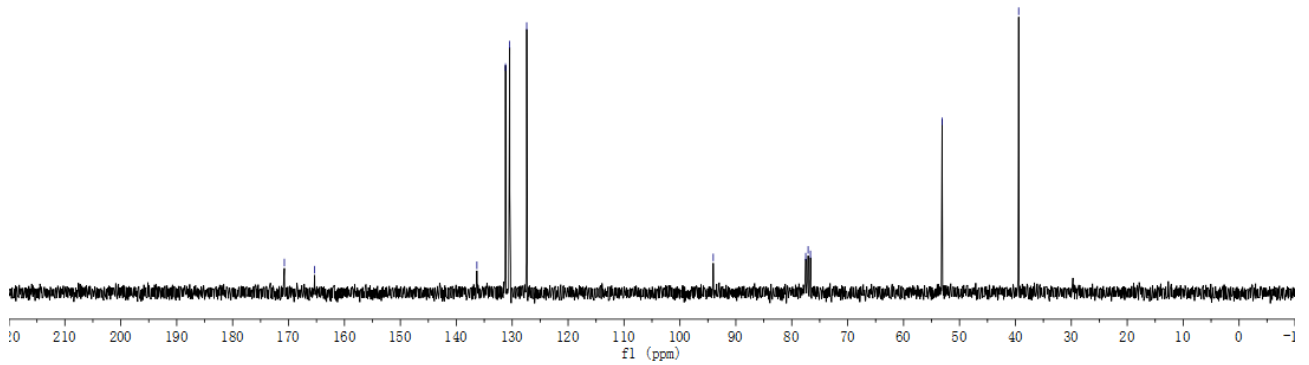

8.0045  
7.9794  
7.5313  
7.5059  
7.4813  
7.4248  
7.3995  
7.3743  
7.2655

4.8682  
4.8348  
4.6762  
4.6428

3.7820

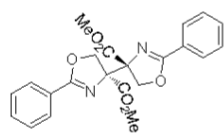

2r

<sup>1</sup>H NMR (300 MHz, CDCl<sub>3</sub>)

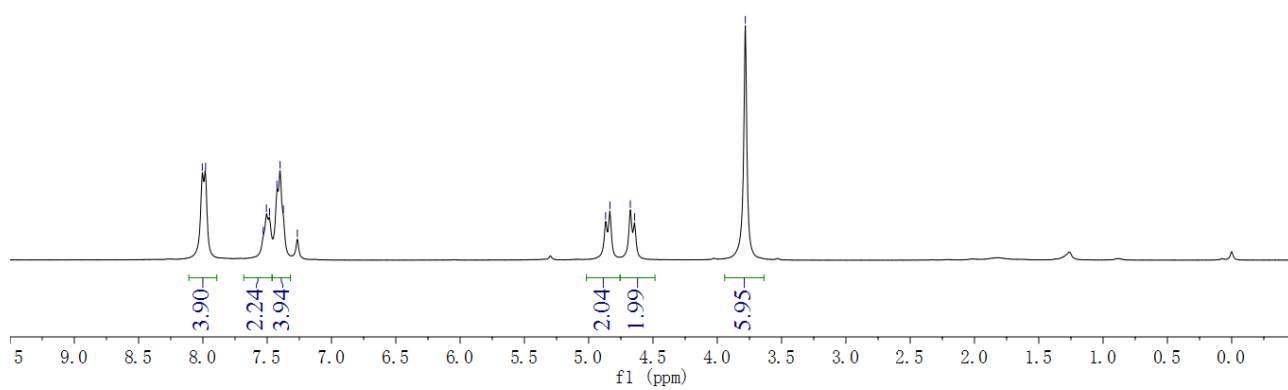

171.87  
167.06

132.05  
128.94  
128.28  
126.71

82.34  
77.47  
77.05  
76.62  
72.50

53.17

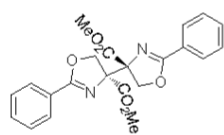

2r

<sup>1</sup>H NMR (300 MHz, CDCl<sub>3</sub>)

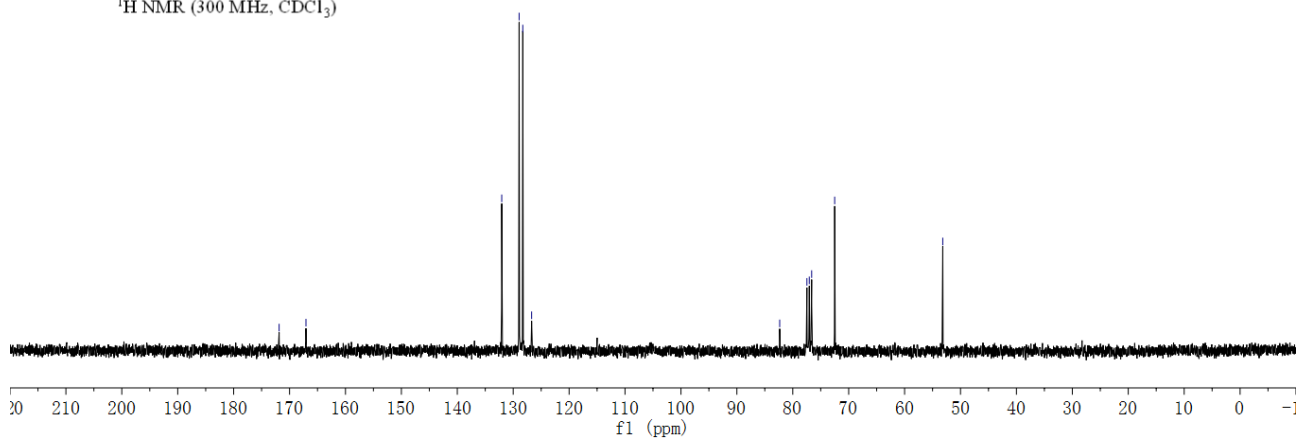

7.6980  
7.6687  
6.9561  
6.9340  
6.9258  
6.8788  
6.8483  
6.8384  
6.8093

4.5583  
4.5194  
4.1990  
4.1600  
3.7848  
3.7787

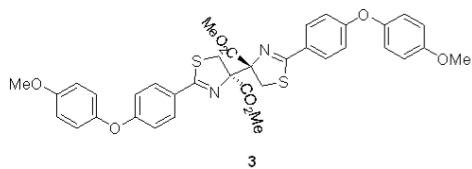

<sup>1</sup>H NMR (300 MHz, CDCl<sub>3</sub>)

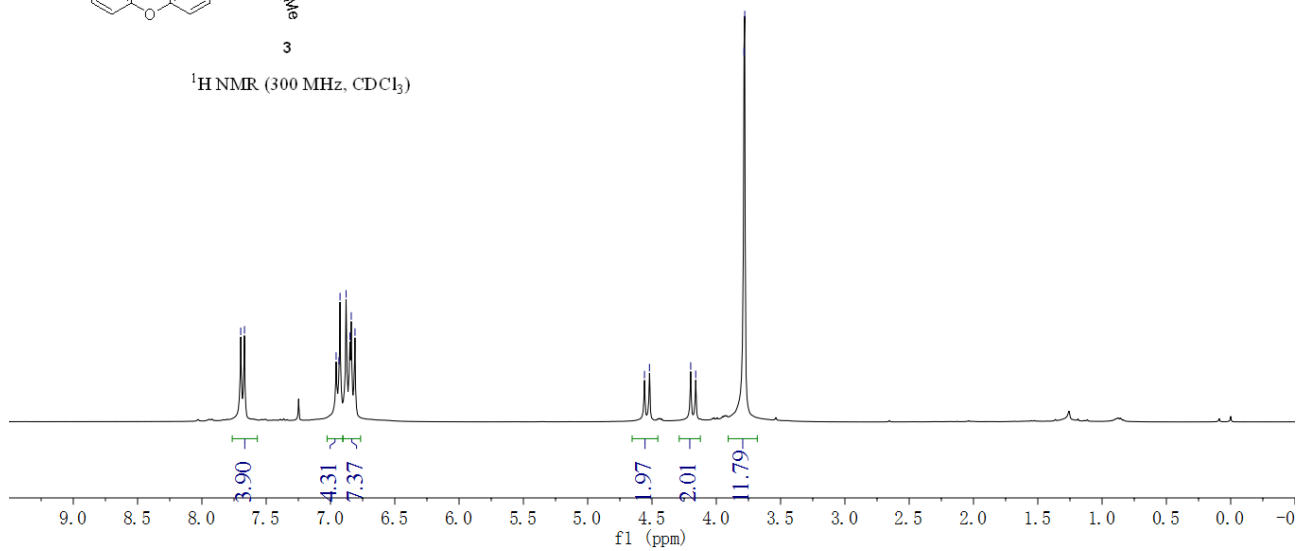

171.41  
171.02  
161.47  
156.42  
148.86

130.41  
126.96  
121.42  
116.59  
114.97

94.56

77.55  
77.13  
76.70

55.63  
53.08

38.97

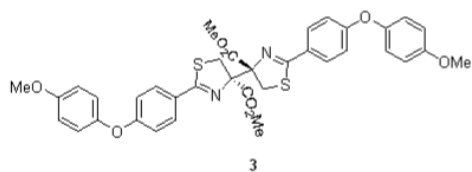

<sup>13</sup>C NMR (75 MHz, CDCl<sub>3</sub>)

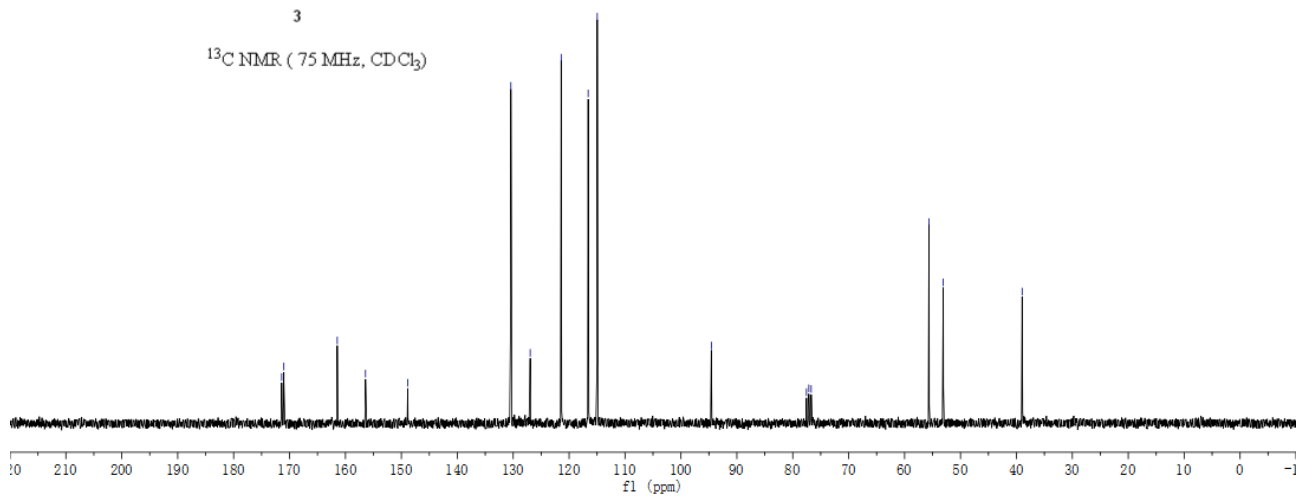

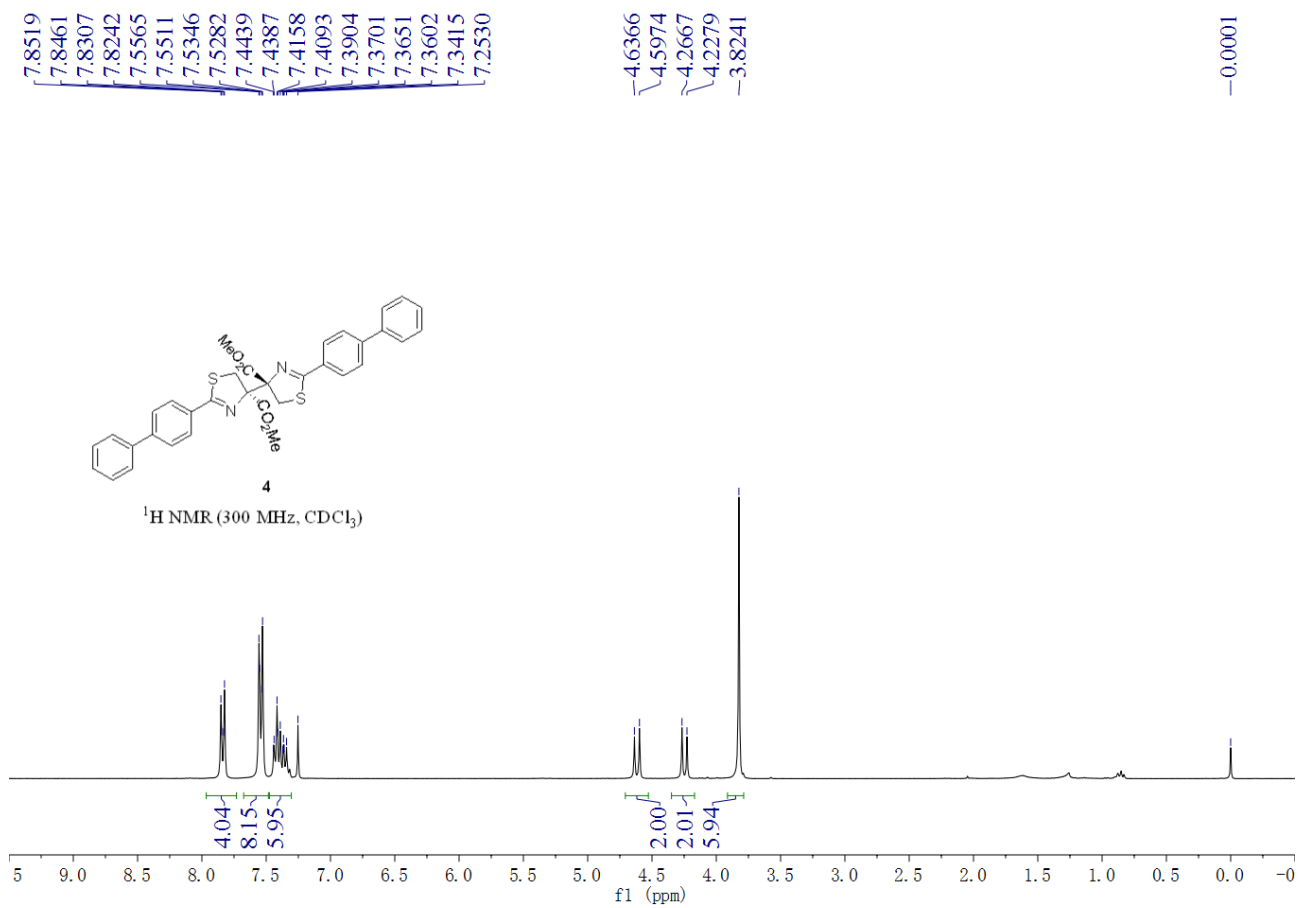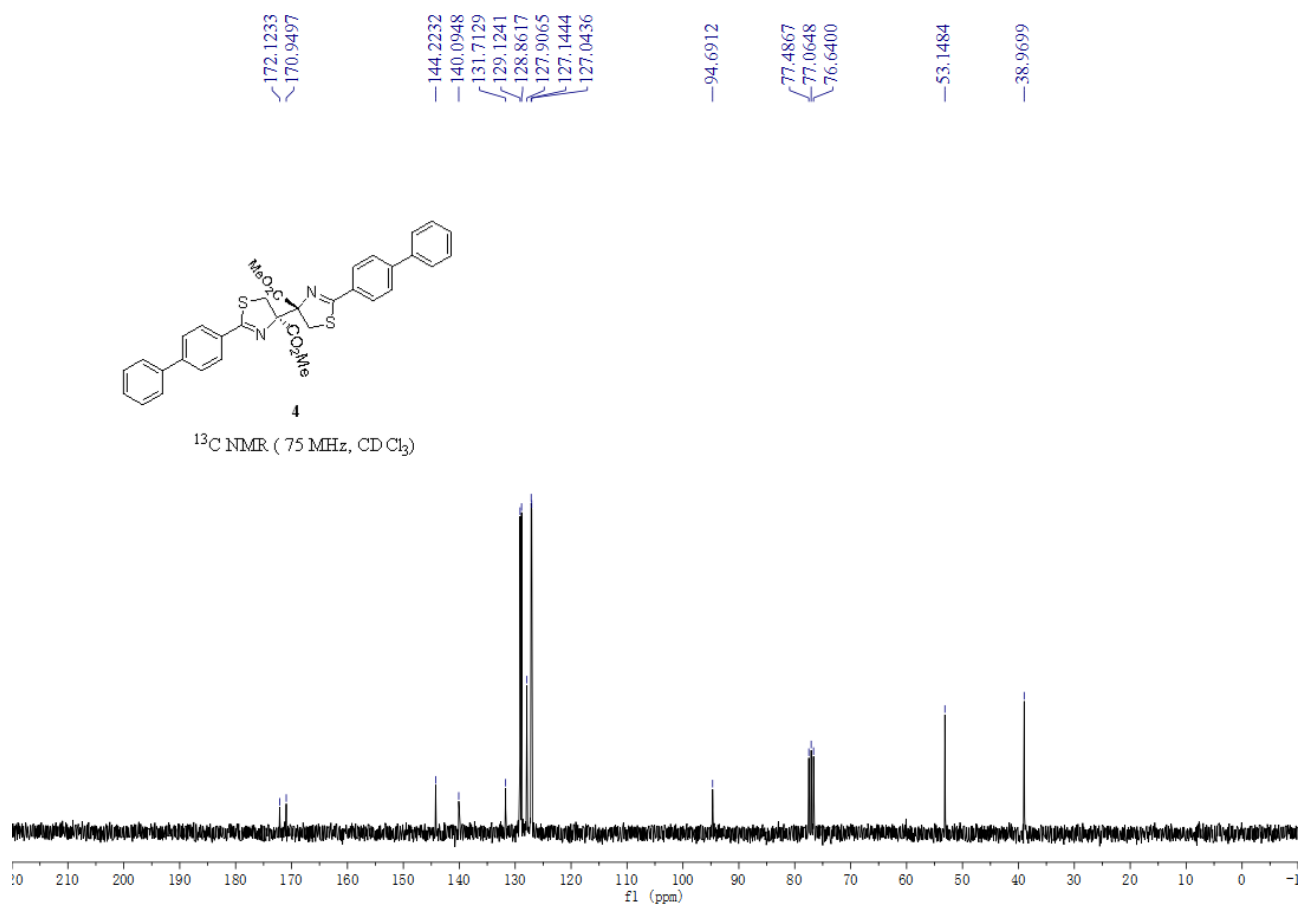

7.9828  
7.9726  
7.9572  
7.9504  
7.8339  
7.4293  
7.4150  
7.3985  
7.3811  
7.3750  
7.3633  
7.1755

-0.0002  
-0.0760

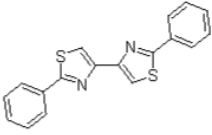

5a

$^1\text{H NMR}$  (300 MHz,  $\text{CDCl}_3$ )

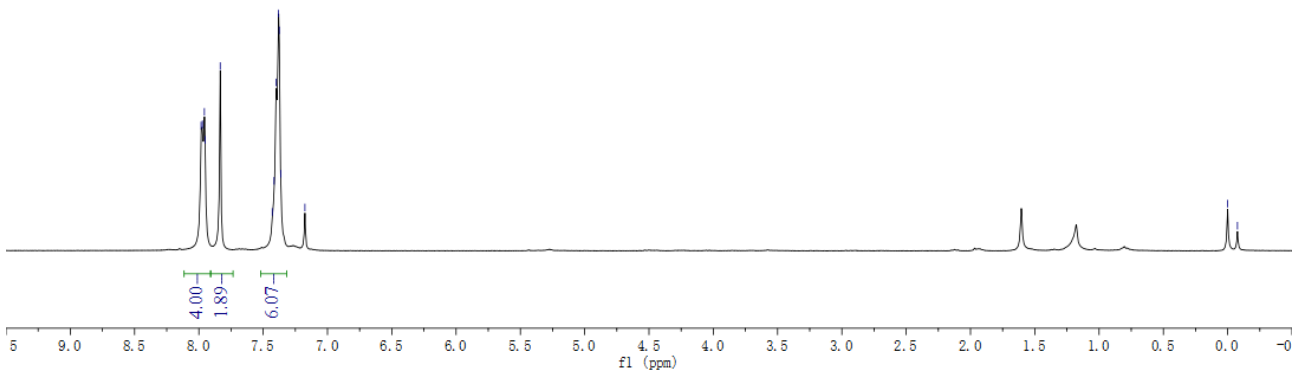

-168.33

-151.57

-133.57

-130.17

-128.96

-126.04

-115.34

77.46

77.04

76.61

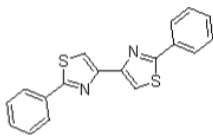

5a

$^{13}\text{C NMR}$  (75 MHz,  $\text{CDCl}_3$ )

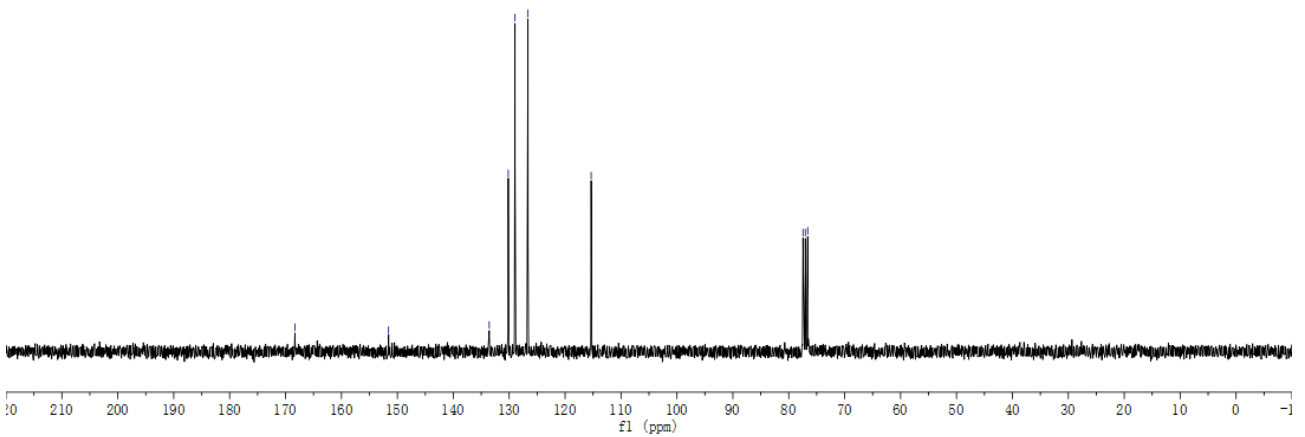

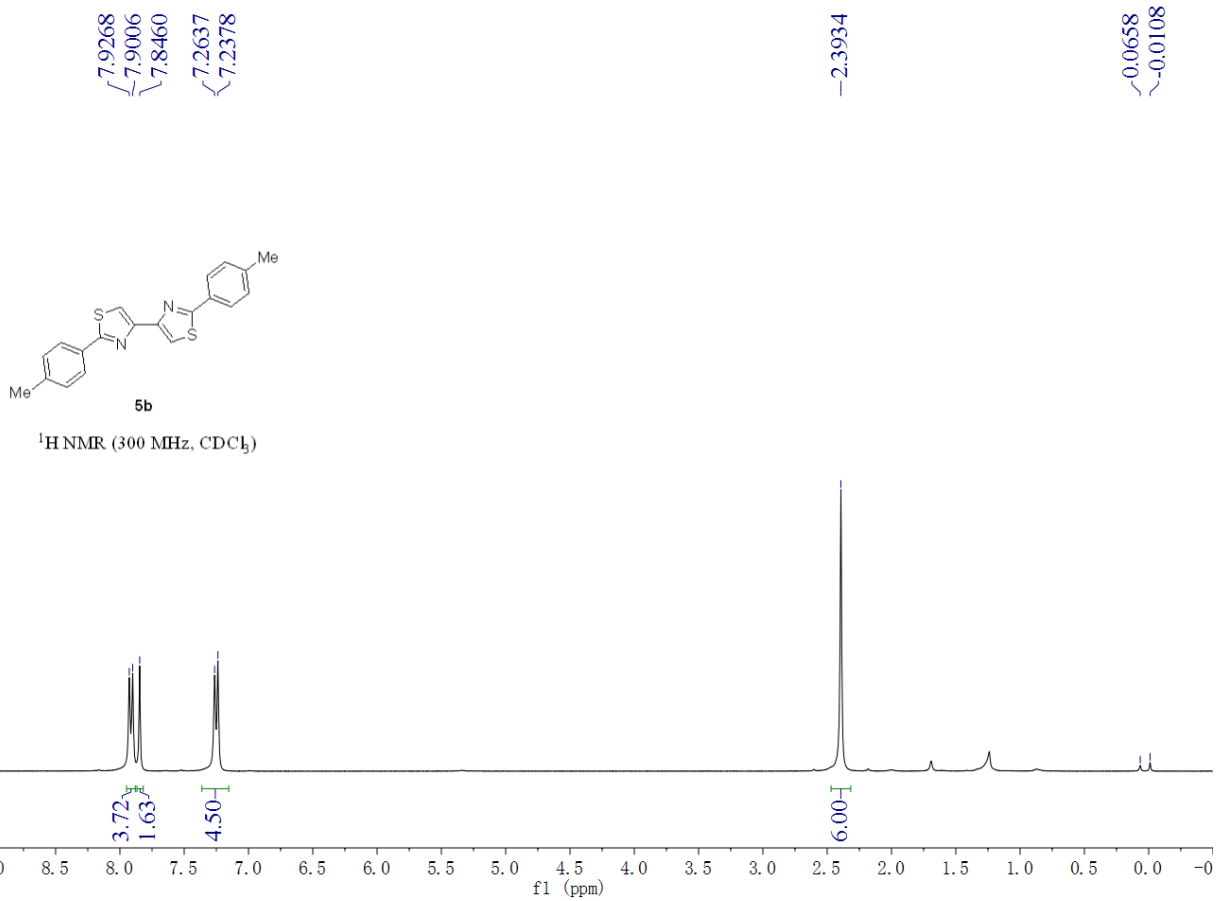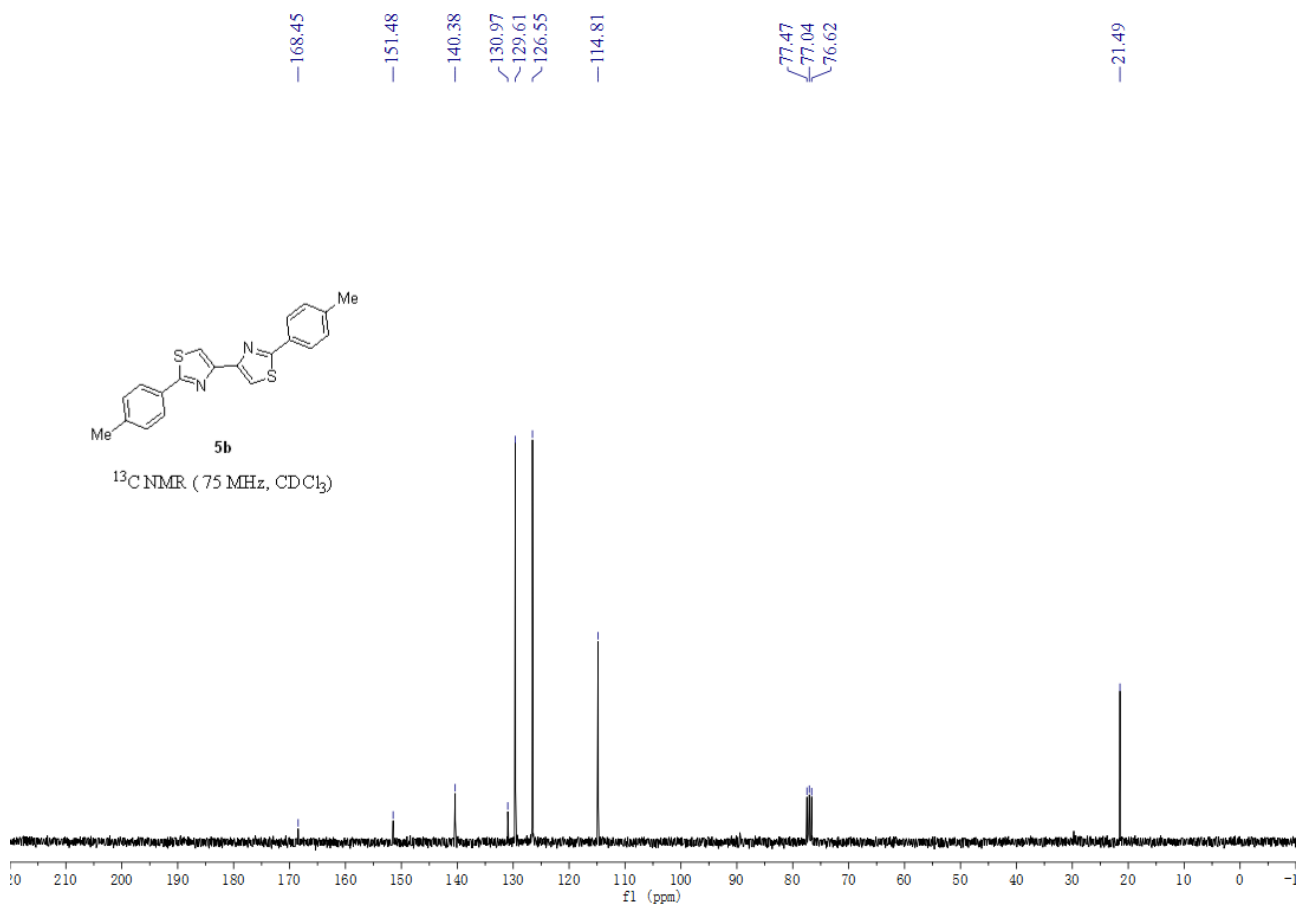



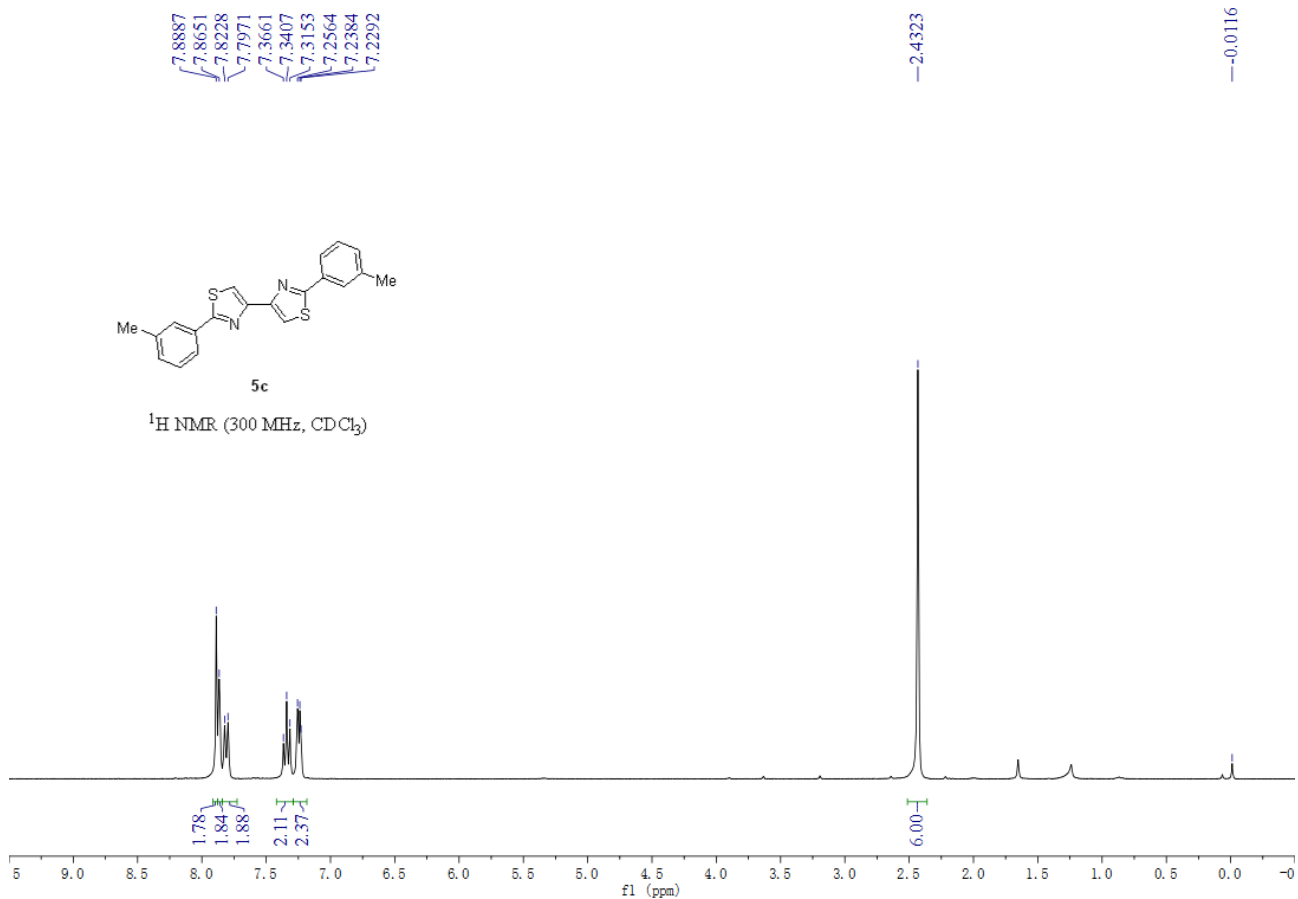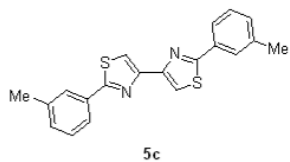

<sup>1</sup>H NMR (300 MHz, CDCl<sub>3</sub>)

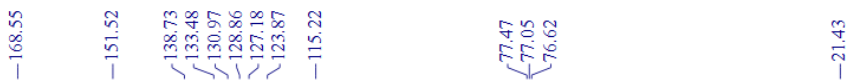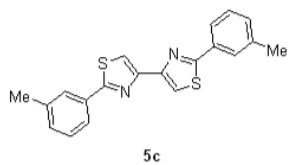

<sup>13</sup>C NMR (75 MHz, CDCl<sub>3</sub>)

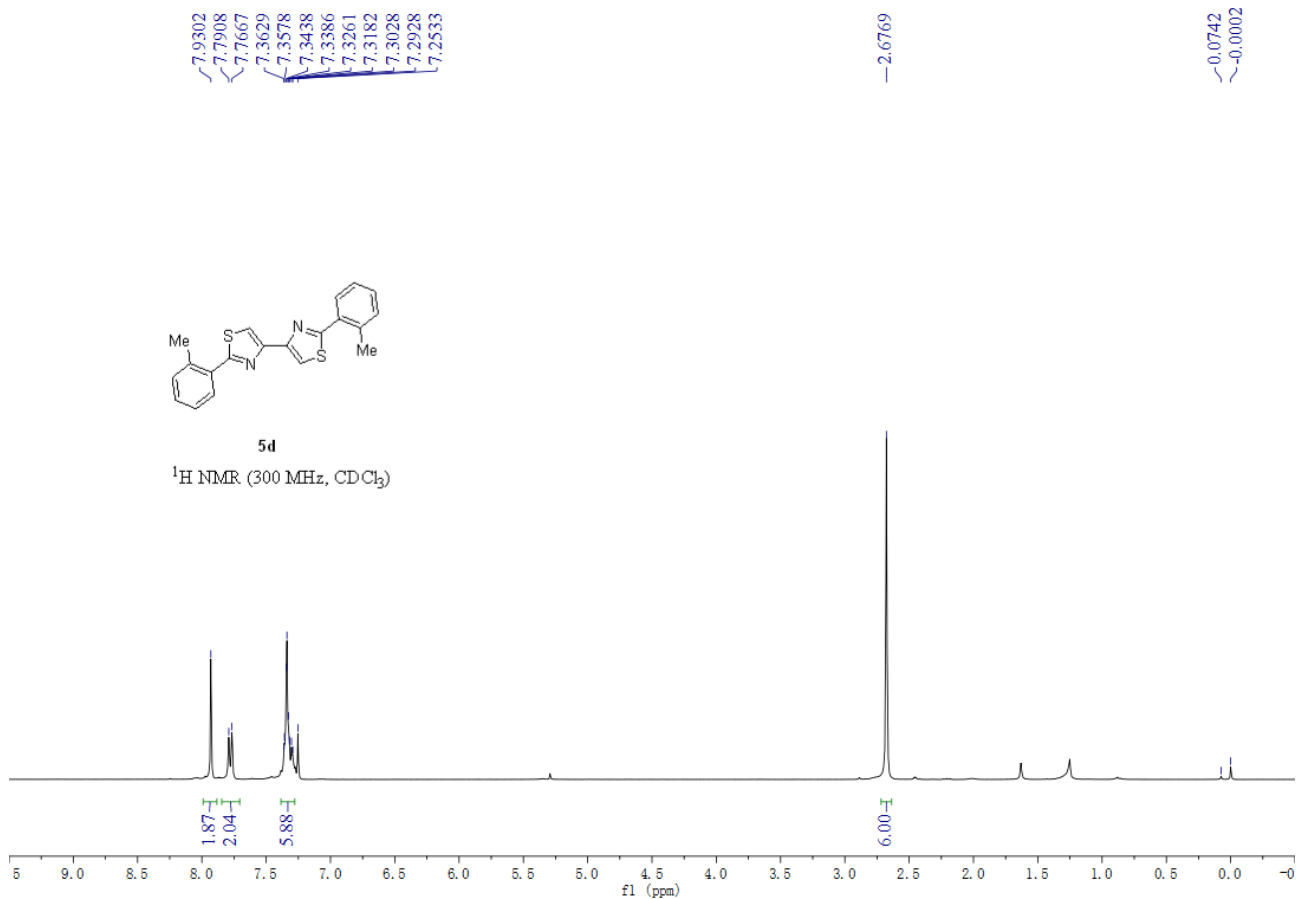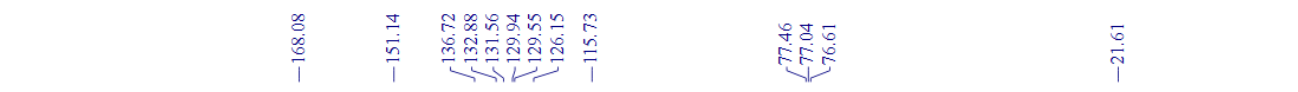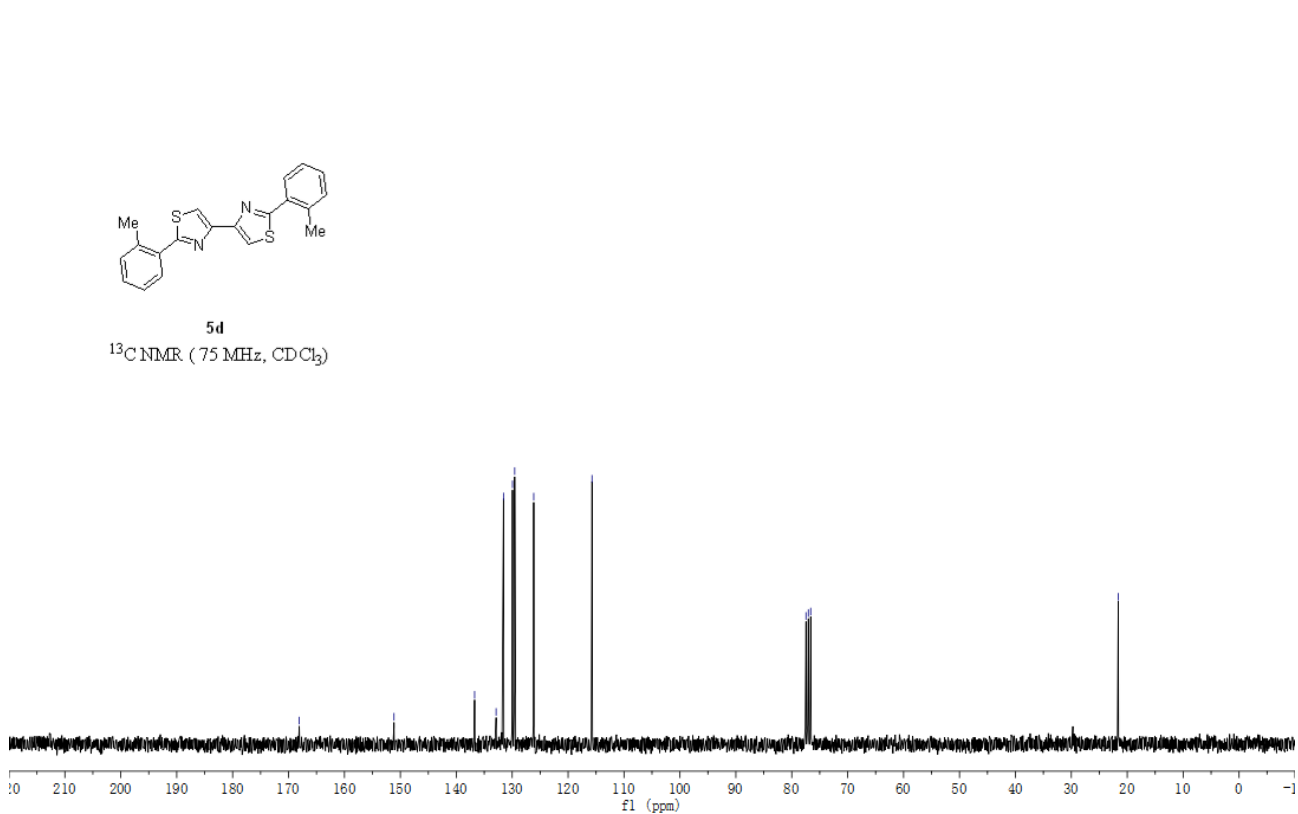

7.9090  
7.8852  
7.8698  
7.8266  
7.8015  
7.2652  
7.1251  
7.0956  
7.0661

-2.3749

-0.0076

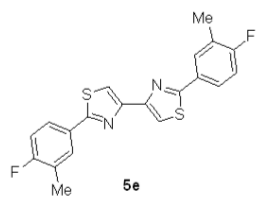

<sup>1</sup>H NMR (300 MHz, CDCl<sub>3</sub>)

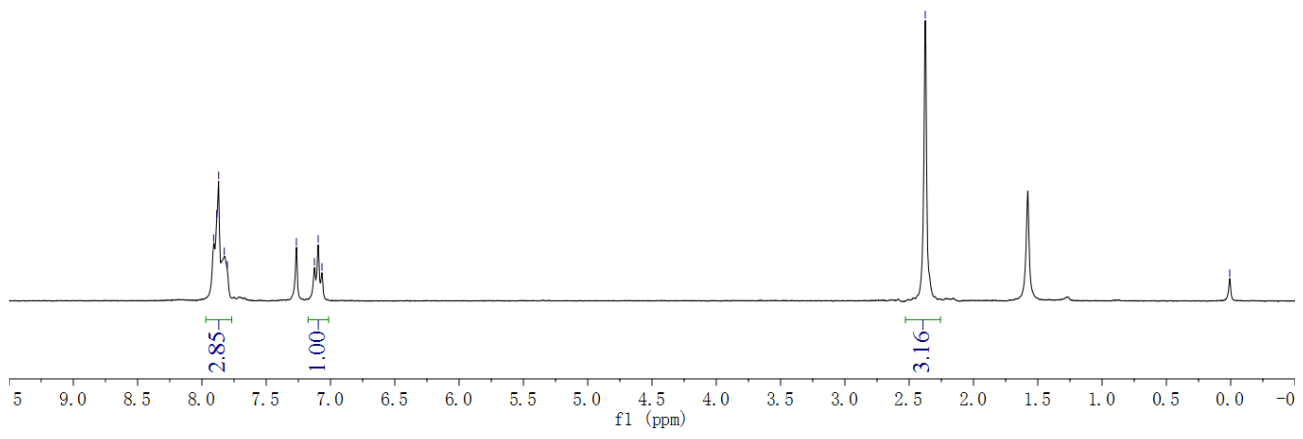

~164.2272  
~160.9243  
-151.4463  
129.8531  
129.7781  
125.9480  
125.8342  
125.5659  
115.7585  
115.4527  
115.1368  
77.4241  
77.0015  
76.5791  
-14.5472

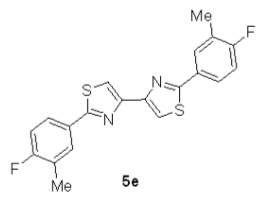

<sup>13</sup>C NMR (75 MHz, CDCl<sub>3</sub>)

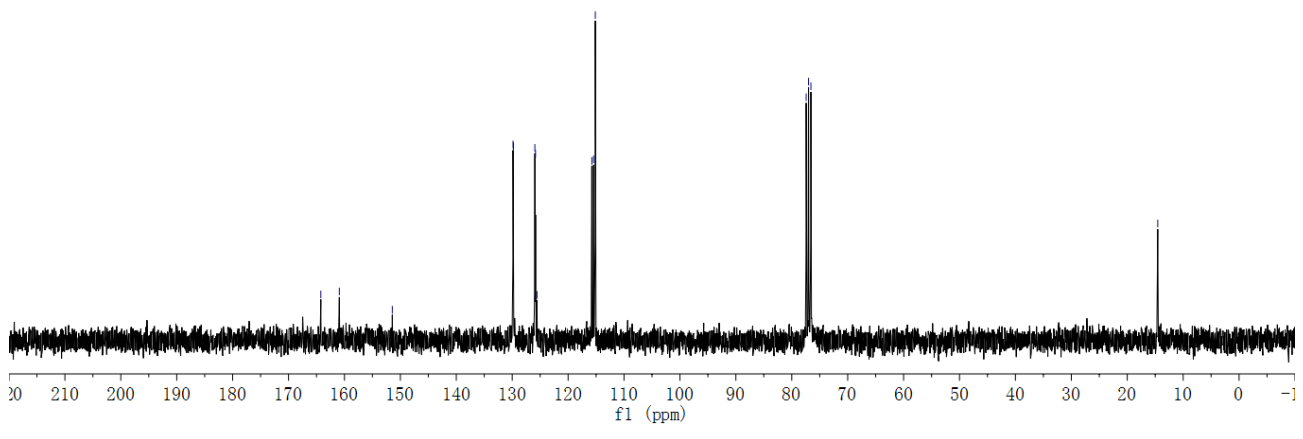

7.8166  
7.5702  
7.5579  
7.4325  
7.4157  
7.2617  
7.1183  
7.1056  
7.1011  
7.0892

-0.0000

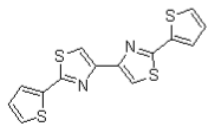

5f

<sup>1</sup>H NMR (300 MHz, CDCl<sub>3</sub>)

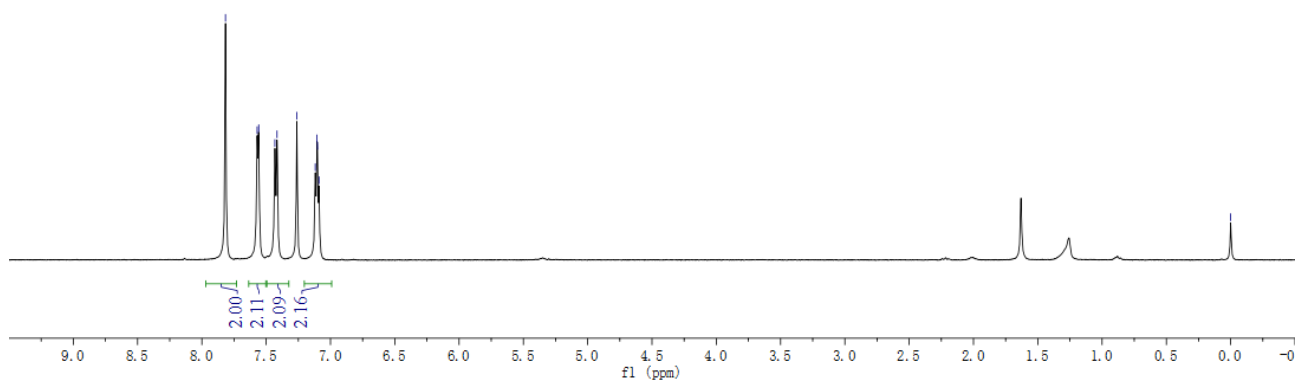

161.87  
150.74  
137.25  
127.87  
127.55  
126.84  
114.90  
77.48  
77.05  
76.63

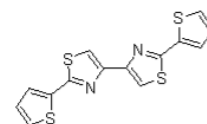

5f

<sup>13</sup>C NMR (75 MHz, CDCl<sub>3</sub>)

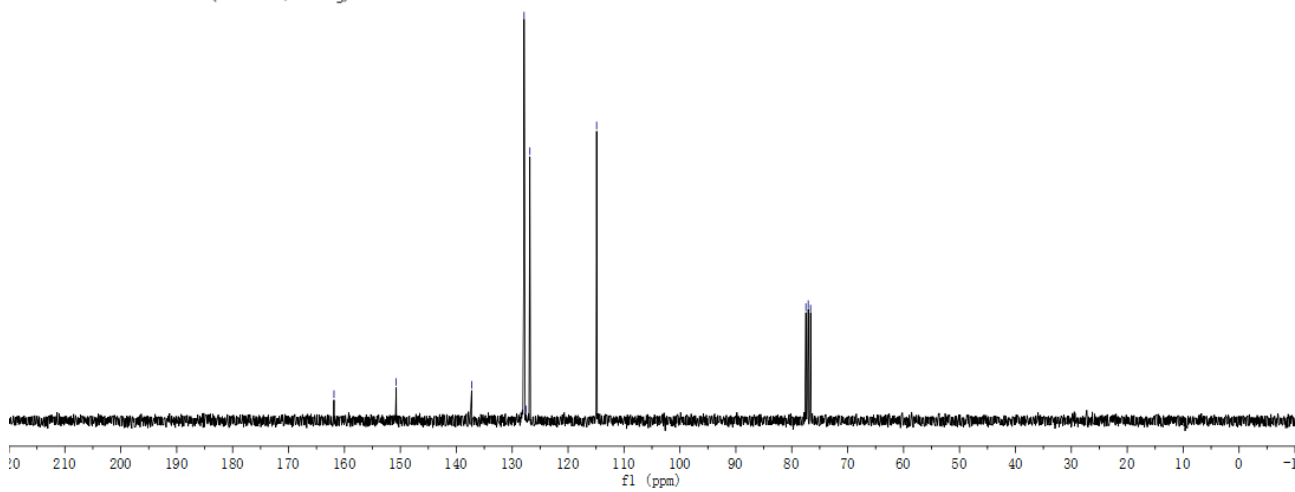

Supplement: c6ob01471b1.pdf [file c6ob01471b1.pdf]
